# Supplementary material for: The number of similar epitopes determines the longevity of immunological memory
Source: Research Square preprint supplement (doi:10.21203/rs.3.rs-3158840/v1), 2023-07-19
Supplement: Supplementary file 1 [file e49c70b6717610cd51f7689d.docx]

**Supplementary Materials**

**Methods**

**Analysis of antibody epitopes**

Human gammaherpesvirus 4 (Epstein Barr virus) strain sLCL-T12.18 (LC573552), human alphaherpesvirus 3 (varicella zoster virus) strain VZVs/Pasadena.USA/48.12/Z[2] (KF811485), variola virus (NC_001611), rubella virus (NC_001545), mumps orthorubulavirus (NC_002200), poliovirus (NC_002058), human papillomavirus type 16 (NC_001526), measles virus (AB016162), hepatitis B virus strain ayw (NC_003977), human immunodeficiency virus isolate 11Gab6352 (JX245015), SARS-CoV-2 isolate Wuhan-Hu-1 (NC_045512) and Influenza A virus A/GuangzhouSB/01/2009 H1N1 segments 1–8 (GQ223441, GQ223442, GQ221693, GQ221694, GQ223444, GQ223445, GQ223446, GQ223447) complete genomes and human papillomavirus type 18 isolate HPJ18-7 *L1* gene (MH057749) were subjected to the analysis of antibody epitopes. The sequence-based antibody epitope score was predicted by using BepiPred-2.0 bioinformatic tool with the default threshold value of 0.50 (http://tools.iedb.org/bcell)31. The epitope candidates less than 7 aa were ruled out.

**Alignment of epitopes with similar sequences and phylogenetic analyses to CD20 proteins**

For each viral proteome, the epitopes with similar sequences were aligned using the software ClustalX2.132. Some of epitope sequences are shorter than 15 aa, and flanking sequences were added such that the sequences were at least 15 aa in length.

Human CD20 (NP_690606), Macaque CD20 (XM_015434168), rabbit CD20 (XM_002709189), mouse CD20 (NP_031667), rat CD20 (XM_032895356), cow CD20 (NP_001071322), dog CD20 (NP_001041493) and *Xenopus* CD20 (XP_002937079) full-length protein sequences were aligned using the software ClustalX2.132. Gaps resulting from the alignment were treated as missing data. *Xenopus* CD20 protein was assigned as an outgroup. The phylogenetic trees were constructed by the software MEGA7.0.14 with Neighbor-Joining (NJ) method and 1,000 bootstrap replications33.

**Generation of rabbit antisera against SARS-CoV-2**

Eight epitopes of the SARS-CoV-2 S protein were synthesized chemically as follows: #AB: YRLFRKSNDPSKPSKRS, epitope #AC: YRLFRKSNTNGTKRFDN, epitope #AD: YRLFRKSNHKNNKSWME, epitope #AE: YRLFRKSNVYAWNRKRI, epitope #AF: YRLFRKSNADYNYKLPD, epitope #AG: YRLFRKSNVEQDKNTQE, epitope #AH: YRLFRKSNVTQRNFYEP and epitope #AI: YRLFRKSNDPLQPELDS. Peptides were coupled to keyhole limpet hemocyanin (KLH)18 with the cross-linking reagent SucciniMidyl 6-[(3-MaleiMido)propionaMido]-hexanoate (SMPH).

Polyclonal antibodies against SARS-CoV-2 S protein were raised in rabbits by the Abmart Company (Shanghai, China) using the above KLH-conjugated peptides as antigens. The immunization was performed under an approved Institutional Animal Care and Use Committee permit. Briefly, rabbits were intradermally injected with 400 µg antigen per injection with complete Freund’s adjuvant. Twenty days later, 400 µg antigen in incomplete Freund’s adjuvant was injected intradermally34. Four immunization groups were set: Group 1: 400 µg epitope #AB, Group 2: 200 µg epitope #AB + 200 µg epitope #AC, Group 3: 100 µg epitope #AB + 100 µg epitope #AC + 100 µg epitope #AD + 100 µg epitope #AE and Group 4: 50 µg epitope #AB + 50 µg epitope #AC + 50 µg epitope #AD + 50 µg epitope #AE + 50 µg epitope #AF + 50 µg epitope #AG + 50 µg epitope #AH + 50 µg epitope #AI. Each group contained three rabbits. The rabbits were terminally bled at 10 days and 1, 2, 3, 4, 5 and 6 months from the second immunization (1–7 months after the initial immunization), and their antisera were collected.

**Enzyme-linked ImmunoSorbent Assay (ELISA)**

To measure the half life of rabbit polyclonal antibody titers against each SARS-CoV-2 antigen, each well of a 96-well polystyrene ELISA plate (Thermo Fisher Scientific, Waltham, MA, USA) was coated with 1 μg of SARS-CoV-2 original strain S protein (Trimer; Antibody-Online, Aachen, Germany; ABIN6952670), SARS-CoV-2 Omicron S protein (B.1.1.529 Trimer; Antibody-Online ABIN7041433), epitope #AB, epitope #AC, epitope #A (YRLFRKSN), epitope #B (DPSKPSKRS) or epitope #C (TNGTKRFDN). After blocking with 1× PBST (phosphate-buffered saline containing 0.05% Tween 20, pH 7.4) plus 3% bovine serum albumin for 1 h at 37 °C, the plate was washed three times with PBST. All antisera were diluted to 1 mg/mL, then further diluted at 1:100 – 1:1000, and then added to each well. The block buffer without antisera was used as the calibrator (negative control). The plates were incubated at 37 °C for 1 h.

After three washes with PBST, horseradish peroxidase (HRP)-conjugated goat anti-rabbit IgG antibody (1:5,000; Thermo Fisher Scientific) was added, and the plates were incubated at 37 °C for 1 h. After washing three times with PBST, 100 μL of 3,3',5,5'-tetramethylbenzidine substrate was added to each well, followed by 100 μL of 2 M H2SO4. The absorbance of each well was measured at 450 nm. The optical density ratios were transformed into final endpoint (dilution) titers35.

**Flow cytometry**

Rabbit whole blood was fixed in 4% formaldehyde (methanol-free) for 10 min at 22°C. Red blood cells were then lyzed by the addition of Triton X-100 (final concentration of 0.1%) for 15 min at 37 °C. For experimentation, cells were treated with 50% methanol for 15 min at 4 °C36. Cells were then incubated with rat anti-human CD20 antibody (Abcam, Boston, MA, USA; ab279300), rat anti-mouse CD20 antibody (Abcam ab171203) or rat IgG2a [RTK2758] (Isotype control; Abcam ab18450) at 0.1 μg for 1 x 106 cells for 30 min at 4 °C. The secondary antibody used was Alexa Fluor® 488 goat anti-rat IgG (H&L) (Abcam ab150157) at 1:2000 dilution for 30 min at 4 °C. Acquisition of >30,000 total events were collected using a 20 mW Argon ion laser (488 nm) and 525/30 bandpass filter of the Accuri C6 Plus Cytometry (Becton Dickinson and Company, Franklin Lakes, NJ, USA).

**Enumeration of antigen-specific memory B cells (MBC)**

The flow cytometry data confirmed the feasibility of human CD20 antibody to separate rabbit MBC. B cells were isolated from total rabbit peripheral BMC through positive selection with human CD20 MicroBeads (Miltenyi Biotec, North Rhine-Westphalia, Germany) according to the manufacturer's protocol using LS columns (Miltenyi Biotec). Purified CD20+ B cells were resuspended in RPMI media20 and cultured in serial 2-fold diluted doses (10 wells per dose), starting with 50,000 to 100,000 purified B cells per well in 96-well flat-bottom plates in a final volume of 200 μl per well. Plates were incubated at 37 °C and 6% CO2 for 6 days20.

Antigen-specific MBC frequencies were calculated by assaying limiting dilution assay (LDA) supernatants with antigen-specific ELISA as previously described37,38. Each well of a 96-well polystyrene ELISA plate was coated with 1 μg of SARS-CoV-2 original strain S protein, SARS-CoV-2 Omicron S protein, epitope #AB, epitope #AC, epitope #A, epitope #B or epitope #C. Plates were blocked at 150 μl/well with PBST plus 3% bovine serum albumin for 1 h at 37 °C. Block buffer was flicked out and plates were washed once with PBST, and tamped dry on paper towels. Supernatants from LDA cultures were then replica-plated onto the ELISA plates, at 15–25 μl/well, and incubated at 37 °C for 1 h. The block buffer without LDA cultures was used as the calibrator (negative control). Plates were then washed three times with PBST and tamped dry on paper towels. Detection antibody (HRP-conjugated goat anti-rabbit IgG antibody) was diluted 1/5000 in block buffer and incubated for 1 h at 37 °C, followed by washing as above. 100 μL of 3,3',5,5'-tetramethylbenzidine substrate was added to each well, followed by 100 μL of 2 M H2SO4. The absorbance of each well was measured at 450 nm. LDA cultures were scored as positive if they demonstrated optical densities 2-fold over the average of the negative control.

**Statistical analysis**

Three independent replicates were set, and average results are presented as mean ± standard deviations (n = 3). Student’s *t* test was used for comparison between different treatments. Statistically significant difference were determined by one way ANOVA (Duncan’s multiple range test; P < 0.05).

Correlations between peripheral antigen-specific memory B-cell numbers and antibody titers from 4 to 7 months after the initial immunization were calculated. The F-test was performed to analyze all the correlations and determine whether the data pairs fit the linear regression model. The correlation coefficient (R) and the P-value were obtained by using SPSS v19.0.

**Supplementary References**

31. Jespersen, M. C., Peters, B., Nielsen, M. & Marcatili, P. BepiPred-2.0: improving sequence-based B-cell epitope prediction using conformational epitopes. *Nucleic Acids Res.* **45**, W24–W29 (2017).

32. Larkin, M. A. et al. Clustal W and Clustal X version 2.0. Bioinformatics **23**, 2947–2948 (2007).

33. Kumar, S., Stecher, G. & Tamura, K. MEGA7: Molecular Evolutionary Genetics Analysis version 7.0 for bigger datasets. *Mol. Biol. Evol.* **33**, 1870–1874 (2016).

34. Johnston, B. A., Eisen, H. & Fry, D. An evaluation of several adjuvant emulsion regimens for the production of polyclonal antisera in rabbits. *Lab. Anim. Sci.* **41**, 15–21 (1991).

35. Yang, X., Fox, A. & Powell, R. L. R. Qualitative immunoassay for the detection of anti-SARS-COV-2 spike antibody in human milk samples. *STAR Protoc.* **3**, 101203 (2022).

36. Chow, S. et al. Whole blood fixation and permeabilization protocol with red blood cell lysis for flow cytometry of intracellular phosphorylated epitopes in leukocyte subpopulations. *Cytometry A* **67**, 4–17 (2005).

37. Slifka, M. K. & Ahmed, R. Limiting dilution analysis of virus specific memory B cells by an ELISPOT assay. *J. Immunol. Methods* **199**, 37–46 (1996).

38. Hammarlund, E. et al. Duration of antiviral immunity after smallpox vaccination. *Nat. Med.* **9**, 1131–1137 (2003).


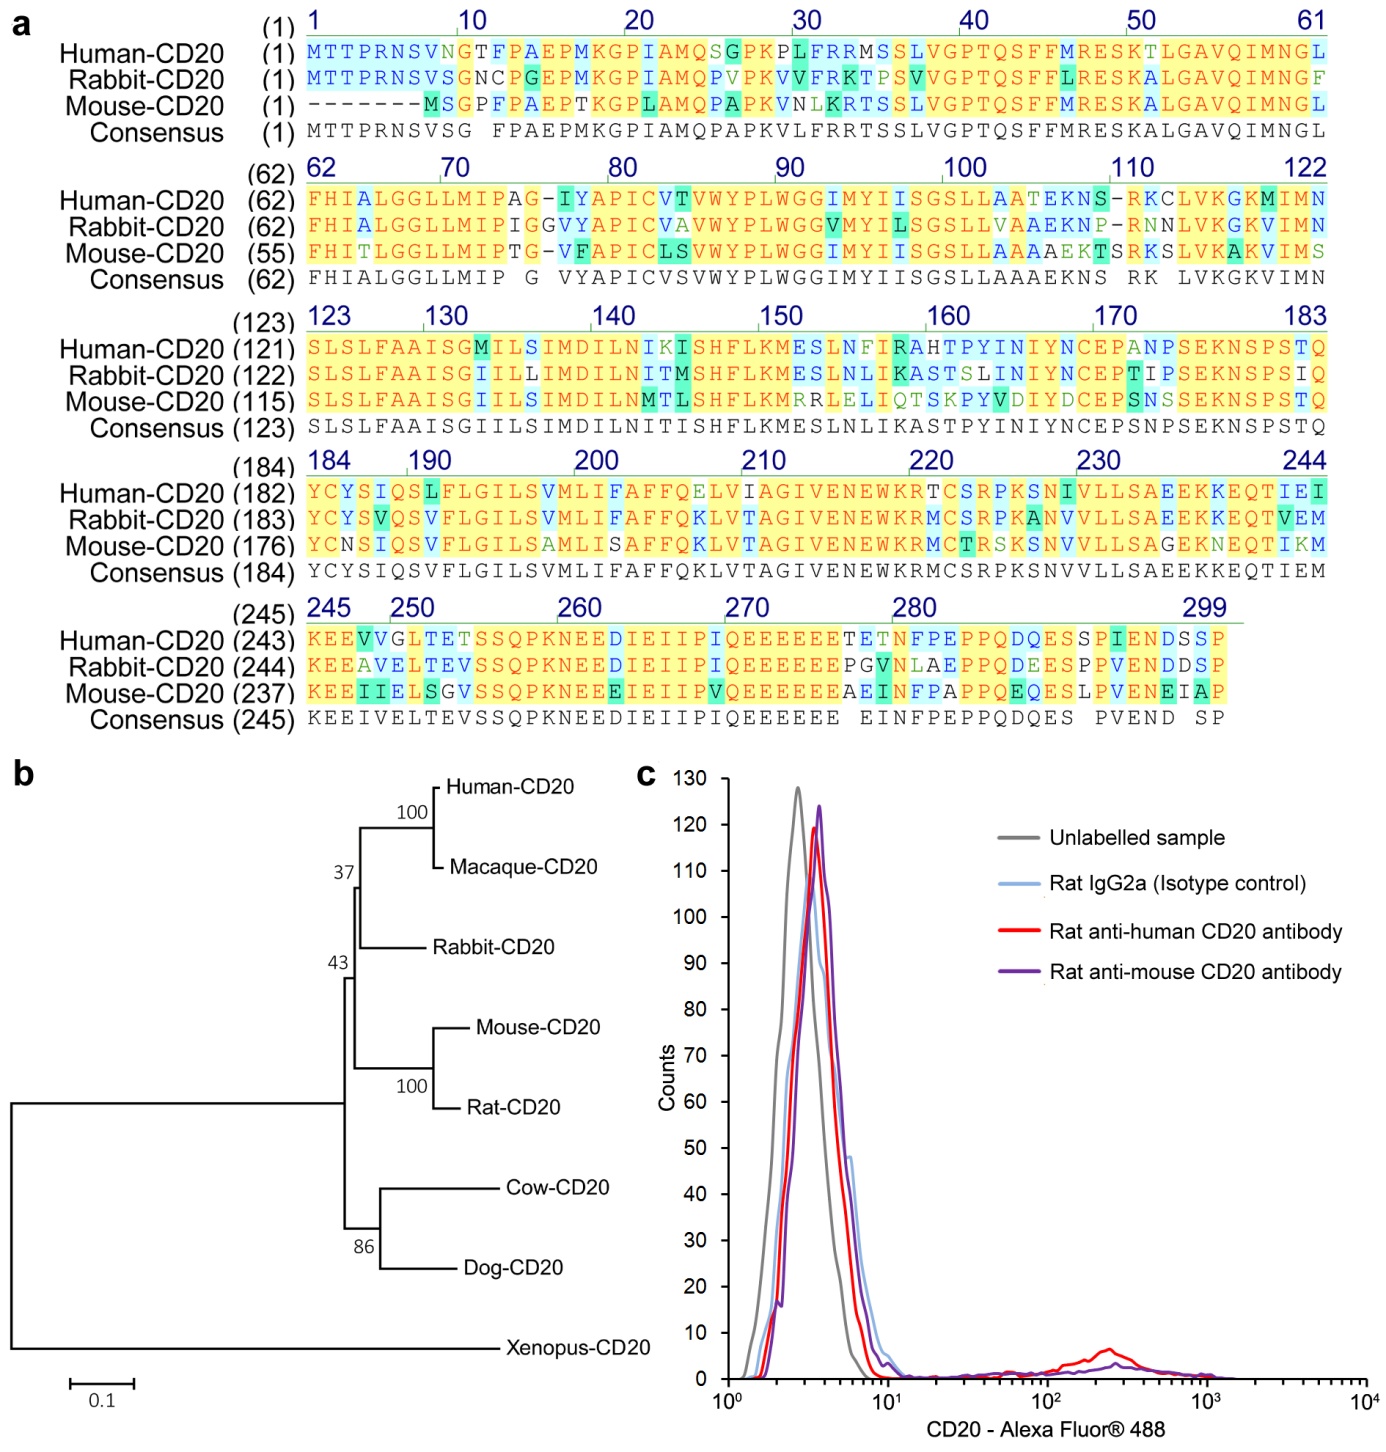


**Extended Data Fig. 1 |** **Anti-human CD20 antibody can also recognize the rabbit CD20 homolog.** (**a**) Alignment of human CD20, rabbit CD20 and mouse CD20 proteins. (**b**) Phylogenetic tree of vertebrate CD20 proteins. The phylogenetic trees were constructed by the software MEGA7.0.14 with Neighbor-Joining (NJ) method and 1,000 bootstrap replications. Numbers at various nodes indicate bootstrap support values. Bar represents 0.10 genetic distance. (**c**) Flow cytometry of rabbit peripheral blood lymphocytes. Rabbit whole blood was fixed in 4% formaldehyde for 10 min at 22 °C. Red blood cells were then lyzed by the addition of Triton X-100 for 15 min at 37 °C. Cells were then incubated with rat anti-human CD20 antibody (red line), rat anti-mouse CD20 antibody (purple line) or rat IgG2a (Isotype control; celeste line) at 0.1 μg for 1 x 106 cells for 30 min at 4 °C. The secondary antibody used was Alexa Fluor® 488 goat anti-rat IgG at 1/2000 dilution for 30 min at 4 °C. Unlabelled sample (grey line) was also used as a control. Acquisition of >30,000 total events were collected.

**Extended Data Table 1 | Epitopes of human gammaherpesvirus 4 (Epstein-Barr virus).**

| **Protein** | **Start** | **End** | **Epitope** | **Length** |
| --- | --- | --- | --- | --- |
| LMP-2A | 6 | 83 | MVPMGAGPPSPGGDPDGDDGGNNSQYPSASGSSGNTPTPPNDEERESNEEPPPPYEDLDWGNGDRHSDYQPLGNQDPS | 78 |
| 89 | 121 | NQDPSLYLGLQHDGNDGLPPPPYSPRDDSSQHIYEEAGRGSMN | 33 |
| 172 | 180 | AAAQRKLLT | 9 |
| 378 | 388 | TNFKSLSSTEF | 11 |
| 486 | 494 | EERPPTPYR | 9 |
| LMP-2B | 52 | 61 | SAAAQRKLLT | 10 |
| 80 | 87 | RIEDPPFN | 8 |
| 257 | 270 | LQTNFKSLSSTEFI | 14 |
| 294 | 300 | WGSGNRT | 7 |
| 367 | 375 | EERPPTPYR | 9 |
| BNRF1 | 4 | 15 | RGRETQMPVARY | 12 |
| 30 | 50 | EANIQEQRLYELLSDPRSALG | 21 |
| 69 | 82 | TNNDPRPQRQERAR | 14 |
| 94 | 110 | GEQGEHLGTESALEASG | 17 |
| 120 | 128 | DWMARPSTW | 9 |
| 159 | 166 | RSRPSFRQ | 8 |
| 175 | 215 | LFDNALRKYDSGQVAAGFQRALLVAGPETADTRPDLRKLNE | 41 |
| 217 | 228 | VFGGRAAGGRQL | 12 |
| 247 | 269 | VLQPTETLDTWKVLSRDTRTAHS | 23 |
| 283 | 290 | ANCPQLFM | 8 |
| 316 | 332 | TGPGADARAAARRQQAF | 17 |
| 358 | 364 | ATLKGGE | 7 |
| 382 | 389 | ALDTVRYD | 8 |
| 412 | 434 | PYAESSWAQAAVQTALELFSALY | 23 |
| 473 | 493 | DDVKDGLGEMGPARATGPGMQ | 21 |
| 514 | 523 | QRGEKINGRT | 10 |
| 556 | 609 | DLASPVSTAEMMDDFSPFFTVEFPPIQEEGASSPVPLDVDESMDISPSYELPWL | 54 |
| 648 | 654 | VGPLDLP | 7 |
| 664 | 699 | SQVWTRPGGAPPLPYRTWDRMTEKLLVSAKPGGENV | 36 |
| 788 | 796 | CPETGSSAS | 9 |
| 812 | 823 | SGPLITPVLQKT | 12 |
| 848 | 861 | SDVATTPRAPEALS | 14 |
| 992 | 1035 | YECLRPDRINRSMHVSDYGYNEALAVSPLTGKNLSPRRLVTEPD | 44 |
| 1073 | 1079 | VRDNTFL | 7 |
| 1146 | 1165 | GSTDNPPAPGVEVNVQRSPL | 20 |
| 1237 | 1253 | GTDAWRFAMNYPRNPTE | 17 |
| 1283 | 1294 | WEHIPPAFGHPT | 12 |
| BCRF1 | 22 | 32 | GGTDQCDNFPQ | 11 |
| 48 | 55 | FQTKDEVD | 8 |
| 85 | 103 | EEVMPQAENQDPEAKDHVN | 19 |
| 121 | 129 | RFLPCENKS | 9 |
| 136 | 149 | KNAFNKLQEKGIYK | 14 |
| EBNA-LP | 4 | 432 | RSEVPGPARPGPPGIGPEGPLGQLLRRHRSPSPTRGGQEPRRVRRRVLVQQEEEVVSGSPSGPRGDRSEVPGPARPGPPGIGPEGPLGQLLRRHRSPSPTRGGQEPRRVRRRVLVQQEEEVVSGSPSGPRGDRSEVPGPARPGPPGIGPEGPLGQLLRRHRSPSPTRGGQEPRRVRRRVLVQQEEEVVSGSPSGPRGDRSEVPGPARPGPPGIGPEGPLGQLLRRHRSPSPTRGGQEPRRVRRRVLVQQEEEVVSGSPSGPRGDRSEVPGPARPGPPGIGPEGPLGQLLRRHRSPSPTRGGQEPRRVRRRVLVQQEEEVVSGSPSGPRGDRSEVPGPARPGPPGIGPEGPLGQLLRRHRSPSPTRGGQEPRRVRRRVLVQQEEEVVSGSPSGPLRPRPQPPAQSLREWLLRISERFDPHPVATRRQSVY | 429 |
| EBNA-2 | 7 | 451 | ALHGGQSYNLIVDTDMSGNPSLSVIPTNPYQEQLSNNPLIQLQIVVGENTGAPAPPQPPPPPPPPPPPERRDAWTQEPLPLDMNPLGSDASQGPLASSIRMLCMAQYLLRNARGQQGLLRPLGPQTRSQVTLERQPVHNPRQEAPIILLQSPAPPRFTPVPMVALGHTLQPTPPPRPTLPQPRIPLIIPPRHTNQPATTPPTAPQRLTLGHQLSLPPHPPPHQSTPHCSSDSTGLPPPPTSYSIPSMTLSPEPLPPPAAPAHPLPGVIYDQQALPPTPGPPWWPPVRDPTPTTQTPPTNTKQGPDQGQGRGRWRGRGRSKGRGRMHKLPEPRRPGPDTSSPSMPQLSPVVSLHQGQGPENSPTPGPSTAGPVCRVTPSATPDISPIHEPESSDSEEPPFLFPSDWYPPTLEPAELDESWEGIFETTESHSSDEENVGGPSKRPRT | 445 |
| BHLF1 | 4 | 563 | PRMSSRTRQAGHALGEGTGWEQGGGVPGPQPPAGNPGVPGQQSKRTTPIRTLPADAATPRGAPEPGKPGTPWGRDRRGWGPGDHAPTLHSRCSGAPGTPAAPGPGGGAAVPSGATPHPERGSGPADPPAAARLPPERQEPRLPQDLAAAQRCPAGPPPTRSGAAAQRTHRRPPGCPRSARNPGCPWTWRRRSGAQRGHPPPGAGQRPSGPTGGRPAAPGAPGTPAAPGPGGGAAVPSGATPHPERGSGPADPPAAARLPPERQEPRLPQDLAAAQRCPAGPPPTRSGAAAQRTHRRPPGCPRSARNPGCPRTWRRRSGAQRGHPPPGAGQRPSGPTGGRPAAPGAPGTPAAPGPGGGAAVPSGATPHPERGSGPADPPAAARLPPERQEPRLPQDLAAAQRCPAGPPPTRSGAAAQRTHRRPPGCPRSARNPGCPRTWRRRSGAQRGHPPPGAGQRPSGPTGGRPAAPGAPGTPAAPGPGGGAAVPSGATPHPERGSGPADPPAAARLPPERQEPRLPLDLAAAQRCPAGPPPTRSGAAAQRTHRRPPGCPRSARNPGCP | 560 |
| BHRF1 | 17 | 43 | SRVHGNGALHPVLELAARETPPRLSPE | 27 |
| 62 | 81 | SETFTETWNRFITHTENLDL | 20 |
| 135 | 163 | EASEGLDGWIHQQGGWSTLIENNIPGSRR | 29 |
| BFLF2 | 6 | 86 | PEAVNARQQRPADPALRRLMHPHHRNYTASKASAHSVKSVSRCGKSRSELGRMERVGSVARSICSRHTRHGVDRSHFSLRD | 81 |
| 92 | 110 | SANFELGKDFLREMNTPIH | 19 |
| 135 | 143 | FGHSLTLGS | 9 |
| 147 | 160 | ICINRSQVHVPQEF | 14 |
| 274 | 288 | RDTVYEKAVNVDEDA | 15 |
| 295 | 301 | DLECGDE | 7 |
| BFLF1 | 5 | 58 | VTSANEPNPLTGKRLSSCPLTRSGVTEVAQTAGRTPKMEEFVPWTVDNLKSQFE | 54 |
| 70 | 94 | PANAEEGIAYPPLVHTYESLSPAST | 25 |
| 151 | 162 | PMAGGLDSLFMP | 12 |
| 181 | 192 | LPVSSSDMIRNA | 12 |
| 208 | 255 | GQSPANFCFKSMWPRTTPTFLTLPGPRTCKDSQDVPGDVGRGQYTALC | 48 |
| 257 | 284 | HLPTRNRVQHPFLRAEKGGLSPEITTKA | 28 |
| 297 | 335 | TDLLGGPGHHAIGLNAEYSGDELAELALAITRPEAGDHS | 39 |
| 346 | 352 | GLRHKNA | 7 |
| 402 | 409 | NTLLDVPC | 8 |
| 448 | 455 | GQIYPPSF | 8 |
| BFRF1A | 5 | 46 | GGKVRSSGFLIPGSAPVSGTPPQGQGGLASSRVYEDSGGSLL | 42 |
| 83 | 92 | ENSGQGLGGV | 10 |
| 116 | 132 | STLDLVNHGEPGREAPR | 17 |
| BFRF1 | 23 | 43 | SGSLEVERCSGAHVFSRGSSQ | 21 |
| 98 | 118 | PSGLRSGQSGPCLGLSTDVDL | 21 |
| 172 | 179 | ANAQKASR | 8 |
| 189 | 301 | QQLSRSGQVEDTGARVTGGGGPRPSVTHSGCLGDSHVRGRGGWDLDNFSEAETEDEASYAPWRDKDSWSESEAAPWKKELVRHPIRRHRTRETRRMRGSHSRVEHVPPETRET | 113 |
| BFRF2 | 9 | 28 | TLSGTGAGGHGRGPAPDVSE | 20 |
| 34 | 40 | PALGERE | 7 |
| 67 | 123 | RPPASEAAVASTPGSLFRSHSSAYWLSEVERPGGLVRWARSQTSPSSLTLAPHLGPS | 57 |
| 173 | 182 | FCENTRAVAR | 10 |
| 198 | 212 | RSSYDPPLLRQNSRP | 15 |
| 220 | 268 | KNYVPGLDSQSCVTVPSFSRWAQSHASELDPREIRDRVTPATAPSFVAD | 49 |
| 314 | 336 | AVSEGGRKTGGGVGEELVGAGGP | 23 |
| 373 | 381 | ASRPVSGPD | 9 |
| 397 | 412 | NFGKQTGVGGRLNSFR | 16 |
| 452 | 462 | AEPPSARSGWQ | 11 |
| 527 | 544 | CQQRQAPEDARDEPHLFS | 18 |
| 548 | 557 | EVELPPGERC | 10 |
| 563 | 588 | YQTRYGTPAAQAHPPGEAGGGFSRQS | 26 |
| BFRF3 | 5 | 43 | LPKPTLQGRLEADFPDSPLLPKFQELNQNNLPNDVFREA | 39 |
| 60 | 173 | YVQRTFGVPRRQRAIDKRQRASVAGAGAHAHLGGSSATPVQQAQAAASAGTGALASSAPSTAVAQSATPSVSSSISSLRAATSGATAAASAAAAVDTGSGGGGQPQDTAPRGAR | 114 |
| BPLF1 | 25 | 36 | DVNAPGGGSGGS | 12 |
| 78 | 90 | PLTSRPELDEVLD | 13 |
| 196 | 208 | CQKDAAPGTPAHV | 13 |
| 260 | 268 | EANGSGFDL | 9 |
| 273 | 293 | LVSSDGEAAGTPGADSSPPVM | 21 |
| 310 | 381 | SRSFTSDSFPAARYSPAKTNSPPSSPASAAPASAAPASAAPASAAPASAAPASAAPASAAPASAAPASSPPL | 72 |
| 387 | 499 | GLGHTPGVPAPSTPPRASGGAAPQTPKRKKGLGKDSPHKKPTSGRRLPLSSTTDTEDDQLPRTHVPPHRPPSAARLPPPVIPIPHQSPPASPTPHPAPVSTIAPSVTPSPRLP | 113 |
| 505 | 637 | PLPQAAPSNPKIPLTTPSPSPTAAAAPTTTTLSPPPTQQQPPQSAAPAPSPLLPQQQPPPSAARAPSPLPPQQQPLPSATPAPPPAQQLPPSATTLEPEKNHPPAADRAGTEISPSPPFGQQPSFGEDASGGA | 133 |
| 653 | 676 | MSDSEEAESDLASDIPTTEDEDMF | 24 |
| 685 | 705 | LESGSSAPTSPITLDTARSQY | 21 |
| 710 | 717 | FDIETPEM | 8 |
| 739 | 753 | IVYDPASNREVPEAD | 15 |
| 820 | 827 | ENKGRAGE | 8 |
| 863 | 873 | QLAESDDGKFD | 11 |
| 886 | 910 | SGGDQEGGEGGGEPEDNSIYRGPHV | 25 |
| 933 | 945 | TAVARQQAGVDEE | 13 |
| 958 | 968 | YGAPPAASVPP | 11 |
| 1063 | 1102 | GIPWPLERVEEDDPSIAPLPEFETVAKKQKELETTRENEK | 40 |
| 1120 | 1152 | VASAPGAPISPASPSATPANHDNPEATPPLADT | 33 |
| 1170 | 1177 | IVGAAKNP | 8 |
| 1228 | 1236 | VLDPEVQDG | 9 |
| 1297 | 1305 | TVTGQAPED | 9 |
| 1338 | 1347 | KNNNNDQLRQ | 10 |
| 1358 | 1367 | EGFKPATEEQ | 10 |
| 1373 | 1382 | DTAPNKELKR | 10 |
| 1394 | 1420 | TGRKEKEKLREQEDKERRERRAREANE | 27 |
| 1430 | 1443 | GARPEPAPTSPDDW | 14 |
| 1452 | 1461 | PDNTDSAAAA | 10 |
| 1501 | 1522 | DGGAAERMEAAEPGWFTEIETG | 22 |
| 1529 | 1550 | AWPATPAATAKEGGGGRGAEEA | 22 |
| 1573 | 1583 | QALQSPDMKSA | 11 |
| 1588 | 1598 | DLEAPYAEYER | 11 |
| 1624 | 1656 | RTLPEATNDPGQANLPPPPTIPQATAPPRLASD | 33 |
| 1733 | 1743 | RSRDEAPDDEL | 11 |
| 1747 | 1758 | LPSPPKAPVQAP | 12 |
| 1766 | 1776 | AAAGNGSWPYR | 11 |
| 1832 | 1839 | MAQNSMDG | 8 |
| 1852 | 1863 | PKRVAGGKETFA | 12 |
| 1878 | 1887 | EAQEESQLQG | 10 |
| 1896 | 1903 | ARGHTDPR | 8 |
| 1970 | 1983 | SAPPTGWGNGAPTR | 14 |
| 2005 | 2024 | ESPCDPLNPAYVSADTQEPL | 20 |
| 2047 | 2069 | AFSLTPAGRPQAIGPPQDDQERR | 23 |
| 2083 | 2100 | AAAADSYWDTWPDVESNA | 18 |
| 2138 | 2149 | RNHPPYPAPATD | 12 |
| 2213 | 2235 | SPASGRGGMPSTTRGSDDGEDAR | 23 |
| 2309 | 2315 | PLEGPVA | 7 |
| 2328 | 2353 | YTRGEELPRAEGLEVPRETPSSYGTV | 26 |
| 2365 | 2379 | GTPITGPKRGSGDTI | 15 |
| 2447 | 2455 | DGYSESFEP | 9 |
| 2475 | 2486 | RAAKPKEARPPT | 12 |
| 2517 | 2528 | AGASRWPTDVLN | 12 |
| 2531 | 2552 | FYEHEDPPLPVGYQLPPNPRNV | 22 |
| 2570 | 2619 | GDGFQSADNTPASSDRLQQLGGGETDQGEKGSTTAESEASGPPSPQSPLL | 50 |
| 2622 | 2647 | VAPGRPRDWLSPTSSPRDVTVTPGLA | 26 |
| 2663 | 2687 | FGAETRASESPDRSPGRSPRPWPKD | 25 |
| 2689 | 2706 | LELLPQPAPQQPPSKPIV | 18 |
| 2710 | 2725 | SPHSTPSTASGSQKKH | 16 |
| 2732 | 2763 | LVPSQKPSYSPSAPYKPGQSTGGIAPTPSAAS | 32 |
| 2769 | 2786 | LQPQDTQASSQDPPYGHS | 18 |
| 2790 | 2812 | REKKQQGGREEAAEIRPSATRLP | 23 |
| 2816 | 2932 | GLRPRAPVVAAGAAASATPAFDPGEAPSGLPIPQAPALGSGLAAPAHTPVGALAPSPQKTQAQRPQDAAALPTPTIKAVGARPVPKATGALAAGARPRGQPTAAPPSAASPPRVSLP | 117 |
| 2934 | 2960 | RSRQQQSPAIPLPPMHSGSEPGARPEV | 27 |
| 2966 | 3011 | RHAGPQTYTVQKEAPPSAASQLPKMPKCKDSMYYPPSGSARYPAPF | 46 |
| 3019 | 3030 | SVASPAPSSDQT | 12 |
| 3055 | 3081 | TGGSTSGDLVVPSGSPSSLSTAAPEQD | 27 |
| BOLF1 | 5 | 27 | MESDSSGGSGGADAQPPLAEVDG | 23 |
| 38 | 44 | LSGDDPA | 7 |
| 55 | 64 | LGIFGLGDLA | 10 |
| 102 | 111 | FSRRSFGLGH | 10 |
| 121 | 139 | SSLPPTTASPATDDPLDGS | 19 |
| 157 | 170 | EEGSGEVLAVSGPT | 14 |
| 189 | 205 | DAFPREGLSFYAFNAAK | 17 |
| 221 | 235 | RYPWAAAGQGQPTAA | 15 |
| 246 | 263 | EHSGGGAGGGEGEESGGG | 18 |
| 296 | 305 | ASGGQTPPVA | 10 |
| 369 | 381 | AAGSRASFSPAAI | 13 |
| 409 | 420 | PRVSRSRWRWLE | 12 |
| 463 | 497 | EAVDRRARRTSGPSTPAAAPAATAVGVGAAADPWD | 35 |
| 538 | 574 | WQAPAPAPALPCKPPLLPGEQGRRQWTAAVAAAPRTD | 37 |
| 580 | 580 | R | 1 |
| 582 | 597 | LRAGQTARADPAYVHS | 16 |
| 640 | 646 | LALPSPE | 7 |
| 667 | 715 | GAPPMPGESPQAVGLRPLNLEGEGKAGDAGAEGAEDEEGGGPWGLSSHD | 49 |
| 739 | 747 | ERAAEAPPL | 9 |
| 818 | 841 | EEEEEAVVAVKEKSVSSSPRHYST | 24 |
| 893 | 908 | PLWAHTSEPLRPDLEE | 16 |
| 941 | 952 | ARLFQPPAIDAE | 12 |
| 956 | 989 | AIVRRDARPPPVFTPAPRRLPQGGADTPPPLSMD | 34 |
| 1007 | 1029 | DHHPAAPETTPIKTYTPAMDLNP | 23 |
| 1032 | 1039 | ITVTPRSP | 8 |
| 1051 | 1079 | VQTHHLVPALTDDSPSPVGQTPPPFRILP | 29 |
| 1091 | 1110 | GRNASKRRASRDLSPPPHGR | 20 |
| 1115 | 1209 | LDSSPFSFSSSDFSDQDEGEGGEADLRGVPGGGGEGAYEEDRERPSDIDTAARAQKVETSCPRRRSPRTTPSPSRRASGGGGPDRGEAEAHTYPP | 95 |
| 1218 | 1237 | SRVRPRTRRGATRRPPRPTA | 20 |
| BORF1 | 5 | 37 | GSVDRRRLQRRIAGLLPPPARRLNISRGSEFTR | 33 |
| 44 | 87 | EEHAQASSLSAAAVWRAGLLAPGEVAVAGGGSGGGSFSWSGWRP | 44 |
| 136 | 150 | NHGRGVAARVEAGGG | 15 |
| 176 | 184 | VADRRFHNF | 9 |
| 211 | 218 | VVSKAIPR | 8 |
| 236 | 258 | WLSGGAGGGGGGCFVGGLGLQPC | 23 |
| 329 | 335 | ATDGWRR | 7 |
| 353 | 360 | FYSNVSDW | 8 |
| BORF2 | 43 | 65 | ESVTHTVAEYLEVFSDKFYDEEF | 23 |
| 85 | 92 | AYERIVSS | 8 |
| 106 | 114 | YVGRSGKQE | 9 |
| 135 | 153 | AGLRAALQRARPEIESDME | 19 |
| 194 | 202 | LSSEWDVTQ | 9 |
| 224 | 230 | GAGQDGK | 7 |
| 275 | 281 | LPENHER | 7 |
| 314 | 332 | DAGDLERLYGEEFEREYYR | 19 |
| 373 | 381 | HFWRDLQGE | 9 |
| 417 | 457 | APLAVRAQRADTQGDELLLALPRLSVTLPGEGAVGDGFSLA | 41 |
| 477 | 487 | GSPTYDSRDMA | 11 |
| 505 | 512 | WQYTDPPS | 8 |
| 539 | 578 | RKIFPGFKQSKYAGGWFHWHDWAGTDLSIPREIWSRLSER | 40 |
| 619 | 631 | VTNKEEALRPNRS | 13 |
| 638 | 660 | LDDREALNLVGGRVSCLPEALRQ | 23 |
| 729 | 822 | IEKAADLGVMECKASAALSVPREEQNERSPAEQMPPRPMEPAQVAGPVDIMSKGPGEGPGGWCVPGGLEVCYKYRQLFSEDDLLETDGFTERAC | 94 |
| BaRF1 | 21 | 30 | HRNRWFAAHI | 10 |
| 32 | 45 | LTKDCGCLKLLNER | 14 |
| 106 | 114 | FDGDRAAMN | 9 |
| 233 | 243 | GEGVTLVDVRA | 11 |
| 260 | 268 | GQAPLYGTP | 9 |
| 277 | 299 | YMTSIKQTNFFEQESSDYTMLVV | 23 |
| BMRF1 | 38 | 44 | LSVNYGG | 7 |
| 67 | 81 | AVAEWQNHQSPEEAP | 15 |
| 114 | 122 | YKRPQGGSR | 9 |
| 134 | 140 | DKVSKSH | 7 |
| 145 | 158 | LMPYMPPASDRLRN | 14 |
| 208 | 231 | TLDYKPLSVGPYEAFTGPVAKAQD | 24 |
| 298 | 401 | ASEEAAASTASEPEDKSPRVQPLGTGLQQRPRHTVSPSPSPPPPPRTPTWESPARPETPSPAIPSHSSNTALERPLAVQLARKRTSSEARQKQKHPKKVKQAFN | 104 |
| BMRF2 | 38 | 45 | EIFSPWQT | 8 |
| 181 | 190 | RNQIYTSGLE | 10 |
| 289 | 295 | HETLGPL | 7 |
| 324 | 330 | KKFVNGP | 7 |
| BSLF2 / BMLF1 | 6 | 274 | RLSRTSSISSNEDPAESHILELEAVSDTNTDCDMDPMDGSEEHSTDGEISSSEEEDEDPTPAHAIPAQPSSVVITPTSASFVIPRKKWDLQDKTVTLHRSPLCRDEDEKEETGNSSYTRGHKRRRGEVHGCTDESYGKRRHLPPGARAPRAPRAPRVPRAPRSPRAPRSNRATRGPRSESRGAGRSTRKQARQERSQRPLPNKPWFDMSLVKPVSKITFVTLPSPLASLTLEPIQDPFLQSMLAVAAHPEIGAWQKVQPRHELRRSYKT | 269 |
| 322 | 329 | GDLPLAPA | 8 |
| 411 | 421 | NCRRRHDEVEF | 11 |
| BSLF1 | 44 | 51 | PLHHVAGS | 8 |
| 87 | 97 | LRGLTPLTADR | 11 |
| 119 | 129 | TLSAKKQPQGD | 11 |
| 194 | 202 | LFTSESGQS | 9 |
| 251 | 259 | DAYRGRLPL | 9 |
| 280 | 302 | TFKRYSQLTSVGEIGCLPSGGVV | 23 |
| 314 | 326 | HMRTYFTRETYLA | 13 |
| 330 | 352 | RVQQLKIRMEPPAPYTWDPDPDD | 23 |
| 374 | 385 | RWHADEGPTYPP | 12 |
| 398 | 419 | TCRGQWNPKEQFLPPTVLRRVQ | 22 |
| 447 | 459 | AEVVSTPTNCRLP | 13 |
| 469 | 486 | YTPVYYSQNSLSEQLFVS | 18 |
| 509 | 516 | KGPPWSLE | 8 |
| 553 | 566 | PPADPDNMEDVLPF | 14 |
| 611 | 622 | RRMRHKIKEIGA | 12 |
| 664 | 671 | EDKHSYVK | 8 |
| 673 | 679 | ALNIQNL | 7 |
| 681 | 690 | HHSLHVGWPA | 10 |
| 701 | 720 | DGRDYLIQRTRETLPPTVEN | 20 |
| 726 | 732 | EGHLGLD | 7 |
| 788 | 796 | RHTHRASSK | 9 |
| 842 | 870 | IINRAEASQDSTTSQLARRRDRQDGSFSE | 29 |
| BSRF1 | 17 | 50 | GRPRNRYSQLPEEPETFECPDRWRAEIDLGLPPG | 34 |
| 57 | 64 | LRNEQTMG | 8 |
| 83 | 93 | LKRFDAVRVPE | 11 |
| 137 | 144 | DKQAGDSL | 8 |
| 158 | 166 | MDETGAWAQ | 9 |
| 170 | 214 | AVVSSVTAPSASAPFINSAFEPEVPTPVLAPPPVVRQPEHSGPTE | 45 |
| BLLF3 | 9 | 23 | YAFQNDKLLLQQASV | 15 |
| 114 | 131 | PQMEEDKGPINHPQYPGD | 18 |
| 220 | 244 | HHLTSFYSPHSDAGVLGPRSLFRWA | 25 |
| 252 | 275 | PGLAMGDSGLSEALEGRQGRGFGS | 24 |
| BLRF1 | 31 | 64 | GASSPTNAAAASLTEAQDQFYSYTCNADTFSPSL | 34 |
| BLRF2 | 4 | 20 | PRKVRLPSVKAVDMSME | 17 |
| 37 | 68 | KQQVLRGGACASSTSVPSAPVPPPEPLTARQR | 32 |
| 93 | 106 | KSVDGVTTRNEMEN | 14 |
| 120 | 158 | LGAKGQPSPGEGTRPRESNDPNATRRARSRSRGREAKKV | 39 |
| BLLF1 | 73 | 88 | KAVYQPRGAFGGSENA | 16 |
| 116 | 124 | TAGEEQQVS | 9 |
| 188 | 197 | PTSAQDSNFS | 10 |
| 217 | 225 | EISQVLPGD | 9 |
| 235 | 260 | YESHVPSGGILTSTSPVATPIPGTGY | 26 |
| 287 | 298 | GNGPKASGGDYC | 12 |
| 308 | 332 | EIPASQDMPTNTTDITYVGDNATYS | 25 |
| 335 | 347 | MVTSEDANSPNVT | 13 |
| 354 | 361 | WPNNTETD | 8 |
| 369 | 379 | TSGTPSGCENI | 11 |
| 409 | 415 | ATNATTT | 7 |
| 423 | 646 | KAPESTTTSPTLNTTGFAAPNTTTGLPSSTHVPTNLTAPASTGPTVSTADVTSPTPAGTTSGASPVTPSPSPRDNGTESKAPDMTSPTSAVTTPTPNATSPTPAVTTPTPNATSPTLGKTSPTSAVTTPTPNATSPTPAVTTPTPNATIPTLGKTSPTSAVTTPTPNATSPTVGETSPQANTTNHTLGGTSSTPVVTSPPKNATSAVTTGQHNITSSSTSSMSL | 224 |
| 649 | 665 | SSISETLSPSTSDNSTS | 17 |
| 673 | 808 | AHPTGGENITQVTPASTSTHHVSTSSPAPRPGTTSQASGPGNSSTSTKPGEVNVTKGTPPKNATSPQAPSGQKTAVPTVTSTGGKANSTTGGKHTTGHGARTSTEPTTDYGGDSTTPRTRYNATTYLPPSTSSKLR | 136 |
| 811 | 835 | WTFTSPPVTTAQATVPVPPTSQPRF | 25 |
| BLLF2 | 5 | 105 | VRQRPAQAPPAKRQALETVPHPQNRGRLMSPKARPPKMQRRPRPPVAKRRRFPRSPQQVERPILPPVESTPQDMEPGQVQSPPQITAVIQLRQERDTMRPP | 101 |
| 123 | 145 | AHRLPQPKPPCLSRQRPSPDSQT | 23 |
| EBNA-3A | 1 | 33 | MDKDRPGLPAPDDNIEEVPSTSGVQERASEGDW | 33 |
| 42 | 89 | DSSSEEEAEDAHLEPSQRGKKRKRVDDDAGGSAPAQHVPPPQLDHPGR | 48 |
| 111 | 119 | ATVHPDTRA | 9 |
| 147 | 157 | DRRRNPASRRS | 11 |
| 215 | 227 | GTFRPPRCSPGDR | 13 |
| 239 | 245 | LVQSSNP | 7 |
| 302 | 320 | TSIETPWMDENPSTETAQA | 19 |
| 336 | 379 | LRTEGEHGEGATCETREESEDTESDGDDEELPRVVSRDGTKHRR | 44 |
| 397 | 454 | KGKERARETLAKAPRRTYGTPRPPVQKPRPEVPQSYETATSHGSAQVPEPPPTHPLHQ | 58 |
| 464 | 494 | AQNPRAPLGDQLPGVPKDGRGACAPVPALAG | 31 |
| 509 | 530 | GRAFAPVSPQPMPVEPVPVPTV | 22 |
| 535 | 578 | PVCPAPPEIAMQGPGEPSGIKRTRERWRPAPWTPNPPRSPSQMS | 44 |
| 590 | 632 | AQARQASVEVQPTQLTQVSPQQPMERPLEPEQQMFPGSPFSQV | 43 |
| 634 | 646 | DVARESGVPAMQP | 13 |
| 654 | 683 | TQPISQGAPAAPLRASMGPVPPVPATQPQY | 30 |
| 689 | 697 | TEPINQGAS | 9 |
| 704 | 712 | QQPMEGPLV | 9 |
| 723 | 734 | LSQSVRPGVAQS | 12 |
| 744 | 750 | PINHGAP | 7 |
| 757 | 766 | QPPMEGPWVP | 10 |
| 770 | 782 | MFQGAPPSQGTDV | 13 |
| 797 | 808 | LNHPGVPVSPAV | 12 |
| 821 | 838 | PIDEDESGEGSDTSEPYE | 18 |
| 847 | 866 | RPCPQAPEWPVQGEGGQDAT | 20 |
| 874 | 900 | HGRPRPRTPEWPVQGESGQNVTDHEPR | 27 |
| EBNA-3B | 9 | 46 | AQQADAGGASGSEDPPDYGDQGNVQQVGSDPISPAIGP | 38 |
| 49 | 93 | LSAASEDDPQSGPVEENLDAAAREEEEPDEQEHNGGDDPLEVHTR | 45 |
| 95 | 105 | PRFVDVNPTQA | 11 |
| 158 | 162 | PLPID | 5 |
| 190 | 196 | FETGGDK | 7 |
| 228 | 234 | MSDQNQK | 7 |
| 304 | 315 | TGRPSPSKPWMR | 12 |
| 319 | 335 | VAVPYDDPLTSEETDLA | 17 |
| 347 | 397 | ARLPDDPIIVEDDDESEEIEDKCDKDEEESGTEDVTSIPQTLPHSPTVYGR | 51 |
| 400 | 411 | VFYRKPDTKSTK | 12 |
| 429 | 470 | EHRKKKTARTEQPRAKPDSPAPTVVLRRPPTQKVTGPAGSLS | 42 |
| 474 | 485 | QLEPWQPLSWPH | 12 |
| 493 | 503 | GPPTQGDQAHG | 11 |
| 525 | 539 | LPPEPHQPRSGRRAP | 15 |
| 547 | 559 | DIESDEPATSEPV | 13 |
| 565 | 572 | PAPGLGPL | 8 |
| 576 | 627 | PLTSPTTSQLRSSAPSHAQTPWPVTHPSQTPGGPTTQSLAPETEAPRQWPMP | 52 |
| 643 | 662 | FNPAVRPTPHQPPQVEPTFY | 20 |
| 664 | 692 | STWVKPPQQYQPQMGHIPYQPRPTGHSTM | 29 |
| 696 | 964 | QWAPTTMQPPPRAPTPMPPPQGTPTAMQRPQGAPTPMPPPQGTPTAMQRPQGAPTPMPPPQGTPTAMQRPQGAPTPMPPPQGTPTAMQRPQGAPTPMPPPQGTPTAMQRPQGAPTPMPPPQGTPTAMQRPQGAPTPMPPPQGTPTAMQRPQGAPTPMPPPQGTPTAMQRPQGAPTPMPPPQGTPTAMQRPQGAPTPMPPPQGTPTAMQRPQGAPTPMPPPQGPLTAMQRPQGAPTPMPPPQGPLTAMQRPQGAPTPMPPPQGPPTAMQL | 269 |
| 968 | 976 | ALTGQKGPA | 9 |
| 988 | 994 | VKSGRPS | 7 |
| 1006 | 1021 | AAGLRPSPGSGTGAKI | 16 |
| 1044 | 1099 | SKAVAASTVTQAPTEYTGERRLGGPMSPTDIPPSKRVKKKAYPERKTPHGGPSHSS | 56 |
| 1106 | 1124 | VSQGQQQTLECGGTDKQER | 19 |
| EBNA-3C | 2 | 68 | ESFEGEGDSIQSPDNARGDDVQNTGEHIQDPGPGPSTGGASEGLVQNEPDSRDQQSRGQRRGDENRG | 67 |
| 92 | 106 | DNVPPWFPPHDITPY | 15 |
| 194 | 200 | PVPNRVG | 7 |
| 227 | 242 | WIPPPAGPREQERYAR | 16 |
| 313 | 333 | FKPYYPWNAPPNENPYHARRG | 21 |
| 356 | 402 | TGGGPRGDATSETSSDEDTGRQGSDVELESSDDELPYIDPNMEPVQQ | 47 |
| 413 | 429 | VRKPRTLPWPTPKTHPV | 17 |
| 437 | 473 | SYRSDEAEEAQSTPERPGPSKQPSEPVEPAHTTPAGR | 37 |
| 479 | 501 | HEPPREPEAVSFKPPPPPSRRRR | 23 |
| 517 | 662 | VETTEEETTSMQRQPPLGQQPPPPVISTGSAMSSSHTDPSVTQPSKPHRKPQDGFQRSGRRQKRAMPPPVSPSDAGPPSTRPRVMAPPSTGPRDMAPPSTGPRDMAPPSTGPRDMAPPSTGPRDMAPPSTGPRDMAPPSTGPRDMA | 146 |
| 676 | 686 | TQSTGPAPRSF | 11 |
| 691 | 719 | AGRDAPKIQQEPSSQQQPATQSTPPCQSW | 29 |
| 729 | 737 | VDAGNAQPL | 9 |
| 744 | 767 | SMSPTQPISHEEQPRYEDPDTPLD | 24 |
| 771 | 811 | HPDTATLPPTQDLYPGREDLQATQAPYPGYEEPRPPQAPFV | 41 |
| 821 | 885 | SAQWEPHPSQGTYQGHIDPQRPAALDLGPEQPRFPQDPYVYSGGQLSSCPGYAGPWPSRPQHPRY | 65 |
| 894 | 928 | REPRHGHSQGPWKPWSAHLPPQWDGSAGHGQDQVS | 35 |
| 933 | 943 | LHSETGPPRLQ | 11 |
| 956 | 988 | LVSSSAPSWSSPQPRAPIRPIPTRFPPPPMPLQ | 33 |
| 992 | 1016 | AVGCDSSGTACPSMPFASDYSQGAF | 25 |
| 1020 | 1053 | DINAPTPKSPRVEESSHGPARCSQATSEAQEILS | 34 |
| BZLF2 | 30 | 37 | RVRGGGRV | 8 |
| 49 | 97 | SAAAITWVPKPNVEVWPVDPPPPVNFNKTAEQEYGDKEIKLPHWTPTLHTFQVPKNYTKA | 49 |
| 146 | 158 | PDILPVVTRNLNA | 13 |
| 170 | 183 | GEGNWTSLDGGTFK | 14 |
| 198 | 209 | FSTVPVSHHECS | 12 |
| BZLF1 | 5 | 20 | NSTSEDVKFTPDPYQV | 16 |
| 27 | 43 | DQATRVYQDLGGPSQAP | 17 |
| 53 | 62 | PEPLPQGQLT | 10 |
| 71 | 123 | TGSWFPAPQPAPENAYQAYAAPQLFPVSDITQNQQTNQAGGEAPQPGDNSTVQ | 53 |
| 135 | 185 | ANQGQQLADIGAPQPAPAAAPARRTRKPLQPESLEECDSELDIKRYKNRVA | 51 |
| 201 | 213 | REVASAKSSENDR | 13 |
| 222 | 241 | CPSLDVDSIIPRTPDVLHED | 20 |
| BRLF1 | 5 | 14 | KDGLEDFLRL | 10 |
| 32 | 44 | VLNKEFTAGSVEI | 13 |
| 85 | 96 | NRVRRRAENAGN | 12 |
| 180 | 186 | EKEGLLS | 7 |
| 200 | 576 | PVLEEMFQTMVSSKTGHLTDDVKDVRALIKTLPRASYSSHAGQRSYVSGVLPACLLSTKSKAVETPILVSGADRMDEELMGNDGGASHTEARYSESGQFHAFTDELESLPSPTMPLKPGAQSADCGDSSSSSSDSGNSDTEQSEREEARAEAPRLRAPKSRRTSRPNRGQTPCPSNAEEPEQPWIAAVHQESDERPIFPHPSKPTFLPPVKRKKGLRDSREGMFLPKPEAGSAISDVFEGREVCQPKRIRPFHPPGSPWANRPLPASLAPTPTGPVHEPVGSLTPAPVPRPLDPAPAVTPEASHLLEDPDEETSQAVKALREMADTVIPQKEEAAICGQMDLNHPPPRGHLDELTTTLESMTEDLNLDSPLTPELNE | 377 |
| BRRF1 | 5 | 14 | NRGNARPLKS | 10 |
| 20 | 45 | YLKHYPEVGDVVHLLNTIGVDCDLPP | 26 |
| 67 | 73 | QHKLLED | 7 |
| 92 | 119 | YYSPKDEQRDIAEVLDHLKTNRDLGLDD | 28 |
| 129 | 144 | RQDRHHASVNVLMPGS | 16 |
| 194 | 201 | GPSEEPCA | 8 |
| 251 | 264 | ISQDGMRLFQHSRP | 14 |
| BRRF2 | 25 | 35 | SDFITGQDVTL | 11 |
| 47 | 55 | AINQTPGGG | 9 |
| 71 | 81 | PTSGRQSSRDD | 11 |
| 102 | 113 | PGETSHKDTPES | 12 |
| 143 | 164 | KAIKPGLYEIPRIIPHTKQCSP | 22 |
| 180 | 186 | GHVQLAY | 7 |
| 195 | 204 | FHEIPDLDDS | 10 |
| 233 | 258 | SMSLKQALSGHWMSATGNPLPAAPET | 26 |
| 264 | 289 | EAFRNSDNHFYLPTTGPLNTFKFPEE | 26 |
| 312 | 365 | TRGVGAGVPRPRFLALPPAPSREPQQTCSQLTSRGNESSRRNLGQPGGTSPAVP | 54 |
| 369 | 533 | PIVSLTASGAKQNCGGMGSLNSAQPEGTPPAVSPVCPIASPAASRSKQHRGVTGSSQAAPSSSSVAPVASLSGDLEEEEEGSRESPSLPSSKKGAEEFEAWLEAQDANLEDVQREFSGLRVIGDEDEDGSEDGEFSDLDLSDSDHEGDEGGGAVGGGRSLHSLYS | 165 |
| EBNA-1 | 1 | 79 | MSDEGPGTGPGNGLGQKEDTSGPDGSSGSGPQRRGGDNHGRGRGRGRGRGGGRPGAPGGSGSGPRHRDGVRRPQKRPSC | 79 |
| 84 | 441 | GAHGGTGAGGGAGAGGAGAGGAGAGGAGAGGAGAGGAGAGGAGAGGAGAGGGAGAGGGAGAGGGAGAGGGAGAGGGAGAGGGAGAGGGAGAGGGAGAGGGAGAGGGAGAGGGAGAGGGAGAGGGAGAGGGAGAGGGAGAGGGAGAGGEGRRAGAGGAGAGGGAGAGGAGAGGGAGAGGGAGAGGGAGAGGGAGAGGGAGAGGGAGAGGGAGAGGGAGAGGEAGRGGAGAGGGAGAGGGAGAGGGAGAGGGAGAGGGAGAGGGAGAGGGAGAGGGAGAGGGGRGRGGSGGRGRGGSGGRGRGGSGGRGRGRERARGGSRERARGRGRGRGEKRPRSPSSQSSSSGSPPRRPPPGRRPFF | 358 |
| 444 | 514 | VGEADYFEYHQEGGPDGEPDMPPGAIEQGPADDPGEGPSTGPRGQGDGGRRKKGGWFGKHRGQGGSNQKFE | 71 |
| 530 | 538 | ERTTDEGTW | 9 |
| 577 | 590 | GMAPGPGPQPGPLR | 14 |
| 619 | 627 | MPKPAPTCN | 9 |
| BKRF2 | 28 | 45 | CCHVTQLRAQHLLALENI | 18 |
| 65 | 74 | NSPKNGSNQL | 10 |
| 95 | 106 | RSSSALTGHLRE | 12 |
| 113 | 134 | TLYGSFSVEDLFGANLNRYAWH | 22 |
| BKRF3 | 7 | 33 | DLWLDEHVWKRKQEIGVKGENLLLPDL | 27 |
| 35 | 48 | LDFLQLSPIFQRKL | 14 |
| 124 | 136 | RSLPDFSPPDHGC | 13 |
| 157 | 165 | GKPGSHADI | 9 |
| 196 | 203 | DKASLINS | 8 |
| 217 | 235 | LAQNSTRKSAQQKFLGNNH | 19 |
| 245 | 251 | EKGLGEI | 7 |
| BKRF4 | 5 | 214 | LKSRGVRSCRDRRLLSDEEEETSQSSRYTLGSQASQSIQEEDVSDTDESDYSDEDEEIDLEEEYPSDEDPSEGSDSDPSWHPSDSDESDYSESDEDEATPGSQASRSSRVSPSTQQSSGLTPTPSFSRPRTRAPPRPPAPAPVRGQASAPPRPPAPVQQSTKDKGPHRPTRPVLRGPAPRRPPPPSSPNTYNKHMMETTPPIKGNNNYNW | 210 |
| BBLF4 | 37 | 62 | KRRVQQLPDLETFSPEFDPELSEPPF | 26 |
| 119 | 149 | FGFKSRHINMTQRVSSHGRSTDAALEELQRR | 31 |
| 167 | 193 | RTKPRGLYSGVSGPAFEVLRDMHQGQL | 27 |
| 247 | 265 | QTDAFQSSFSHETQVNKIR | 19 |
| 327 | 343 | RFVVPRAAIMDPTQYVG | 17 |
| 368 | 381 | AGQGRAARGTGGDG | 14 |
| 406 | 413 | LVGLPGLT | 8 |
| 417 | 443 | WLQKNYARLGNYSQFADQDMVPVGTEQ | 27 |
| 490 | 499 | SFVEAHGHEQ | 10 |
| 522 | 530 | GHSLCENGE | 9 |
| 538 | 570 | VPLPGRTWDPEVTAGMELGELPLEVAWDGERSP | 33 |
| 580 | 587 | APPAANSA | 8 |
| 615 | 621 | GREFRDL | 7 |
| 670 | 684 | FGIRGKQQPQDAGSS | 15 |
| 781 | 791 | LSEMITGEGNP | 11 |
| BBRF1 | 4 | 16 | MNVDESASGALGS | 13 |
| 35 | 42 | QGKYAYVQ | 8 |
| 86 | 101 | ACIQKRWPSDDSCASR | 16 |
| 130 | 139 | LHSRSVLSYE | 10 |
| 156 | 173 | KPITQELHSKIKSLRDRC | 18 |
| 302 | 312 | EQNSQRKDPKK | 11 |
| 323 | 333 | ENKTISGVTDV | 11 |
| 338 | 366 | ITDASNNLVDRNRLFGQPGETAAQGLKKK | 29 |
| 380 | 402 | NEQFDQINGLEKERELYLKKIRS | 23 |
| 412 | 438 | GPGGNNPAASAPAAVAAEAASVDILTG | 27 |
| 448 | 462 | FNSPSASLGARVSGH | 15 |
| 474 | 488 | YIPPSREMTKDLTEL | 15 |
| 498 | 510 | KLTPVVDNQGQRL | 13 |
| 573 | 610 | CPASATGGDHGIRQAPSARGDAEPDHAKSKPARDPPPG | 38 |
| BBRF2 | 4 | 22 | GKHHQPGGTRSLTMQKVSL | 19 |
| 46 | 71 | EFYNARGDLNIRDLRAHVKARMISSQ | 26 |
| 86 | 97 | QVDHLNIFPHVF | 12 |
| 171 | 185 | LEEGAATPGPWNEGL | 15 |
| 195 | 202 | KRAPSEAR | 8 |
| 213 | 239 | GKMGCLARSPKDYCADLNKEEDANSGF | 27 |
| 253 | 259 | HFQCQTV | 7 |
| 267 | 274 | CLGSDTVS | 8 |
| BBLF2 / BBLF3 | 54 | 73 | QPPLGGSLEPPVVNAPSTTE | 20 |
| 120 | 129 | EDEQGLIFQP | 10 |
| 142 | 177 | GDDGRDQQPPPGDGFGSEVEGEQTCPHAQRHSESPG | 36 |
| 192 | 204 | TYSTETPDDPSPV | 13 |
| 220 | 233 | VSSDGATGRGGDAR | 14 |
| 293 | 301 | CPGGSDFQP | 9 |
| 315 | 327 | GRARPAFWHRAPH | 13 |
| 337 | 371 | NLGVSGTPLADALLGLDARSGQRRGSLLLQQIWPP | 35 |
| 381 | 395 | VCTREGGEGGGEDET | 15 |
| 425 | 442 | ARGAPVGTPDGGGQARDA | 18 |
| 498 | 508 | SAHPSEEPLAQ | 11 |
| 515 | 534 | KDSEDASRLDRDVMGGEATV | 20 |
| 589 | 600 | PEADKAPPSHDH | 12 |
| 611 | 619 | RLAPGRRRN | 9 |
| 632 | 640 | LRRAGLRLS | 9 |
| 650 | 664 | DGAHPAPCQTATEHG | 15 |
| BBRF3 | 50 | 66 | VDYGALNLTNYNLAHHL | 17 |
| 107 | 114 | KKVSGLTD | 8 |
| 175 | 193 | FSPVWVVKAQDNSIPQDTF | 19 |
| 330 | 402 | RQGTDYVPVSETVELELESEPRPRPSRTPSPGRNRRRSSTSSSSSRSTRRQRPVSTQALISSVLPMTTDSEEE | 73 |
| BBLF1 | 10 | 20 | RRVNSIGDVDG | 11 |
| 26 | 36 | YNDYEEFNLET | 11 |
| 42 | 64 | VEEGRACGETNEGLEYDEDSEND | 23 |
| BGLF5 | 5 | 14 | DELEDPMEEM | 10 |
| 27 | 41 | ETEAFVRNLDRPPQM | 15 |
| 58 | 67 | EFSGETGFCD | 10 |
| 73 | 83 | VQENDSQDGPS | 11 |
| 93 | 99 | AATDEQR | 7 |
| 135 | 154 | TIKNGPTKVFEPAPISTNHY | 20 |
| 232 | 244 | YLFSKSEFDPIYP | 13 |
| 274 | 282 | PDGRLPSEG | 9 |
| 286 | 307 | LTQDEAWNLKDVRKRKLGPGHD | 22 |
| 329 | 337 | PSENAGRIG | 9 |
| 370 | 382 | RHSGGGKPGRDCS | 13 |
| 449 | 467 | DNTFDTAPWVPSGLFADDE | 19 |
| BGLF4 | 5 | 32 | MAAELSPTNSSSSGELSVSPEPPRETQA | 28 |
| 48 | 85 | KHLKVTNIDDMTETLYVKLPENMTRCDHLPITCEYLLG | 38 |
| 106 | 112 | SVTELYH | 7 |
| 125 | 132 | ATAEDGQD | 8 |
| 155 | 170 | CSLQDYGHWHDGSIEP | 16 |
| 206 | 212 | TDTMWGM | 7 |
| 229 | 250 | NKMLDVRLKSSKGRQLYRLYCQ | 22 |
| 276 | 293 | AGHIPDPSACGPVGAQTA | 18 |
| 317 | 332 | HKIPYPNPDMGFDRSD | 16 |
| 352 | 380 | QMWNLNLDMGLTSCGESPCVDVTAEHMSQ | 29 |
| BGLF3.5 | 29 | 37 | DRFGRDHAL | 9 |
| 52 | 92 | LRRARETFESKQLISTYQRVVTATKTQFPKINYKQLERVEE | 41 |
| 108 | 150 | LEPFEEHGCEYGCGVEPDELLQQWRVECLPRTPSRDPGLFGEG | 43 |
| BGLF3 | 5 | 17 | VKADMPDDPMLAR | 13 |
| 56 | 115 | QDNRPWHEARSSGRVAEDDYDFSSLALELLPLNPRLPEEWQFGGQGWSSRMEPSQPEMGM | 60 |
| 147 | 157 | AHSHTWTSLVP | 11 |
| 173 | 188 | SHCEERHCVYAAARGK | 16 |
| 222 | 238 | DVRDWKGEDIAPPFDVS | 17 |
| 271 | 280 | LNAQYKRPVD | 10 |
| 293 | 307 | ERYMVDAVGNYREAS | 15 |
| BGRF1 / BDRF1 | 5 | 28 | SQRGRLTENLRNALQQDSTTQGCL | 24 |
| 69 | 105 | HYGPRPVFVASDESLPMFGASPALHTPVQVQMCLLPE | 37 |
| 111 | 127 | QRLLPPPNLEDSEALTE | 17 |
| 139 | 146 | LEDPNFLE | 8 |
| 162 | 168 | YKHKPAR | 7 |
| 207 | 217 | EEMTLEKLHIF | 11 |
| 274 | 286 | TKSFDSKRVEVNK | 13 |
| 311 | 317 | KNSIRGQ | 7 |
| 368 | 377 | LKDAQERLLN | 10 |
| 384 | 396 | QEHRQDFDMQDSM | 13 |
| 433 | 454 | MGDTSSLSQGSLSRTVRDDAIN | 22 |
| 463 | 470 | TLNPRVAG | 8 |
| 485 | 491 | TNNTSAS | 7 |
| 585 | 591 | DKTSSLQ | 7 |
| 647 | 654 | PIPLRDGT | 8 |
| 657 | 664 | YTGKQRNL | 8 |
| BGLF2 | 44 | 52 | VYVPQIAGP | 9 |
| 109 | 130 | FSDAVGEAVPVEIRGNPVVTCT | 22 |
| 139 | 155 | TTSTAVKTVEELQDITP | 17 |
| 210 | 218 | CVTCYGAGA | 9 |
| 224 | 235 | RGWTEDDSPGTS | 12 |
| 246 | 258 | ALNNDYVPITGHR | 13 |
| 278 | 285 | FNPPKMHP | 8 |
| BGLF1 | 5 | 13 | IDNQVLSGL | 9 |
| 30 | 38 | ELCPNRVPN | 9 |
| 66 | 72 | MLPGRPS | 7 |
| 142 | 216 | SAAAMQPMPIDPGPPGGAGIEHMPVAAAQVEHPKTYDLKQILLEITQEENRGEQRLGHVGSPALCLGLRLRAGAE | 75 |
| 218 | 287 | KAAAETSVPKHHPALENPSNIRGSAGGEGGGGRAGTGGTVGVGSGAPSRVPVSFSKTRRAIRESRALVRG | 70 |
| 304 | 329 | ELSAQGRLHRMTAVTHASPATDLAEV | 26 |
| 376 | 382 | YSRIYKN | 7 |
| 426 | 445 | YEEGASAWGKVIDSRPPGGL | 20 |
| BDLF4 | 4 | 25 | QGRLSLPRGEGGTDEPNPRHLC | 22 |
| 80 | 110 | GPHFQPALRPWTEIRQDTQDQRDKWEPEQVQ | 31 |
| 123 | 129 | YFLNENV | 7 |
| 161 | 169 | MLFRGASSE | 9 |
| 202 | 212 | RNKRYDAVAKR | 11 |
| BDLF3.5 | 6 | 35 | CSERQDKKRVTIGEREFGELLSWDPTDLPR | 30 |
| 46 | 57 | GLFEQEVSEVQR | 12 |
| BDLF3 | 4 | 10 | ARDKAGA | 7 |
| 19 | 183 | ETSLIWTSSGSSTASAGNVTGTTAVTTPSPSASGPSTNQSTTLTTTSAPITTTALLSTNTTTVTSTGTTVTPVPTTSNASTINVTTKVTAQNITATEAGTGTSTGVTSNVTTRSSTTASATTRITNATTLAPTLSSKGTSNATKTTAELPTVPDERQPSLSYGLP | 165 |
| 209 | 231 | TKNKPLDEALLTNAVTRDPSLYK | 23 |
| BDLF2 | 11 | 33 | GTVSHTISREEDGVVHERRVLAS | 23 |
| 42 | 181 | KAPAPRPREGRASTFHDFTVPAAAAVPGPEPEPEPHPAMPIHANGGGETKTNTQDQNQNQTTRARTNAKAEERTAEMDDTMASSGGQRGAPISADLLSLSSLTGRMAAMAPSWMKSEVCGERMRFKEDVYDGEAETLAEP | 140 |
| 215 | 221 | SFMPVGA | 7 |
| 223 | 238 | VLRGKGRDFGVPLSYG | 16 |
| 263 | 274 | PNNTDSLGGHGG | 12 |
| 301 | 315 | RTFNVTRANGRVERR | 15 |
| 344 | 372 | DGVGPEFGTIPTPSFKDVLAFRPSLVTNC | 29 |
| 374 | 413 | APLKTSVKGPNWSGAAGGMKRKQCRVDRLTDRSFPAYLEE | 40 |
| BDLF1 | 13 | 22 | LYTDEIAKMQ | 10 |
| 34 | 54 | THGTQNVQGLGLGQVYSIETV | 21 |
| 98 | 104 | QPFFQWH | 7 |
| 162 | 171 | QAPGNADMLD | 10 |
| 241 | 257 | EMVPDEIARIDLDDLSV | 17 |
| BcLF1 | 1 | 12 | MASNEGVENRPF | 12 |
| 102 | 113 | IAHGDGRRPSKQ | 12 |
| 145 | 152 | PETPVEYA | 8 |
| 199 | 210 | DPTFTERGFSKT | 12 |
| 266 | 277 | TYTTAKGGEPVG | 12 |
| 296 | 308 | EEADNQIMGPSSY | 13 |
| 340 | 366 | DSPEKAGSTKSDLPAVAAGVEDQPRVP | 27 |
| 388 | 398 | YNDTQSPYPLN | 11 |
| 414 | 421 | PNPKYTTS | 8 |
| 429 | 435 | NPTQQLP | 7 |
| 475 | 486 | NAAPAPRDRRET | 12 |
| 508 | 515 | DNKYAAPV | 8 |
| 553 | 559 | DAGERAR | 7 |
| 572 | 590 | PTPLAPAAFQEARGQQFET | 19 |
| 606 | 614 | VQDTAYDTA | 9 |
| 704 | 712 | DVVGDESVG | 9 |
| 799 | 805 | YVDEGHA | 7 |
| 903 | 920 | DNDVTQQLAPNPADKRTE | 18 |
| 975 | 985 | PQQRAVEAFNR | 11 |
| 996 | 1004 | WHRSPMGKY | 9 |
| 1072 | 1079 | PNVSRREA | 8 |
| 1098 | 1108 | GLSYSSTMTPA | 11 |
| 1132 | 1139 | AFGNQQVN | 8 |
| 1167 | 1177 | NVNGAPGLCHG | 11 |
| 1196 | 1205 | FQKSNSPRGR | 10 |
| 1227 | 1245 | HSRPDAAYEYRSTVNPWAS | 19 |
| 1259 | 1268 | YRQTAVPGLY | 10 |
| 1296 | 1307 | QRLGGHPATSNT | 12 |
| BcRF1 | 4 | 15 | GKREMGGGLEGF | 12 |
| 30 | 40 | SPPALPEDATL | 11 |
| 71 | 77 | INDCQEL | 7 |
| 89 | 118 | VPGPLGVQSLEHTDCEIWSSAHPDHAAHLP | 30 |
| 183 | 198 | VTRIPPCPPFSGREAR | 16 |
| 242 | 254 | HASPQTPFLTRSG | 13 |
| 269 | 280 | NISIQQCKAGDR | 12 |
| 322 | 350 | VSVGHQELSPLMSRSHGGQTDVRSGPDPA | 29 |
| 358 | 411 | RREDGAPKDPPLGPFGHPRGPGPAKSEDEESERRDAPPPPLDFSFQASRLVPVG | 54 |
| 515 | 531 | STLDLHGLENQSLVREN | 17 |
| 564 | 574 | SRVHGRTLEQH | 11 |
| 576 | 585 | IREITPIVTH | 10 |
| 603 | 610 | LRNRSQIQ | 8 |
| 643 | 656 | FDFSKRSIAHSKNR | 14 |
| 666 | 687 | HSANVTKLVVNERKTRLDILGR | 22 |
| 699 | 705 | VNLRQSP | 7 |
| 718 | 727 | LGLGRASVKR | 10 |
| 738 | 746 | KKTAPIHCR | 9 |
| BTRF1 | 52 | 66 | ASGLNVRESLPMTNM | 15 |
| 129 | 152 | DSCLNQIAPFSASEHPAFSMVESV | 24 |
| 155 | 206 | VRVDEGANTRRTIRDILEIPVTVLSSLQLSPTKSILKKAPEPPPPEPQATFDAAP | 52 |
| 218 | 230 | GRQVPKLGNAPAA | 13 |
| 270 | 276 | NLENIVQ | 7 |
| 286 | 296 | SDTISEAETKA | 11 |
| 321 | 335 | TSTLPDVVPDVNNPN | 15 |
| BXLF2 | 60 | 68 | NVTEDLASM | 9 |
| 87 | 116 | AEPVDIPAVSEGSMQVDASKVHPGVISGLN | 30 |
| 125 | 144 | PLEKQLFYYIGTMLPNTRPH | 20 |
| 204 | 212 | LPDLRGPFS | 9 |
| 235 | 249 | YANFHNYFVPNLKDM | 15 |
| 277 | 286 | GCREPELDTE | 10 |
| 306 | 313 | GETGNGCV | 8 |
| 337 | 350 | GATVKGMQSYGLER | 14 |
| 360 | 373 | KMEELGHLTTEKQE | 14 |
| 407 | 415 | HPLFQPLHT | 9 |
| 431 | 441 | ELRLNVTTQGP | 11 |
| 465 | 471 | GLALGTE | 7 |
| 483 | 508 | RFDLTRDKLLSMAPQEAMLDQAAVSN | 26 |
| 518 | 531 | SLEREDRDAWHLPA | 14 |
| 558 | 564 | REVRGSA | 7 |
| 585 | 613 | NKCSQGAVAGEPRQIPKIQNFTRTQKSCI | 29 |
| 643 | 652 | ILSSNYFDFD | 10 |
| BXRF1 | 14 | 21 | EVGAASLS | 8 |
| 54 | 67 | ALWREANVTEDLAS | 14 |
| 87 | 123 | AEPVDIPAVSEGSMQVDASKVHPGVISGLNSPACMLS | 37 |
| 203 | 211 | DLPDLRGPF | 9 |
| 236 | 245 | ANFHNYFVPN | 10 |
| 277 | 286 | GCREPELDTE | 10 |
| 340 | 347 | VKGMQSYG | 8 |
| 360 | 373 | KMEELGHLTTEKQE | 14 |
| 384 | 419 | PKAGVYSGLMDPTRGLCALSTHDLAKFHSLPPARKA | 36 |
| 435 | 452 | LKSWEQLASFLSLPPGPT | 18 |
| 492 | 506 | SNTANPQSVTRKAQR | 15 |
| 547 | 562 | LRTLQVEFPALGQKTL | 16 |
| 582 | 636 | WARLDRPRPTAQGHRPRTHVGPKPSQLTARVPRSARAGRAGGRKGQVGAVGQVCP | 55 |
| BVRF1 | 11 | 18 | PARLPRDT | 8 |
| 44 | 57 | REAERARSERWDRC | 14 |
| 96 | 131 | DGLESMQVRSPSTGGRSAPAPPSPSPAQPFTRLTGN | 36 |
| 162 | 169 | NINQWVPS | 8 |
| 184 | 200 | RRVFPKQLRGNLNFTNS | 17 |
| 245 | 264 | GGSSHQQRPLPASREELLEL | 20 |
| 277 | 283 | KAKSPGG | 7 |
| 288 | 313 | LTSGNKEARQSIAPLNRQAAYPPGTF | 26 |
| 327 | 343 | LLPTTAALNVPGAAGRD | 17 |
| 355 | 362 | FGEDVPPF | 8 |
| 391 | 401 | LAEAATRRLHL | 11 |
| 407 | 435 | QAMQRRKPAMASAGMPGAYPVQTLFRHGE | 29 |
| 473 | 493 | LMDGQAPSHYAINLTGQKFDT | 21 |
| 499 | 508 | NQKLLFHDPA | 10 |
| 540 | 549 | EILERQFSAS | 10 |
| BVLF1 | 8 | 15 | RGDDARMT | 8 |
| 27 | 36 | KNWPLCALRE | 10 |
| 72 | 80 | RVLARKVPD | 9 |
| 95 | 105 | FPAEALRPGNR | 11 |
| 133 | 144 | LRRAPDLSQVTL | 12 |
| 205 | 213 | ILSDAHDYE | 9 |
| 228 | 245 | GLTPLPETRDEKEAKPPC | 18 |
| 256 | 268 | PLQCEELAQLGAT | 13 |
| BVRF2 | 90 | 100 | DIAQSQRLPLP | 11 |
| 122 | 135 | PDIPQTTADGGKLS | 14 |
| 163 | 172 | LKHFSDLEPS | 10 |
| 182 | 194 | NAAKRESGCPEDH | 13 |
| 217 | 226 | TLRQDRGVAN | 10 |
| 237 | 314 | DAPDLQKPDKALQSPPPASTDPATMLSGNAGEGATACGGSAAAGQDLISVPRNTFMTLLQTNLDNKPPRQTPLPYAAP | 78 |
| 317 | 589 | PFSHQAIATAPSYGPGAGAVAPAGGYFTSPGGYYAGPAGGDPGAFLAMDAHTYHPHPHPPPAYFGLPGLFGPPPPVPPYYGSHLRADYVPAPSRSNKRKRDPEEDEEGGGLFPGEDATLYRKDIAGLSKSVNELQHTLQALRRETLSYGHTGVGYCPQQGPCYTHPGPYGFQPHQSYEVPRYVPHPPPPPTSHQAAQAQPPPPGTQAPEAHCVAESTIPEAGATGNSGPREDTNPQQPTTEGHHRGKKLVQASASGVAQSKEPTTPKAKSVSA | 273 |
| BdRF1 | 5 | 23 | NAGEGATACGGSAAAGQDL | 19 |
| 40 | 169 | DNKPPRQTPLPYAAPLPPFSHQAIATAPSYGPGAGAVAPAGGYFTSPGGYYAGPAGGDPGAFLAMDAHTYHPHPHPPPAYFGLPGLFGPPPPVPPYYGSHLRADYVPAPSRSNKRKRDPEEDEEGGGLFP | 130 |
| 195 | 329 | QALRRETLSYGHTGVGYCPQQGPCYTHPGPYGFQPHQSYEVPRYVPHPPPPPTSHQAAQAQPPPPGTQAPEAHCVAESTIPEAGATGNSGPREDTNPQQPTTEGHHRGKKLVQASASGVAQSKEPTTPKAKSVSA | 135 |
| BILF2 | 25 | 33 | FENVTAHAG | 9 |
| 45 | 64 | NESVSRIELGRGYTPGDGQL | 20 |
| 73 | 82 | NGTHITNGGY | 10 |
| 129 | 148 | HCNYSAGEEDDQYHANRTLT | 20 |
| 167 | 205 | VSHTTSTSHRPHRRPVSKRPTHKPVTLGPFPIDPWRPKT | 39 |
| 238 | 245 | WGRRRKGW | 8 |
| LF3 | 9 | 860 | CLAPGSGLGAHPHPPPERGSGPSGPGGPPGRPPSSRAGTPDPAAAGHPRRSGAADPADPVGHPAAPRAPGPEPRTRLQPATPRRSGAADPADPVGHPAAPRAPGPEPRTRLQPATPRRSGAADPADPVGHPAAPRAPGPEPRTRLQPATPRRSGAADPADPVGHPAAPRAPGPEPRTRLQPATPRRSGAADPADPVGHPAAPRAPGPEPRTRLQPATPRRSGAADPADPVGHPAAPRAPGPEPRTRLQPATPRRSGAADPADPVGHPAAPRAPGPEPRTRLQPATPRRSGAADPADPVGHPAAPRAPGPEPRTRLQPATPRRGGAADPADPVGHPAAPRAPGPEPRTRLQPATPRRSGAADPADPVGHPAAPRAPGPEPRTRLQPATPRRSGAADPADPVGHPAAPRAPGPEPRTRLQPATPRRSGAADPADPVGHPAAPRAPGPEPRTRLQPATPRRSGAADPADPVGHPAAPRAPGPEPRTRLQPATPRRSGAADPADPVGHPAAPRAPGPEPRTRLQPATPRRSGAADPADPVGHPAAPRAPGPEPRTRLQPATPRRSGAADPADPVGHPAAPRAPGPEPRTRLQPATPRRSGAADPADPVGHPAAPRAPGPEPRTRLQPATPRRSGAADPADPVGHPAAPRAPGPEPRTRLQPATPRRSGAADPADPVGHPAAPRAPGPEPRTRLQPATPRRSGAADPADPVGHPAAPRAPGPEPRTRLQPATPRRSGAADPADPVGHPAAPRAPGPEPRTRLQPATPRRSGAADPADPVGHPAAPPSSRAGTPDPAAAGHPPPERGSGPSGPGGPPGRPPSSRAGTPDPAAAGHPPPERGSGPSGPPGRPPSSRAGS | 852 |
| LF2 | 5 | 41 | YPGGAHAALASRRSSFRNSLRRLRPTEKPDTSFMRGV | 37 |
|  | 63 | 73 | AQCQELPPCPS | 11 |
|  | 77 | 95 | ILSFKLPSFSFNTTTYGSR | 19 |
|  | 163 | 184 | PGQSDIQLTRSCTQSGDKLNTS | 22 |
|  | 207 | 215 | AQHTPPFLK | 9 |
|  | 247 | 254 | PDLKREGP | 8 |
|  | 276 | 288 | YPKSHWRWDGEST | 13 |
|  | 379 | 390 | SISTIMRRYIQR | 12 |
|  | 408 | 425 | LPTFERINKTFNGNIVAS | 18 |
| LF1 | 129 | 150 | APRDGAGARAAEGQAAAAQGGK | 22 |
| 154 | 162 | WGRLSPSSP | 9 |
| 188 | 270 | RSEGVGIGKDCAQDHACPVPPQGHASSAADQAGVPERGRKRAHEGPGAGEAASAGRGDVALSQSRALLWRGLGWDTGRGRLAP | 83 |
| 273 | 281 | AMSRDAASG | 9 |
| 304 | 318 | PGPPTAREGCFLSMD | 15 |
| 336 | 342 | EHDAVVP | 7 |
| 417 | 424 | ERSDNLDA | 8 |
| 450 | 465 | LPVDELRPWPKLTPEE | 16 |
| RPMS1 | 5 | 65 | RRRARCPASAGCAYSARPPPLSTRGRRISAGSGQPRWWPWGSPPPPDTRYRRPGPGRRARS | 61 |
| 68 | 99 | HAGPRGRPPHSRTRARRTSPGAGGGGWRGGSC | 32 |
| BILF1 | 15 | 31 | VANMTSVNATEDACTKS | 17 |
| 128 | 136 | SRTPKRTSH | 9 |
| 162 | 184 | GPDANLNRGPNMCREGPTKGMHT | 23 |
| 248 | 260 | LGEAGSLGFDCTE | 13 |
| 298 | 309 | TVTARYFRRVPS | 12 |
| BALF5 | 16 | 23 | GLLKKPDK | 8 |
| 33 | 52 | FQTPGAAGVVDVRGPQPPLC | 20 |
| 60 | 70 | VVGGDEDGKGM | 11 |
| 75 | 91 | RAQEGTARPEADTHGSP | 17 |
| 111 | 119 | VIPSDKQGY | 9 |
| 280 | 290 | VRREDSSWPSY | 11 |
| 302 | 311 | EEGFPTATNE | 10 |
| 415 | 422 | RRPHDAGK | 8 |
| 481 | 488 | AAGPEGRR | 8 |
| 555 | 567 | PSASDRDGYQGAT | 13 |
| 604 | 611 | ITPGEEHR | 8 |
| 615 | 623 | LRPGEDYES | 9 |
| 665 | 671 | EDPRQRT | 7 |
| 732 | 747 | ALAPSPDAWAPLNPEG | 16 |
| 888 | 895 | TDLREGRV | 8 |
| 948 | 973 | PKGGVKGARKTEMAEDPAYAERHGVP | 26 |
| BALF4 | 19 | 46 | RLGAQTPEQPAPPATTVQPTATRQQTSF | 28 |
| 65 | 75 | DIQCPSFGTRE | 11 |
| 119 | 137 | NRHEEKFSVDSYETDQMDT | 19 |
| 157 | 163 | VDRDGVN | 7 |
| 185 | 192 | TELYDAPG | 8 |
| 212 | 219 | MAKSNSPF | 8 |
| 237 | 251 | DGKNEETFHERADSF | 15 |
| 256 | 272 | NYKIVDYDNRGTNPQGE | 17 |
| 329 | 342 | NTTVGIELPDAFKC | 14 |
| 348 | 369 | NKTMHEKYEAVQDRYTKGQEAI | 22 |
| 387 | 454 | PRSLATVKNLTELTTPTSSPPSSPSPPAPPAARGSTSAAVLRRRRRDAGNATTPVPPAAPGKSLGTLN | 68 |
| 581 | 587 | TKKMTEV | 7 |
| 607 | 617 | DYHHFKTIELD | 11 |
| 645 | 658 | SRDEQRASNVFDLE | 14 |
| 680 | 688 | NAVSNGRNQ | 9 |
| 769 | 792 | PGIDELAQQHASGEGPGINPISKT | 24 |
| 806 | 818 | QEQKRAAQRAAGP | 13 |
| 829 | 854 | RDRFPGLRRRRYHDPETAAALLGEAE | 26 |
| A73 | 7 | 26 | GFLKKEMKPETRLLNKPPTV | 20 |
| 40 | 93 | SRKMPSRSKTLEARCSSRPPCDSPACQTRDTGCPRRSGTGRRGWRARRLGKESW | 54 |
| 116 | 123 | FSASTASP | 8 |
| BALF3 | 85 | 97 | PGRKGTRVPPLRT | 13 |
| 186 | 194 | HGNPSTAEG | 9 |
| 207 | 257 | NPEPVSGLFENEVRQAGLGHLLEAEEKARPGGPEEGAVPGPGRPEAEGATR | 51 |
| 282 | 297 | NSGGHAIGATGQGEGG | 16 |
| 324 | 339 | AGARLTHLFDAVAPGA | 16 |
| 370 | 385 | HPQYRAILQKRNELYT | 16 |
| 395 | 421 | GRGEEEASRESPEVPRPAGAREPGPSG | 27 |
| 427 | 436 | LKRKEQYLRQ | 10 |
| 487 | 505 | VSGPWEDRRAGEGAAFENS | 19 |
| 513 | 520 | FTQTLSSE | 8 |
| 538 | 545 | AEESGLFP | 8 |
| 577 | 592 | IEPSDWIETSFNSFYS | 16 |
| 632 | 643 | ADAVSPGQALPP | 12 |
| BALF2 | 1 | 20 | MQGAQTSEDNLGSQSQPGPC | 20 |
| 71 | 78 | HRRPDPNC | 8 |
| 102 | 108 | IFEGPGL | 7 |
| 124 | 147 | YSALPRESSKPGDFFPEGLDPSAY | 24 |
| 192 | 200 | EVFPEGVPQ | 9 |
| 241 | 248 | SLQDQAKV | 8 |
| 255 | 267 | KEFPASTISHPDS | 13 |
| 290 | 301 | EASHETPASLNY | 12 |
| 309 | 316 | DCEGPEAR | 8 |
| 347 | 357 | VSKSTGQGKES | 11 |
| 370 | 382 | TLQEGTWDPCRRP | 13 |
| 384 | 401 | FSGWGGPDVTGTNGPGNY | 18 |
| 431 | 450 | KSSLTPVPETGSYVAGAAAS | 20 |
| 477 | 500 | PPVMSTQRRDPYVISGASGSYNET | 24 |
| 512 | 525 | KEDDGQRPDDEPRY | 14 |
| 546 | 558 | EGKLEKEPHGPRD | 13 |
| 638 | 653 | ENDNPGLGQSPPEWLK | 16 |
| 679 | 691 | KVVHGEPTCDLPD | 13 |
| 786 | 798 | SVPVPSGASAEEY | 13 |
| 808 | 815 | GSRAHEES | 8 |
| 856 | 868 | PRTQSVPARDYPH | 13 |
| 875 | 888 | VESAAAYAEATSSL | 14 |
| 920 | 928 | YTGVNGNNQ | 9 |
| 952 | 964 | GAGLRKQAGGSSM | 13 |
| 982 | 989 | RTQAATTY | 8 |
| 1075 | 1083 | WGGPGAAQD | 9 |
| 1090 | 1098 | EPVSTASQA | 9 |
| 1106 | 1116 | GGGQGSGGRRK | 11 |
| BALF1 | 7 | 17 | LDSPHPGLASY | 11 |
| 28 | 48 | SLKPVSWPDETMRPAKSTDSV | 21 |
| 53 | 68 | PVEAWVAPSPPDDKVA | 16 |
| 116 | 126 | CRTADIGGKDT | 11 |
| 194 | 204 | GGMPRSLRRQF | 11 |
| BARF1 | 34 | 57 | YWRRVSLGPEIEVSWFKLGPGEEQ | 24 |
| 108 | 121 | LGETEVTKQEHLSV | 14 |
| 128 | 139 | SVHSERSQFPDF | 12 |
| 151 | 159 | FPHPHVQWL | 9 |
| 161 | 183 | PEGVEPAPTAANGGVMKEKDGSL | 23 |
| 204 | 212 | KNDKEEAHG | 9 |
| BNLF2b | 19 | 87 | RRMSKRSKNKAKKERVPVEDRPPTPMPTSQRLIRRNALGGGVRPDAEDCIKRCHPLEPALGVSTKNFDL | 69 |
| BNLF2a | 5 | 39 | LERTLLEQQSSACGLPGSSTETRPSHPCPEDPDVS | 35 |
| LMP-1 | 4 | 22 | DLERGPPGPRRPPRGPPLS | 19 |
| 188 | 378 | GQRHSDEHHHDDSLPHPQQATDDSSHESDSNSNEGRHHLLVTGAGDGPPLCSQNLGAPGGGPDNGPQDPDNTDDNGPQDPDNTDDNGPQGPDNTDDNGPQGPDNTDDNGPHDPLPHNPSDSAGNDGGPPELTEEVEKKGGDRGPPSMTDGGGGHSHDSGRGGGDPHLPTLLLGTSGSGGDDDDPHGPVQLS | 191 |

The core similar sequences are marked with the red color. To facilitate alignment, some short epitope sequences are filled up to at least 15 aa by adding flanking sequences and marked with the blue color.

**Extended Data Table 2 | Epitopes of rubella virus.**

| **Protein** | **Start** | **End** | **Epitope** | **Length** |
| --- | --- | --- | --- | --- |
| RUBVgp1 | 6 | 14 | DEVLAPGGP | 9 |
| 58 | 67 | FTQMQVSDHP | 10 |
| 78 | 86 | RHWIEWGPK | 9 |
| 154 | 163 | PEDVPHGGRA | 10 |
| 219 | 243 | DGGCPADCRGAGAGPTPGYTRPCTT | 25 |
| 246 | 258 | YQVLPDTAHPGRL | 13 |
| 299 | 313 | RHVRSLQPSARVRLP | 15 |
| 321 | 329 | VGRWRWFSL | 9 |
| 343 | 356 | TLSPDAYYSERVFK | 14 |
| 373 | 382 | QEGWKGTCAE | 10 |
| 433 | 449 | LGSVPLAERMEEWEQDA | 17 |
| 451 | 478 | VAAFDRGPLEDGGRHLDTVQPPKSPPRPEIAATWIV | 28 |
| 501 | 519 | CDVPRERPSAPAGQPDDEA | 19 |
| 529 | 561 | RRALRCREWDFEALRARADTAAAPAPPAPRPARYPTVL | 33 |
| 595 | 604 | LGQPLRGPER | 10 |
| 628 | 637 | PPERPWADGG | 10 |
| 681 | 687 | LAQQGAA | 7 |
| 696 | 816 | PGGAAFDANAVTAAVRAGPRQSAAASPPPGDPPPPRRARRSQRHSDARGTPPPAPARDPPPPAPSPPAPPRAGDPVPPIPAGPADRARDAELEVACEPSGPPTSTRADPDSDIVESYARAA | 121 |
| 898 | 908 | RPRDPAALEEG | 11 |
| 987 | 1036 | AGLAARRVSPPPTEPLASCPAGDPGRPAQRSASPPATPLGDATAPEPRGCQG | 50 |
| 1040 | 1048 | CRYTRVTND | 9 |
| 1058 | 1067 | RDRGATSWAM | 10 |
| 1081 | 1118 | ATHFPLNHYSVLKPAEVRPPRGMCGSDMWRCRGWHGMP | 38 |
| 1133 | 1149 | PSNAHAALCRTGVPPRASTRGGELDP | 17 |
| 1172 | 1218 | SAGCPKCAYGRALSEARTHEDFAALSQRWSASHADASPDGTGDPLDP | 47 |
| 1233 | 1239 | GSEHEAP | 7 |
| 1282 | 1290 | PRRVSDRPH | 9 |
| 1296 | 1302 | PLSRGGG | 7 |
| 1308 | 1327 | DEGLAQAYYDDLEVRRLGDD | 20 |
| 1338 | 1344 | QRPRKGP | 7 |
| 1387 | 1396 | LRARDIDIKN | 10 |
| 1445 | 1470 | DQCGPHYANNCRTPVPDRWPTERSRH | 26 |
| 1483 | 1490 | RAGLDYDI | 8 |
| 1502 | 1508 | LWDGRQV | 7 |
| 1549 | 1558 | RDGTDVALAL | 10 |
| 1580 | 1588 | EDGSLRAAG | 9 |
| 1599 | 1696 | AELKEVPAGIDRVVAVEQAPPPLPPADGIPEAQDVPPFCPRTLEELVFGRAGHPHYADLNRVTEGEREVRYMRISRHLLNKNHTEMPGTERVLSAVCA | 98 |
| 1698 | 1705 | RRYRAGED | 8 |
| 1716 | 1728 | VARQHPRPFRQIPPPRVTAGVAQEW | 13 |
| 1735 | 1772 | QEWRMTYLRERIDLTDVYTQMGVAARELTDRYARRYPE | 38 |
| 1778 | 1788 | CTAQSLSVPAF | 11 |
| 1799 | 1812 | ALGPRDTEDCHAAQ | 14 |
| 1878 | 1886 | TEFDMNQTL | 9 |
| 1916 | 1924 | YCTLRELGS | 9 |
| 1974 | 2004 | PEGARSAALKWTPAEVGLFGFHIPVKHVSTP | 31 |
| 2031 | 2039 | CRRFDPDVL | 9 |
| 2103 | 2113 | IQTPYARANLH | 11 |
| RUBVgp2 | 6 | 18 | PITMEDLQKALEA | 13 |
| 28 | 132 | AAGASQSRRPRPPRQRDSSTSGDDSGRDSGGPRRRRGNRGRGQRRDWSRAPPPPEERQETRSQTPAPKPSRAPPQQPQPPRMQTGRGGSAPRPELGPPTNPFQAA | 105 |
| 134 | 150 | ARGLRPPLHDPDTEAPT | 17 |
| 175 | 187 | TNLGTPPLDEDGR | 13 |
| 195 | 202 | RWDPALMYNPCGPEPPAHVVRAYNQ | 8 |
| 207 | 238 | RAYNQPAGDVRGVWGKGERTYAEQDFRVGGTR | 32 |
| 247 | 273 | VRGLDGDSAPLPPHTTERIETRSARHP | 27 |
| 299 | 332 | RAGLQPRADMAAPPTLPQPPCAHGQHYGHHHHQL | 34 |
| 348 | 360 | GQHYRNASDVLPG | 13 |
| 371 | 380 | NLSDWHQGTH | 10 |
| 394 | 434 | MDFWCVEHDRPPPATPTPLTTAANSTTAATPATAPAPCHAGLNDSCGG | 41 |
| 439 | 450 | CGPMRLRHGADT | 12 |
| 462 | 468 | TAQYPPT | 7 |
| 493 | 519 | GWTCRGVPAHPGARCPELVSPMGRATC | 27 |
| 638 | 646 | DVSCEGLGA | 9 |
| 651 | 661 | APCARIWNGTQ | 11 |
| 685 | 710 | NPGGSYYKQYHPTACEVEPAFGHSDA | 26 |
| 764 | 773 | HPFCNTPHGQ | 10 |
| 776 | 784 | VQVPPDPGD | 9 |
| 791 | 852 | NYTGNQQSRWGLGSPNCHGPDWASPVCQRHSPDCSRLVGATPERPRLRLVDADDPLLRTAPG | 62 |
| 874 | 922 | RAGPYGHATVEMPEWIHAHTTSDPWHPPGPLGLKFKTVRPVALPRTLAP | 49 |
| 937 | 947 | PALVEGLAPGG | 11 |
| 957 | 1000 | EDLGAVPPGKFVTAALLNTPPPYQVSCGGESDRATARVIDPAAQ | 44 |
| 1013 | 1020 | AVSETRQT | 8 |

The core similar sequences are marked with the red color. To facilitate alignment, some short epitope sequences are filled up to at least 15 aa by adding flanking sequences and marked with the blue color.

**Extended Data Table 3 | Epitopes of variola virus.**

| **Protein** | **Start** | **End** | **Epitope** | **Length** |
| --- | --- | --- | --- | --- |
| GP001 | 17 | 25 | KDSLNTVAD | 9 |
| 39 | 50 | HRWTHRESAGSL | 12 |
| 77 | 86 | PWDNIDNCVE | 10 |
| 91 | 98 | FIRNDSMK | 8 |
| 118 | 124 | GRVFNDK | 7 |
| 137 | 143 | NENDYFT | 7 |
| GP002 | 19 | 47 | ANSGNAIETTLSEITNTTTDIPAIRLCGP | 29 |
| 75 | 96 | YTGIRCQHVVLVDYQRSEKPNT | 22 |
| 126 | 136 | TRRTNKLPLQD | 11 |
| GP003 | 4 | 10 | YNDKGLQ | 7 |
| 27 | 36 | RELFKHVTDS | 10 |
| 80 | 94 | PNDDNKRTCSNWVPL | 15 |
| 120 | 126 | HPTGNIK | 7 |
| 136 | 146 | TLDFKSKKVLT | 11 |
| 162 | 172 | RSMTTIHYGDV | 11 |
| 219 | 233 | HLGIGIVKDKRISDS | 15 |
| 266 | 273 | NIAWDTDKLDDDTDIWTPVT | 8 |
| 295 | 301 | KSQSDTV | 7 |
| GP004 | 5 | 27 | PTKINISSIDHVTILQYIDEPND | 23 |
| 52 | 66 | PHLANQFRAWKKRIA | 15 |
| 134 | 171 | DNNTYTPNTPNNTTTISELDIIKILDKYEDVYKVSKEK | 38 |
| 180 | 196 | VYSKRLENDRYFGLLDS | 17 |
| 210 | 224 | HRTRRETGASDNCPI | 15 |
| 230 | 238 | RNITMSKFY | 9 |
| GP005 | 22 | 36 | ETKCPNLDIVTSSGE | 15 |
| 44 | 50 | EHMPKFS | 7 |
| 58 | 90 | DMKSDEYAKFIEHLGDGIKEDETIRTTDGGITT | 33 |
| 99 | 105 | DTNKFAH | 7 |
| 115 | 123 | LNGVSKKNI | 9 |
| GP006 | 22 | 32 | RDPNDTRNQFK | 11 |
| 59 | 68 | TNPLHKNWRH | 10 |
| 93 | 101 | EATGFSNIN | 9 |
| 127 | 135 | FDLSVKCEN | 9 |
| 162 | 173 | CNVLYEDDEYGY | 12 |
| 195 | 205 | LYSESDTRAYV | 11 |
| 218 | 226 | IKPSSIDKN | 9 |
| 253 | 262 | DNTAYSYIDD | 10 |
| 279 | 294 | YRYNEDVNLDLVKLFL | 16 |
| 322 | 331 | KTMNSNILQH | 10 |
| 355 | 364 | AVVNKEAIHG | 10 |
| 382 | 394 | KKGGDVINYLDDG | 13 |
| 406 | 427 | YGCYNFYTYIYKKGLCVMSYAC | 22 |
| 441 | 449 | KDINMIDKR | 9 |
| GP007 | 6 | 13 | CKTFDACS | 8 |
| 16 | 37 | SLVERNENSLNVYVTKKNKNIK | 22 |
| 48 | 67 | TNYKNINDFDIFEYIESDNI | 20 |
| 80 | 101 | LEINSCKNGINIVEKYATTSNP | 22 |
| 111 | 138 | DQGIPMCSNVSYGYKIIIEKKLLTSQVG | 28 |
| GP008 | 16 | 28 | ALRNLQLHRGDNY | 13 |
| 102 | 110 | DDENELFKH | 9 |
| GP009 | 4 | 16 | YNKADSFSLESDS | 13 |
| 32 | 39 | DEMRPSIG | 8 |
| 46 | 73 | ETFKIDAVRYYDGNIYDLAKDINAMSFD | 28 |
| 81 | 87 | NISSKKD | 7 |
| 143 | 152 | RRIQRRYPIDDDEEDR | 10 |
| GP010 | 5 | 40 | MNRLDLDKLKHENIFSGNIIEDAKEFVFGSRKIYTD | 36 |
| 56 | 62 | NNEKLKD | 7 |
| 87 | 96 | FYKENGLRNS | 10 |
| 103 | 122 | NNNIEEIRNTDQFLKFDVDS | 20 |
| GP011 | 6 | 14 | IFNHGEFDT | 9 |
| 26 | 35 | VKWNTINSNV | 10 |
| 76 | 84 | RFNDTTLTD | 9 |
| 120 | 134 | MFSKSLNFRFENVKR | 15 |
| 149 | 157 | PSICRIQYD | 9 |
| 208 | 218 | YTRFRKNHIYD | 11 |
| 251 | 261 | DNDKLESGNNT | 11 |
| 264 | 271 | PKTDDEYK | 8 |
| 279 | 286 | IAKFNNTK | 8 |
| GP012 | 13 | 48 | GIGCVLSCCTIPSRPINMTFKNSVETDANANYNIGD | 36 |
| 58 | 68 | YRKQKMGPIYA | 11 |
| 70 | 94 | CTGTGWTLFNQCIKRRCPSPRDIDN | 25 |
| 96 | 105 | HLDIGGVDFG | 10 |
| 128 | 169 | LGSTGSMVWNPKAPICESVKCQLPPSISNGRHNGYNDFYTDG | 42 |
| 193 | 228 | GEWSNPPTCQIVKCPHPTILNGYLSSGFKRSYSYND | 36 |
| 252 | 259 | NTWQPELP | 8 |
| GP013 | 40 | 52 | SKWIRHPNLITPR | 13 |
| 72 | 79 | TTYEKYVI | 8 |
| 88 | 100 | KNCWIKKSPMPRH | 13 |
| 135 | 147 | DKWIELYMYFNHV | 13 |
| 171 | 183 | PKSNTWICSMCQL | 13 |
| GP014 | 5 | 23 | KWIHKNPNDVDIINSLHPK | 19 |
| 34 | 46 | SKSTKPVTRNGIK | 13 |
| 59 | 68 | STITHYSPRT | 10 |
| GP015 | 36 | 47 | LSDRDYTSITKE | 12 |
| 78 | 90 | VDIDIETKLKPKP | 13 |
| 118 | 154 | EQDIPLGPLFKKIDSYRIRAINKYSKELGLATEYFNK | 37 |
| 200 | 209 | SIDDRRKFKK | 10 |
| GP016 | 13 | 25 | NDGDPSYYNDDFE | 13 |
| 48 | 68 | MTLSDGPLLDRLNQPVNNVED | 21 |
| 82 | 92 | DIGERPEIRWE | 11 |
| GP017 | 5 | 13 | TMDNNEPKV | 9 |
| 18 | 31 | YDSPILPEGSSMDP | 14 |
| 64 | 71 | NKDELNNT | 8 |
| 102 | 109 | RKRPNQHH | 8 |
| 118 | 128 | KRTRYDTFKVD | 11 |
| GP018 | 33 | 39 | EPSGNYH | 7 |
| 62 | 71 | GYSPNETDDDGNYPLH | 10 |
| 97 | 105 | DPNACDKQH | 9 |
| 131 | 139 | AKINNSVDE | 9 |
| 164 | 173 | FEARIVDKFG | 10 |
| 199 | 208 | ISPSKPDHDG | 10 |
| 233 | 242 | TDVNKQNKFG | 10 |
| 347 | 355 | FSVDSVVNG | 9 |
| 379 | 391 | PTSETMYLTMKAI | 13 |
| 414 | 422 | DFCKNRRYF | 9 |
| GP019 | 17 | 31 | SVEYKNTICPPRQDY | 15 |
| 48 | 54 | INSTIIG | 7 |
| 111 | 117 | RLDKVHH | 7 |
| 130 | 148 | CGTTKYNSDLPESIHHKSS | 19 |
| 165 | 193 | TDPTKINPHYLHPKDKYLYHNSKYGMRGS | 29 |
| 200 | 216 | DELNQCLLDIKELSYDI | 17 |
| GP020 | 49 | 57 | ANLENVLLD | 9 |
| 59 | 65 | AEIAKND | 7 |
| GP021 | 5 | 30 | RINTRKSKQLKSFLSSKDTFKADVHG | 26 |
| GP022 | 72 | 80 | DLRKIDLGP | 9 |
| 90 | 98 | AKPKTSKYT | 9 |
| 113 | 136 | CIKPSYYQQYHRFGLYRLNFRRDA | 24 |
| 146 | 160 | RRSGMSNVVDSTMLD | 15 |
| 178 | 195 | QYPFDITKTHNTSFTNKY | 18 |
| 241 | 249 | DNMTHFTDS | 9 |
| 291 | 311 | PSMFNPDNASFKHMTRDPLYI | 21 |
| 324 | 344 | EQGTVAEASTIMVATVRSSPE | 21 |
| GP023 | 46 | 57 | MHMNRYFKYRDK | 12 |
| GP024 | 18 | 25 | DEICSRDS | 8 |
| 56 | 72 | ELMKFDDAAIRYYGIDK | 17 |
| 89 | 97 | LTEVHDQES | 9 |
| 111 | 135 | HWGYKKISESRFQSLGNITDLMTDD | 25 |
| GP025 | 16 | 44 | DDIDDIDDIDDIDDIDDIDDIDDIDDIDD | 29 |
| 47 | 62 | DIDDIDDIDDIEDKASNNDHNY | 16 |
| 75 | 87 | NKSTNILDYLSTE | 13 |
| 101 | 114 | KQRLDDLYRQLPTK | 14 |
| 128 | 136 | KVNNDYNRD | 9 |
| 213 | 228 | DISPPDNTIPNISTRE | 16 |
| GP026 | 17 | 28 | NRAKSPTRQSPY | 12 |
| 125 | 143 | LKEVQSLDSTDRGDQGFGS | 19 |
| GP027 | 17 | 28 | NNWIPIPPMNSP | 12 |
| 63 | 72 | WVNMPSLLKP | 10 |
| 106 | 117 | DQWQFGPSTYYP | 12 |
| 144 | 157 | SNTWSLIDDTIYQR | 14 |
| GP028 | 30 | 54 | EASFWTVEEVDISKDINDWNKLTPD | 25 |
| 117 | 124 | KDSNEKNY | 8 |
| 143 | 151 | QKWIHDSAG | 9 |
| 239 | 249 | LPVKLIGMNCE | 11 |
| 268 | 315 | FKRIYNVTNPSDFMENISLEGKTNFFEKRVGEYQKMGVMSQEDNHFSL | 48 |
| GP029 | 83 | 97 | LRYEDSGSYKGVSHL | 15 |
| 159 | 189 | RWKYLPFPTDDYRYVGELKRYISGNPYPIES | 31 |
| 220 | 262 | YSFHKMLNARHICESEWEALNNNNDNSSSMPVSHNNRANDLSS | 43 |
| 267 | 282 | LQNDNDDNNDYSAPMN | 16 |
| 313 | 319 | RSKYSHI | 7 |
| GP030 | 13 | 22 | IDLIKNDQIK | 10 |
| 29 | 52 | IEESDSLLSVNEVYANHGFDCVEM | 24 |
| 58 | 68 | INENLEQYKTD | 11 |
| GP031 | 13 | 48 | CDAKNKFKKDDIEEEGEGYCDYKNLNDLDEATRIEF | 36 |
| 55 | 75 | NEEKSDINTLDIKRRYRHAIE | 21 |
| GP032 | 4 | 61 | SKRKHESRRPQQEQEQHRPRTPPSYEEIAKYGHSFNVKRFTNEEMCLKNDYPRIISYN | 58 |
| GP033 | 20 | 30 | QKLAQHSIPTN | 11 |
| 77 | 88 | LPEKDRRAIAEE | 12 |
| 90 | 98 | GIDLNDVPS | 9 |
| 111 | 119 | AEVNNIIDI | 9 |
| 126 | 132 | ECSAPPG | 7 |
| 159 | 174 | NKIYVPPIIENRLPYY | 16 |
| GP034 | 5 | 22 | NDSSPEYQWMSPHRLSDT | 18 |
| 37 | 46 | QLDLHQNWAP | 10 |
| 56 | 86 | NFNRETLLKIEENDYINSSFFQQKDKRFYPI | 31 |
| 117 | 125 | KLYSPMETT | 9 |
| 181 | 189 | GQELSLRYS | 9 |
| 237 | 246 | HEKRTNYEYE | 10 |
| 261 | 275 | DKVDTELAIKLGFKS | 15 |
| 344 | 365 | FDFSQVAGIINKKIKNNFKVEH | 22 |
| 384 | 390 | EIEKDIE | 7 |
| 404 | 419 | TDCDKYRLKVSILHPI | 16 |
| GP035 | 10 | 57 | KMLKRGSRKFSSMLARRHTPKKMNIVTDLENRLKKNSYIENTNQGNIL | 48 |
| 65 | 95 | TMSVETLFGSYITDDSDDYELKDLLNVTYNI | 31 |
| 126 | 139 | KHRDGFTKGALYLG | 14 |
| 214 | 225 | IPNISSNDNAKI | 12 |
| 269 | 297 | NLYANTIKESLLKETIQKDINITHTNITT | 29 |
| 307 | 320 | KLVKSLVDKEDTDI | 14 |
| 329 | 350 | IKNCGGVKNRDTIVNSLSLSNL | 22 |
| GP036 | 9 | 19 | MKTANNYETIE | 11 |
| 67 | 80 | HCTKLRSSPPIPMS | 14 |
| 84 | 100 | MDEIDHESYYSPKTSDY | 17 |
| 150 | 164 | KFNDYRKQMYRKFSK | 15 |
| 186 | 219 | LETYTRPEIDVLPFDIKYISRDELWAQISSSLDQ | 34 |
| 298 | 304 | PNNCGWK | 7 |
| 327 | 334 | SCGLSLQD | 8 |
| 337 | 365 | YHWGSKPESRPFDLIKKIDAKRNIKSWVK | 29 |
| 442 | 450 | IVNNQKSNK | 9 |
| 462 | 478 | SKQYPAGRPNYVKNGTK | 17 |
| 554 | 564 | IYDLNTVTTNN | 11 |
| 571 | 577 | ENINFNN | 7 |
| 618 | 627 | IRSSYKDINE | 10 |
| GP037 | 21 | 31 | ENMDFRSDHLT | 11 |
| 86 | 100 | RGKRNLGELQSHCPD | 15 |
| 106 | 115 | VNIDKKNNVG | 10 |
| 169 | 222 | AFNSVKNSWLNLYSSACCLPVSTAYHIKNPIGGVFFTDSPEHLLGYSRDLDTDV | 54 |
| 245 | 255 | TRVDGNSYYWP | 11 |
| 356 | 369 | KIFERDWVSSHSKS | 14 |
| GP038 | 5 | 15 | VYSEGLEISTD | 11 |
| 21 | 32 | SQLSTSDMDIEI | 12 |
| 49 | 60 | CDVDFDEDFSDI | 12 |
| GP039 | 5 | 39 | EEYCGLHKLKMEIFNVEELINMKPFKNMNKITINQ | 35 |
| 55 | 71 | TPRYIPLTSISSSNIIR | 17 |
| 88 | 95 | HFQQPQFQ | 8 |
| 123 | 127 | KYCISNRGDDDSLSINLFI | 5 |
| GP040 | 32 | 59 | SMQIVKEIEEFGTINEKNLEFATWKDVI | 28 |
| 104 | 113 | AFDGDPPSFR | 10 |
| 173 | 191 | INNSNGRGINIRVSNNKML | 19 |
| 200 | 214 | VNKLKMYKTTKCASQ | 15 |
| 222 | 228 | INKMDII | 7 |
| GP041 | 49 | 79 | DKPSSPASERRPSSPSRCERMNNPGKQVPFM | 31 |
| GP042 | 22 | 36 | LGRLPSVNEYHMLKL | 15 |
| 38 | 47 | TRNIQKITVF | 10 |
| 59 | 77 | NKKRFFSDVDTSASEIKDR | 19 |
| 80 | 91 | SYFSKQTQTYNI | 12 |
| 127 | 136 | ISYNVTSMEE | 10 |
| 146 | 163 | NVAVIDKAKVMGRHNVSS | 18 |
| 198 | 206 | IRYGDIDIL | 9 |
| 320 | 332 | HGIVFDGKRNNMP | 13 |
| 371 | 385 | LDLNADTSCDFESVT | 15 |
| 451 | 466 | KIPIYSHTERDKKHGR | 16 |
| GP043 | 12 | 21 | LDNECHTITK | 10 |
| 142 | 178 | KESIYRMSYQFSENEIVTIINRDHFMYEPIYEHQVLD | 37 |
| 229 | 236 | KNQLTEDS | 8 |
| 347 | 353 | NPVPVTS | 7 |
| 379 | 392 | EIDIDTLIEKGADP | 14 |
| 402 | 408 | WYNKHND | 7 |
| 446 | 458 | DENRGAIMFFPRT | 13 |
| 471 | 504 | KLIQKPIPFKEENRNIVYKKTNRVLCFDLLENSA | 34 |
| 541 | 549 | QESIHNEER | 9 |
| 586 | 595 | GREYTNPQKI | 10 |
| 606 | 613 | EEFIEYQN | 8 |
| 623 | 629 | ELEYTIS | 7 |
| 673 | 681 | KINELLSEP | 9 |
| 694 | 712 | DRASSGDSSFIFLKKNELS | 19 |
| GP044 | 5 | 13 | YIDERSDAE | 9 |
| 19 | 27 | IKNIGLEGV | 9 |
| 37 | 44 | NMEKREVN | 8 |
| 56 | 115 | VYSSDDIPPRWFMTTEADKPDAMTMADVIIDDVSREKSMREDHKSFDDVIPAKKIIDWKN | 60 |
| 137 | 145 | IESVGPSNS | 9 |
| 160 | 169 | DKADGKSKRD | 10 |
| GP045 | 5 | 19 | YISSYSSNEQTSMAV | 15 |
| 32 | 40 | VDDANLEDL | 9 |
| 57 | 74 | GNTKSNIEETKFESKNNI | 18 |
| 78 | 101 | YSKDSRNKLSYRNKPFIATNLEYK | 24 |
| 130 | 165 | KGVEYNIDKIKDVSYNDYFNVLNEKYNTPCPNCKSR | 36 |
| 191 | 239 | KQHFKPPKFRAFRNLNVTTQSIHKNKEITEILPDNNPSPPESPEPASPI | 49 |
| 249 | 256 | DRNDEPPE | 8 |
| GP046 | 28 | 86 | SQCPMINDDRFTLKRKYQIDSVESTMKMDKKRTKFQNRAKMVKEINQTIRAAQTHYETL | 59 |
| 94 | 117 | KKMIRTTTLEDITTSIPNIQKIYK | 24 |
| 162 | 172 | MSKIKHKIFSP | 11 |
| 185 | 195 | RFYNNECRSNK | 11 |
| 209 | 216 | AESDKYTI | 8 |
| 222 | 237 | LRPIYRIKGKSEEDTL | 16 |
| 245 | 251 | QCVTSQE | 7 |
| 266 | 285 | KSGEYKAYRYDDDVENGFIG | 20 |
| 296 | 304 | DIVEPCMPV | 9 |
| 320 | 330 | YFENPLHIIGK | 11 |
| GP047 | 49 | 56 | HVITKDVL | 8 |
| 124 | 135 | EYMEELGELIGV | 12 |
| 137 | 152 | YDLVLNPLFHGGEPIK | 16 |
| 187 | 201 | KDTGIEFADNDRQDI | 15 |
| 210 | 227 | RIVHSNLTETFRDYIFPG | 18 |
| 239 | 250 | SIANDADIVLNR | 12 |
| 269 | 275 | QGRVNKN | 7 |
| 325 | 341 | ANFINGNTFISDRTFNE | 17 |
| 354 | 380 | YFDNERIMSLFSTSAVEIKRFDELDIN | 27 |
| 390 | 402 | EVNDITLDTMDDM | 13 |
| 438 | 451 | LKKLSSIKSKSRRL | 14 |
| 544 | 556 | LDKSIHLTKTDKK | 13 |
| GP048 | 11 | 39 | NGCKDNKWMLEQLSTLNFNNLHVWNSCSI | 29 |
| GP049 | 6 | 35 | PRFDDVYKNAQRRILDQETFFSRGLGRPLM | 30 |
| 59 | 65 | YANLDAS | 7 |
| 86 | 106 | KGPIPVYEEKVNTEFIANGSF | 21 |
| 145 | 151 | NTQFDIT | 7 |
| 175 | 218 | QTGDYKPLFSRLKENYIFTGPVPIGIKDIDHPNLSRARSPSDYE | 44 |
| GP050 | 45 | 66 | EIYQSLAPPPFNARPMGKMRTI | 22 |
| 68 | 80 | IDETISYNLDIKD | 13 |
| 96 | 107 | KRNIQNATMDEF | 12 |
| 129 | 156 | DQYLTKINNGCYHCGDPRNCFAKEIPRF | 28 |
| 173 | 180 | KKFPSVFI | 8 |
| 206 | 231 | EMLTEQEIQEAVDRGCLRIQSLMEMD | 26 |
| 279 | 321 | LTGEKIIFRSPDKKEAVHLCIYERNQSSHKGVGGMANTTFHVN | 43 |
| 340 | 348 | KLDSYKLDS | 9 |
| 358 | 385 | GKVLNRGVREMTFIGDDTTDAKGKAAVF | 28 |
| 402 | 418 | CKVIHKDIWENGFKVVL | 17 |
| 425 | 451 | NDTYKLSFGKDDVDLAQMYKDYNLNIA | 27 |
| 514 | 529 | TILVRSETKQKFPYEG | 16 |
| 534 | 540 | APKQKMF | 7 |
| 564 | 620 | PETLVGVVVSSNRLEEEINNQLLLQKYPPPRYITVHCEPRLPNLISEIAIFDRSIEG | 57 |
| 638 | 650 | KMLKQATSSTEKA | 13 |
| 703 | 749 | GAELSNGMLRFANPLSNPFYMDDRDINPIVKTSLPIDYRFRFRSVYG | 47 |
| 812 | 821 | ASSNSKSVPE | 10 |
| 854 | 861 | SEGRMNSN | 8 |
| 894 | 904 | MHHLNYKSADN | 11 |
| 916 | 923 | NNPETIEL | 8 |
| 937 | 962 | VPWTKKLVNIKTYETIIDRSFKLGSD | 26 |
| 983 | 1002 | DNKVLCISFFERMFGSRPTF | 20 |
| GP051 | 22 | 28 | GLDGNIE | 7 |
| 57 | 65 | NNIMSSNDL | 9 |
| 80 | 91 | ASDPKYAIDVSK | 12 |
| GP052 | 19 | 25 | IKNTDDV | 7 |
| 65 | 90 | KGSISIVSNEFYVFDEPLLFVKDYTN | 26 |
| 120 | 126 | NHKFYNG | 7 |
| GP053 | 20 | 28 | LNIEKVSSK | 9 |
| 110 | 118 | YNLLTHSDL | 9 |
| 121 | 128 | LINENVIK | 8 |
| 135 | 150 | INAYMINFKIDLTVDE | 16 |
| 153 | 174 | DLVKDIPVGATLHLYNILNNLD | 22 |
| 195 | 201 | SKLTDEE | 7 |
| 211 | 228 | PMENVINFINQDVRYSPT | 18 |
| 255 | 262 | VIVDKDLI | 8 |
| 276 | 287 | EYKTDVDTLTLD | 12 |
| 297 | 309 | SYYDFRYRQFANE | 13 |
| 315 | 349 | MLKESRQITMQTGDKIRRFRRPMSLRSTIIKKDTD | 35 |
| 362 | 380 | RKNSKVSIEDVDRIISSFR | 19 |
| 443 | 480 | FKYLTSVDNKEITVCNCSRCVSLFYRELKSIRCDLNTD | 38 |
| 554 | 569 | SLSFKLSVDTMSVSND | 16 |
| GP054 | 37 | 68 | SFKRGAYEIVDIKEFKPENKLHDYFEQITGGR | 32 |
| GP055 | 34 | 54 | VTRKCPQKKKSQAKKPEVRIP | 21 |
| 64 | 70 | KKFGLCN | 7 |
| 87 | 126 | FFTKNGKLDDTGKKELVLTDVEKRILNTVDKSSPLYIDIS | 40 |
| 168 | 181 | SIQLDEKSSIKDSM | 14 |
| 196 | 207 | SFRSPQVKDNII | 12 |
| 236 | 242 | IASILSL | 7 |
| 267 | 292 | DRYSEKFQESFYEDIAEFVEENERVD | 26 |
| GP056 | 16 | 22 | PEDDLTD | 7 |
| 31 | 46 | LSDEKTVTSTNNTGCW | 16 |
| GP057 | 4 | 22 | VIKKRVETSPRPTASSDSL | 19 |
| 35 | 41 | ISKSNAK | 7 |
| 49 | 56 | NASQYANC | 8 |
| 65 | 71 | DSLSSQM | 7 |
| 83 | 96 | KLYKNKSKQDRSDG | 14 |
| 122 | 145 | KHKERIPNSLHSLLVETITEKTFK | 24 |
| 165 | 186 | GELSILRSIEGELESLSKRERQ | 22 |
| 237 | 265 | ENVEEDLARNLGLVDIDDEYDEDSDKEKP | 29 |
| GP058 | 5 | 15 | KRNGYKENVMF | 11 |
| 48 | 55 | YNGVTTVE | 8 |
| 106 | 119 | NPKNGKHSPIISSI | 14 |
| 121 | 146 | MDVVNKYKDKLNSVIIYERDFSYNYF | 26 |
| 255 | 269 | IRASGSYISGTNGAS | 15 |
| 287 | 294 | DQGGNKRP | 8 |
| 316 | 324 | KNTGNEEHR | 9 |
| 356 | 381 | CPGLDNVWGDEFERLYTLYEREKRYK | 26 |
| 414 | 421 | KSNQQNLG | 8 |
| 433 | 439 | IQYADAN | 7 |
| 493 | 499 | SNKRHRP | 7 |
| 547 | 582 | EKEGPYDTYVGSYASNGILQYDLWNVVPSDLWNWEP | 36 |
| 626 | 636 | RRVLSGEFQVV | 11 |
| 645 | 653 | TERKLWNDE | 9 |
| 659 | 673 | MVDGGSIQNTNLPED | 15 |
| 739 | 767 | TKPASAPIQFTLDKDKIKPLVVCDSEICT | 29 |
| GP060 | 9 | 24 | ASKSLKPTKKLSPSDE | 16 |
| 45 | 56 | DGLFTKPINTPE | 12 |
| 103 | 106 | PFGWLTGIDDDPETHVVIK | 4 |
| 129 | 144 | EYLKPYNVNNLSVLTT | 16 |
| 146 | 157 | KELSINTFNVPD | 12 |
| 226 | 239 | IRIFNSTSVKKFPT | 14 |
| 253 | 271 | DESSFPTPKTFTPLNASPY | 19 |
| 348 | 378 | FPVPTIKSVTNKKKICKKHCFVNSQYTTRTL | 31 |
| GP061 | 37 | 44 | SKFLTNCN | 8 |
| 48 | 57 | VEKYDKSTTA | 10 |
| 75 | 109 | RHLSRPNSSDELDQKKELTDELKTRYHSIYDVFEL | 35 |
| 121 | 172 | PRLREKVSKAIDFSQMDLKIDDLSRKGIHTGENPKVVKMKIEPERGAWMSNR | 52 |
| 184 | 212 | GSEVDYIGQFDMRFLNSLAIHEKFDAFMN | 29 |
| 260 | 270 | GGNIPTEFHHY | 11 |
| 283 | 295 | NTNHRHSVLDNTN | 13 |
| 374 | 402 | NLQDLSLDITETDNAGLKEYKRMEKWTKK | 29 |
| GP062 | 15 | 37 | VNVFSYKYSQDEFSNMSNMERDS | 23 |
| 48 | 169 | HRWHNAHVVKHKGIYKVSTEAHGKKVSPPSLGKPSHINLTAKQYIYSEHTISFECYSFLKCITNAEINSFDEYILRGLLEAGNSLQIFSNSVGKRTDTIGVLGNKYPFSKIPLASLTPKAQR | 122 |
| 205 | 219 | LFGGFSTLDKITDFH | 15 |
| 260 | 267 | SIPEELIN | 8 |
| 333 | 339 | RERLKVF | 7 |
| 350 | 382 | GDTLFKISEVFIHNKINPSSRMAYIEEEKRNLV | 33 |
| 386 | 392 | QMYTPPD | 7 |
| 427 | 441 | KVLEIDKILEKVYSS | 15 |
| 472 | 482 | FVPAPFGGSQQ | 11 |
| 489 | 501 | RDQRKGRVGRVNP | 13 |
| 511 | 521 | SYMKSIQRINS | 11 |
| 536 | 554 | LTLPEDLFIIPTNLDILWR | 19 |
| 620 | 636 | RIKILNFKHKDNDTYIH | 17 |
| 641 | 650 | LFGVYNGTNA | 10 |
| GP063 | 93 | 103 | GKLKDNFSLSS | 11 |
| 109 | 116 | KELENEYY | 8 |
| 136 | 146 | LYNGGRIDMID | 11 |
| 183 | 194 | NQTFGSLPACPE | 12 |
| 196 | 204 | IPSSIPVST | 9 |
| 262 | 268 | EYESFLR | 7 |
| 275 | 284 | ISQCQRINMN | 10 |
| 343 | 353 | SKAMCNTRDTQ | 11 |
| 365 | 383 | DGLIKKPYRSIPLMKRLTS | 19 |
| 406 | 418 | QDISLKRNAEGIR | 13 |
| 422 | 431 | SFSADDIQAI | 10 |
| 436 | 443 | SFLKYSRS | 8 |
| 462 | 468 | SIDDILT | 7 |
| 508 | 514 | KLLDKTS | 7 |
| 575 | 587 | GDVENFSSLKKDV | 13 |
| GP064 | 36 | 53 | DRENAIIIQRNDEIPTRT | 18 |
| GP065 | 35 | 51 | ISYDDLITYFPDRKYHK | 17 |
| 60 | 70 | VDLSEELSMEF | 11 |
| 91 | 98 | RPCYKLGD | 8 |
| 129 | 142 | TPQIYTYSNEHVPI | 14 |
| 184 | 190 | VDPINYQ | 7 |
| GP066 | 43 | 55 | KDGDSSMLGDVKR | 13 |
| 96 | 105 | KTDKSLVNLE | 10 |
| 113 | 120 | KANYGVWP | 8 |
| GP067 | 8 | 25 | SLLLENKSLTILDDNLYK | 18 |
| 49 | 54 | EELTTV | 6 |
| 60 | 66 | NGWVKKG | 7 |
| 77 | 126 | SIKIKQNVRDKRRKYSKSTKDRKMLELEKCTSKIQNVTGFMEEEIKAEIQ | 50 |
| 220 | 227 | KFVPSAED | 8 |
| 256 | 267 | LNKIQLFSDFTI | 12 |
| 278 | 290 | NYYRKTNSTVDVR | 13 |
| 300 | 312 | ANLDDVYSYIPPC | 13 |
| 329 | 337 | NDFKSSYLE | 9 |
| 351 | 362 | PRKEIDVSEVKT | 12 |
| 365 | 377 | SYIDFENTKSDID | 13 |
| 424 | 430 | TKSDNII | 7 |
| GP068 | 8 | 30 | STCGKDISHERYKLIIRKKSLKD | 23 |
| 39 | 59 | CCRLKLSTQIEPQRNLTVQPL | 21 |
| GP069 | 96 | 105 | LGIPYGFGHN | 10 |
| 119 | 144 | NAGINTSSKRILGKDIFLSQNFTDDN | 26 |
| 150 | 161 | YDSNNLTFWQID | 12 |
| GP070 | 25 | 36 | DISINSEYIESK | 12 |
| 38 | 48 | KQLCYCPASKK | 11 |
| 62 | 73 | NIEIMDKEQLLK | 12 |
| 150 | 158 | KSMSQELAE | 9 |
| 182 | 210 | PIIVAGFSGKEPISNYSAEVERLMELPVK | 29 |
| 221 | 236 | LARKGIDTSNNIAEYI | 16 |
| 238 | 283 | GLKIEEIEKVEKYLPEVISTIANSNIIKNKKSIFPANINDKQIMEC | 46 |
| 288 | 323 | DTSEKYSKGYKTDGAVTSPLTGNNTITTFIPISASD | 36 |
| 345 | 352 | KKNEGKNN | 8 |
| GP071 | 5 | 12 | IKIDKLRQ | 8 |
| 113 | 119 | ELMPIRT | 7 |
| 129 | 145 | QKKSYVFNFHKYEEKCC | 17 |
| 180 | 203 | KTPGNTDAFSREYSMTECSQELQK | 24 |
| 213 | 221 | LNKLRGFKK | 9 |
| GP072 | 5 | 28 | VSVELPKRDPPPGVPTDEMLLNVD | 24 |
| 39 | 125 | LLEYVHIGPLAKDKEDKVKKRYPEFRLVNTGPGGLSALLRQSYNGTAPNCCHTFNRTHYWKKDGKISDKYEEGAVLESCWPDVHDTG | 87 |
| 136 | 144 | QGDTFDRNI | 9 |
| 156 | 164 | SDRTVEGQQ | 9 |
| 228 | 252 | RDKLEESLKYAEPRECWDPECSNAN | 25 |
| 258 | 267 | TRNYNNLGLC | 10 |
| 294 | 318 | SNSDRFSTVPVNRAKVVQHNIKHSF | 25 |
| GP073 | 23 | 32 | EQEANASAQT | 10 |
| 41 | 48 | FYIRQNHG | 8 |
| 79 | 86 | LTPEQKAY | 8 |
| 93 | 117 | AALNIQTSVNTVVRDFENYVKQTCN | 25 |
| 171 | 182 | TTQIAPRQVAGT | 12 |
| GP074 | 5 | 20 | ADRLDDIVKQNIADEK | 16 |
| GP075 | 4 | 66 | RTDVTNDNIDKNPTKRGNKNIPGRNERFNDRNRFNNDGNNRPRLQPSPPPRQDNKCREENGDF | 63 |
| 76 | 82 | KEYCNDG | 7 |
| 139 | 151 | NSKVVRLTPQVKC | 13 |
| 213 | 221 | NRLYRTNLP | 9 |
| 236 | 242 | ACRGYEH | 7 |
| 266 | 281 | LKVKKKYATGAPVNRL | 16 |
| GP076 | 49 | 59 | PRTMSKYELEL | 11 |
| 79 | 92 | NLGLGDDKLTIEAI | 14 |
| 112 | 128 | DMTAVIPKKSGRRKNKN | 17 |
| 147 | 170 | KKINIYKENMESASTEYTPIGDNK | 24 |
| 200 | 230 | TNKNKLEKLSTNKELELYSSSPLQEPIRLND | 31 |
| 239 | 247 | KKNIPLTDI | 9 |
| GP077 | 17 | 26 | TFKHSLLSVY | 10 |
| 56 | 70 | MHKRKIPDPIDRLRR | 15 |
| 85 | 105 | LPWITTQTSALSINSKPIVYK | 21 |
| 112 | 124 | RSINGSQPVSLND | 13 |
| GP078 | 23 | 31 | ASQDDESSL | 9 |
| 54 | 93 | KLEAVGHCYESLSEEYRQLTKFTDSQDFKKLFNKVPIVTD | 40 |
| 114 | 125 | KKESALATTAID | 12 |
| 128 | 136 | RYIDPRRDI | 9 |
| 147 | 156 | SNKAKNNYSL | 10 |
| GP079 | 42 | 58 | NDNRYGTGLWTHDKNNF | 17 |
| 112 | 120 | TFQRKPFNN | 9 |
| 154 | 165 | ETKIEIIGGIDM | 12 |
| GP080 | 15 | 37 | EIDNELDYEPESANEVAKKLPYQ | 23 |
| 99 | 111 | HDPILNGLRDVTL | 13 |
| 141 | 154 | SKRGGNEPSTEDLL | 14 |
| 178 | 204 | CPFPDQWIKDFYIPHGNKMSQPFAPSY | 27 |
| 227 | 234 | SDAVNYEK | 8 |
| 272 | 279 | CNKTFPTT | 8 |
| 295 | 330 | NIPTTSTEKVSHEPIQCKVSSKDSVYKNRNSKRSVR | 36 |
| GP081 | 65 | 78 | NESSINYTPVDDDYGEPIIIT | 14 |
| 89 | 95 | QKGHNKF | 7 |
| 109 | 122 | LFPSFVRLNTTETN | 14 |
| 130 | 145 | TGDGKKTLRLPKMLET | 16 |
| 164 | 175 | FFRNNMITGVEI | 12 |
| GP082 | 26 | 35 | KSIVRIGIDT | 10 |
| 83 | 116 | LDVNNVCDSKRVATENIAVRYLNQEIRYPIIDIK | 34 |
| GP083 | 22 | 59 | IIISHVKNDDDIGTVKDGRLGAMDGALCKTCGKTELEC | 38 |
| 92 | 118 | HCGLLRSREPYSNDINLKELSGHALRR | 27 |
| 122 | 164 | KILSKKKSCWNSECMQPYQKISFSKKKVCFVNKLDDINVPNSL | 43 |
| 173 | 186 | HEKFWPLLEIYQYP | 14 |
| 201 | 220 | IIRPAISFWIDSIPKETNEL | 20 |
| 250 | 265 | IKIISNNTTSINLSYI | 16 |
| 277 | 285 | IVARRKDQT | 9 |
| 312 | 324 | TEKIFVNAFTVNK | 13 |
| 333 | 363 | QVKFYFNKRLNQLTRIRQGKFIKNKIHLLPG | 31 |
| 411 | 418 | SQNADFDG | 8 |
| 471 | 478 | IQDLCLDE | 8 |
| 486 | 494 | YGREFDPKG | 9 |
| 506 | 514 | YLIGEKINY | 9 |
| 522 | 538 | EIIANDVDSNFVVAMRH | 17 |
| 610 | 628 | LKDVRDGKIVPLSKALEAD | 19 |
| 650 | 656 | RQTLIDN | 7 |
| 688 | 724 | IDGEPAETRVLGRVLPYYLPDSKDPEGRGYILNSLTK | 37 |
| 742 | 754 | STDIVCETSRTGT | 13 |
| 787 | 845 | YTKILGSVCKPVDLIYPDESMTWYLEISALWNKIKQGFVYSQKQKLAKKTLAPFNFLVF | 59 |
| 847 | 863 | KPTTEDNAIKVKDLYDM | 17 |
| 865 | 903 | HNVIDDVREKYFFTVSNIDFMEYIFLTHLNPSRIRITKE | 39 |
| 936 | 975 | EKFTQQALSSFHTTEKSGAVKQKLGFNEFNNLTNLSKNKT | 40 |
| 985 | 996 | ISKLQSVKINFE | 12 |
| 1025 | 1066 | LYIKRAEITELVVEYMIERFISFSVIVKEWGMETFIEDEDNI | 42 |
| 1070 | 1100 | VYLNFVEPEELNLSKFMMVLPGAANKGKISK | 31 |
| 1109 | 1149 | TGYDDFNQTKKLNKMTVELMNLKELGSFDLENVNVYPGVWN | 41 |
| 1197 | 1206 | SVNKFKFGAA | 10 |
| 1227 | 1235 | KKSEPINDN | 9 |
| 1258 | 1283 | LGLLMRMERKLSDKISSQKIKEMEET | 26 |
| GP084 | 4 | 28 | KSLYKYLLLRSTGDMRRAKSPTIMT | 25 |
| 40 | 49 | KNAMNAPSSE | 10 |
| 60 | 68 | MDKYTLPNS | 9 |
| 129 | 138 | NKESSPMLYF | 10 |
| GP085 | 14 | 25 | EYVREKAIVGVQ | 12 |
| 64 | 97 | RIKNTVNDWKSLTDSKTKLESDRGRLLAAGKDDI | 34 |
| 123 | 144 | AIRRGTGDAWMVKKAAKVDPSA | 22 |
| 179 | 185 | PHWCSDL | 7 |
| GP086 | 18 | 61 | PPSETFPNLHEHINDQKFDDVKDNEVMPEKRNVVIVKDDPDHYK | 44 |
| 69 | 79 | TGGNIRNDDKY | 11 |
| 105 | 117 | LWDSKFFTELENK | 13 |
| 157 | 172 | IITGNKVKTELVMDKN | 16 |
| 249 | 256 | RFENMKPN | 8 |
| GP087 | 19 | 34 | LLDANISPKSYDDFIS | 16 |
| 86 | 106 | QTVKEEISTSLSLNDKNTTDE | 21 |
| 137 | 166 | RGDVIVSYKNSDLVSSFNAELEPEIKKIPF | 30 |
| 179 | 187 | LDQLRFSKK | 9 |
| 240 | 256 | TGKIYKNSFSEDHNNSL | 17 |
| 295 | 321 | EPVFIKRKKLDIIEIDEPEAWKRDVKV | 27 |
| 324 | 331 | APCEHQIR | 8 |
| 370 | 379 | IPIFNLDAAD | 10 |
| 445 | 456 | SRRQEYEKKFSS | 12 |
| 477 | 483 | SSTELFY | 7 |
| 513 | 521 | SKNKTVEES | 9 |
| 539 | 546 | RICEKGSL | 8 |
| 579 | 652 | VSIQRSALEPNYDVESRGEELPLSTLKFFDTSTIIVKTMAPVHTYVEQKIVAPTPSVEPTDASLKQFKELTCDE | 74 |
| 663 | 669 | TNATKLV | 7 |
| 713 | 731 | DPMPFEEELIDHEHAQYKI | 19 |
| 754 | 758 | SLNRE | 5 |
| 775 | 785 | KQWIDENITRI | 11 |
| GP088 | 5 | 16 | ITNKADTSSFTK | 12 |
| 25 | 152 | RNSAENKDKNDDIFPEDVIIPSTKPKTKRATTPRKPAATKRSTKKDKEKEEVEEEEVVIEEYHQTTEENSPPPSSSPGVGNIVESVTAVELDDSNGDDDNDNDNDDNEPMVQVEAGKVNHSARSDLSD | 128 |
| 206 | 217 | EGKSKVVRKKVK | 12 |
| GP089 | 6 | 38 | YKDGKLFTDNNFLNPVSDNNPAYEVLQHVKIPT | 33 |
| 64 | 84 | SKGRRQYFYGKMHVQNRNAKR | 21 |
| 133 | 139 | KMKYLKE | 7 |
| 193 | 218 | SSPEEFLFNKLSERKVYECIKQFGIR | 26 |
| 238 | 250 | NVKSISPLPSPKK | 13 |
| 263 | 271 | VGHTPSISK | 9 |
| 284 | 299 | KDKNFLDVVSKTTFDE | 16 |
| GP090 | 58 | 75 | YKASQYLDLPLTPISGDE | 18 |
| 113 | 128 | KYRNRSDTRISQDTEK | 16 |
| 130 | 142 | KIALAKGIDYEYI | 13 |
| GP091 | 24 | 35 | ELEQGSTAYEIN | 12 |
| 72 | 90 | EGVKIRTKIPLSKVHGLDV | 19 |
| 97 | 116 | DAIDNIVWEKKSLVTENRLH | 20 |
| 125 | 139 | TEERHIFLDYKKYGS | 15 |
| 166 | 173 | LGSGAQSK | 8 |
| 182 | 188 | HPKSRPN | 7 |
| 199 | 207 | DNETVPYDE | 9 |
| 229 | 253 | LSPPINAPIKTFMLPKQDIVGMDLE | 25 |
| 288 | 295 | YPVKRIID | 8 |
| 322 | 344 | NAISDRLEESKYVESKLVDICDR | 23 |
| 346 | 361 | VFKSKKYEGPFTTTSE | 16 |
| 385 | 399 | PKSNIDFKIKKENTI | 15 |
| 408 | 420 | RYMSSEPIIFGES | 13 |
| 427 | 440 | KKFTNDKGFPKEYG | 14 |
| 459 | 471 | LEYINTHNEVGIK | 13 |
| 486 | 511 | NGEILKPRIDKTMKYINSEDYYGNQH | 26 |
| 519 | 534 | RDQSIKIGDVFNEDKL | 16 |
| 540 | 564 | QYANNDKFRLNPEVSYFTNKRTRGP | 25 |
| 604 | 610 | DLEKYFY | 7 |
| 631 | 645 | ERYNKLNSGIKTKYY | 15 |
| 664 | 670 | REVFYFG | 7 |
| 721 | 759 | TDKKTFIIHKNLPSSENYMSVEKIADDRIVVYNPSTMST | 39 |
| 796 | 829 | KKFINGASTMEDRPSTRNFFELNRGAIKCEGLDV | 34 |
| GP092 | 14 | 27 | LNSSILFPDDVQEL | 14 |
| 38 | 44 | KSNGTPT | 7 |
| 50 | 58 | KTMARFDNK | 9 |
| 83 | 107 | VEPLLPDKSINISINNTEYPQLEGP | 25 |
| 122 | 129 | KTGISEPI | 8 |
| GP093 | 8 | 17 | DNKYPKVDND | 10 |
| 64 | 70 | GSSFQHG | 7 |
| 79 | 105 | FIDDGRQVRWCSTSNHISEDIPEDIHT | 27 |
| 132 | 141 | SLGDDSYLTN | 10 |
| 219 | 231 | GVLENEKVLDTYK | 13 |
| GP094 | 5 | 31 | TVSHAPYTITYHDDWEPVMNQLVEFYN | 27 |
| 38 | 47 | LRDETSPIPD | 10 |
| 101 | 111 | GVIDYKGYNLN | 11 |
| 129 | 135 | ETKSHAI | 7 |
| 162 | 172 | DFSNIRAKLES | 11 |
| 184 | 193 | ARDRQFEKDR | 10 |
| 207 | 214 | KAPINWAQ | 8 |
| GP095 | 19 | 29 | VPSVCRQNEDP | 11 |
| 37 | 51 | CDELERYIKNNPECT | 15 |
| 53 | 60 | FESLRDEE | 8 |
| 75 | 81 | ACLDEID | 7 |
| 102 | 111 | FTECGAIHEN | 10 |
| 121 | 128 | SLTKSTNR | 8 |
| 159 | 168 | RSSENPLTRS | 10 |
| 189 | 203 | PNCDTIHVMQPPHDN | 15 |
| 224 | 242 | QRRLEDLVPDKLWEPGFIS | 19 |
| 255 | 270 | INSIINFNDLDENNFT | 16 |
| 285 | 294 | CKKRSHKHPH | 10 |
| 303 | 324 | IRIYKTGNPHSCKVKIVPLDGN | 22 |
| 355 | 362 | WKFNSEEP | 8 |
| 377 | 409 | KEYSSELLCPRKRKTVEANIRDMLVDSVETDTY | 33 |
| 426 | 434 | MFYSGDDAK | 9 |
| 444 | 460 | FKFDDTKFVEDSPEMEE | 17 |
| 470 | 478 | PLTDENKKN | 9 |
| 522 | 542 | DLFVETGQTILTDVLDKGPNP | 21 |
| 558 | 575 | LPDFACSGTKKIRSDNIK | 18 |
| 629 | 646 | HFSQPSGREAAENNDAYD | 18 |
| 679 | 691 | YHVPIMKLYPTPE | 13 |
| 701 | 723 | KIGTLLVSSSVKHIPLMTDLSKK | 23 |
| 729 | 769 | DNVVTLPLTTFQQKISKYFNSRLFGHDIESFINRHKKFANV | 41 |
| GP096 | 7 | 21 | DLFDNHVDSIPTILP | 15 |
| 90 | 106 | NLFNDEFIAENIFIHST | 17 |
| 140 | 147 | IFGNNTGE | 8 |
| 187 | 210 | IDFGEIISRGKKVIQTLLNERGVN | 24 |
| 221 | 243 | SYYEMPDKDLPTIRYHGRKFLDT | 23 |
| 266 | 276 | CYHEMFDKNMY | 11 |
| 295 | 327 | LFQEQDKELYPNLKINNGVLYGEELVTLNISSK | 33 |
| 363 | 382 | NGYSEYNGSQGTNPHMINGK | 20 |
| 392 | 398 | KMKSSLE | 7 |
| 404 | 411 | YNSPENDD | 8 |
| 479 | 518 | DFNDEVTSLNDYTQDELINVLPFDIKKLLYLKFKTKETNR | 40 |
| 527 | 539 | SETYSLPPHPSIV | 13 |
| 545 | 587 | ELVRQFFYNNSRIKYNDAKLLKMVTSVIKNKEDARNYIDDIVN | 43 |
| 590 | 600 | FFVSNKVFDKS | 11 |
| 627 | 633 | FRKEYNV | 7 |
| GP097 | 16 | 22 | PHELTLD | 7 |
| 36 | 60 | LHKEISGKMAKKIEICKDVELPLGE | 25 |
| 110 | 119 | RDSGTVSFSD | 10 |
| 129 | 136 | NAYDNGSE | 8 |
| GP098 | 28 | 34 | YNESKPT | 7 |
| 73 | 86 | EDDYGSNHLIDVYK | 14 |
| 98 | 110 | KKKYSSYEEAKKH | 13 |
| 135 | 150 | VNQLDSIRTANTSAPF | 16 |
| 170 | 178 | LGTTINHSA | 9 |
| 202 | 228 | LLSLSNHEGKPHYITENYRNPYKLNDD | 27 |
| 234 | 273 | SGEIIRAATTSPARENYFMRWLSDLRETCFSYYQKYIEGN | 40 |
| GP099 | 21 | 28 | KRIKDIPR | 8 |
| 61 | 70 | SQQNSDSIFR | 10 |
| 79 | 103 | MYYNELREIFRRLRKGSINNIDPHF | 25 |
| 128 | 138 | KEESDERITVK | 11 |
| 172 | 186 | EDLSHTSIYNVEIRK | 15 |
| 192 | 198 | DCINDDK | 7 |
| GP100 | 39 | 45 | NQCLWCH | 7 |
| 75 | 87 | IIRTRNMSRKKRL | 13 |
| 100 | 118 | RSILSSFFSLDPATIDNDR | 19 |
| 127 | 134 | ILKRGENV | 8 |
| 143 | 155 | KEEVNIDNSFVFI | 13 |
| 190 | 200 | IIDTFKSNHEI | 11 |
| 205 | 213 | FLDPNSGNG | 9 |
| 233 | 244 | HRGCYYESLKKL | 12 |
| GP101 | 10 | 32 | DYALRRTTNMPVEMMGTDVVRLK | 23 |
| 115 | 132 | DDQNFRNKFFTNIKTINS | 18 |
| 206 | 225 | LQHQSLFENKRLVNEKELVS | 20 |
| 236 | 253 | NNEFSIFDDVEGSASFAK | 18 |
| 279 | 366 | IKTGISSFRILRRMATTFTFDSFPERQNRDPGEYAQEIATLYNDFKRSLRDREFSKSALDTFKKGELLGGDASAADISLFTELKEKSA | 88 |
| 413 | 421 | SRTKDTRIK | 9 |
| 427 | 433 | NQESNTN | 7 |
| 482 | 490 | SHVLTPPER | 9 |
| 504 | 510 | NGMPTVD | 7 |
| 514 | 616 | FEIIQSKSKEFVQLFRVFKHTSLEWIHANEKDFSPIDNESGWKTLVSRAIDLSSKKNITNKLIEGTNIWYSNSNRLMSINRGFKGVDGRVYDVDGNYLHDMPD | 103 |
| GP102 | 5 | 39 | VKNIREGTHVLLPFYETLPELNLSLGKSPLPSLEY | 35 |
| 50 | 59 | VNDLNRMPTD | 10 |
| 62 | 96 | KLFTHDIMLPESDLDKVYEILKINSVKYYGRSTKA | 35 |
| 104 | 125 | SARNKLFKRERDAIKSNNHLTE | 22 |
| 183 | 191 | KCVSDSWLK | 9 |
| 215 | 233 | SVTKSSSWKDVNSVQFSIL | 19 |
| 268 | 283 | TSDSKSIENKHQRRLV | 16 |
| GP103 | 78 | 85 | VKGMGRFG | 8 |
| 110 | 150 | IEGEELYNNCINNTIALKHSGYSSELNDISIGLTPNDTIKE | 41 |
| 196 | 208 | SFDFETFNKEFVY | 13 |
| 221 | 247 | NVQIKPSFIEKPRRVIGQINQPTATVT | 27 |
| 273 | 283 | YPGYSQDEKDY | 11 |
| 301 | 307 | GPPTGYP | 7 |
| 355 | 361 | NSFIYNI | 7 |
| 402 | 419 | SQRNVYNGDNRSAESKAK | 18 |
| 433 | 440 | FKNKTDII | 8 |
| 464 | 473 | NELLTKSNNG | 10 |
| 492 | 500 | ITANVSRGK | 9 |
| 512 | 521 | MDVNHPIYYV | 10 |
| 535 | 541 | VSYDQGV | 7 |
| GP104 | 5 | 27 | VSLPDVVISAPKAVFKPAKEEAL | 23 |
| 42 | 50 | SIKTNSVID | 9 |
| 94 | 101 | VALREEPK | 8 |
| 112 | 118 | DKEKVIN | 7 |
| 123 | 130 | LRDKDGVY | 8 |
| 135 | 144 | FKENSQIIDI | 10 |
| GP105 | 8 | 20 | GCRHNGIVSEQGY | 13 |
| 28 | 49 | SVFQKCTKVQKKSNFHVSNKLI | 22 |
| 72 | 85 | LDIMEKNQISTDDV | 14 |
| 96 | 104 | ANERINKKD | 9 |
| 115 | 129 | VKDEKLNLSTEKINE | 15 |
| 163 | 186 | TSVTKNLKPQTVKNYTKNNSNQLV | 24 |
| 196 | 220 | SKKRVTMVEDYGHEYVFVDERFSTC | 25 |
| GP106 | 5 | 19 | EKYNIVLNPPKRCFS | 15 |
| 42 | 48 | SQPQKLK | 7 |
| 58 | 70 | RNKMFLYKILDDE | 13 |
| GP107 | 14 | 40 | NTGLKSSYTNQTLSLVDEDHIHTSDKS | 27 |
| 62 | 101 | ARNQRTKPKRAGNDQAQQTTKKDCMVSIDEVASTHDWSTR | 40 |
| 117 | 123 | KYDTSNF | 7 |
| 136 | 145 | NIVRTNRNEL | 10 |
| 185 | 196 | KELDKIYSPSNH | 12 |
| 210 | 229 | FTDMSSSQDLSFIYRKPETN | 20 |
| 264 | 271 | YEFRRVKS | 8 |
| 341 | 348 | CSQVMTDE | 8 |
| 371 | 379 | PINGISYDM | 9 |
| 393 | 401 | KMITTSDSP | 9 |
| 429 | 450 | GYGRCSGVTHIDSLGTNVMGSA | 22 |
| 469 | 493 | QNKNMFGGECYTGFRSLIDDTPIDV | 25 |
| 515 | 523 | GDQFFDCGS | 9 |
| 547 | 557 | LSVFNPGARNA | 11 |
| 567 | 577 | YKKLSMDSDDG | 11 |
| 579 | 611 | YEWLNGDGSVFAASKQQMLMNHVANFDDDLLTM | 33 |
| 632 | 640 | DQYISARHI | 9 |
| GP108 | 5 | 74 | NKFSQGLAESSTPKSSIYYSEEKDLDIKKDEAIEIGLKSQESYYQRQLREQLARDNMMAASRQPIQPLQP | 70 |
| 77 | 105 | HITPLQVPTPAPTPKPRQQQTNTSSDMSN | 29 |
| 109 | 129 | WLSADDNTQPSSLLPALTPIN | 21 |
| 139 | 180 | NKDQKTTTTPSTQPSQTLPTTTCTQQSDGSISCTTPTVTPPQ | 42 |
| 199 | 220 | TTAQQNPNPGATSQQNLDNMAL | 22 |
| 228 | 251 | EKDMRQLQAETNDLVTNVYDAREY | 24 |
| GP109 | 5 | 62 | DDIIDYESDDLTEYEDDDEEEEDGESLETSDIDPKSSYKIVESASTHIEDAHSNLKHI | 58 |
| 92 | 111 | LLQRGRLPLVSEFSNETMKQ | 20 |
| 136 | 145 | LLSVNDFDKD | 10 |
| GP110 | 17 | 35 | DNLERETGLSASDVDMDFD | 19 |
| 48 | 60 | KKVCVITPTIEDD | 13 |
| 84 | 99 | VVKSVYNKLDDAEKEK | 16 |
| 125 | 137 | RQDTEDIVSDSKK | 13 |
| 146 | 160 | RASTTENAAYQVLQQ | 15 |
| 189 | 209 | KLISEKETLNEYKQLYTISSE | 21 |
| 225 | 232 | SVQLSNNK | 8 |
| 290 | 309 | KTKISVEKFKQTGINNVQSL | 20 |
| 314 | 333 | SDNKKEYKTIISEEYLSKED | 20 |
| 348 | 358 | IKYDNNLLNMR | 11 |
| GP111 | 45 | 52 | LNIQQPEI | 8 |
| 89 | 111 | LEYSYVDNTIFNPFVYTQKKTLL | 23 |
| 137 | 148 | DTSIPEFGSYED | 12 |
| 158 | 176 | TMLMDVFPQLDLDITVESK | 19 |
| 187 | 204 | LTGLKKIIQRVQDLDINY | 18 |
| 262 | 273 | VSDIDTQMERIK | 12 |
| 355 | 363 | QKSADFTKV | 9 |
| 373 | 381 | QNTKNKNRK | 9 |
| 389 | 404 | DPGMKKISNNFYRSDE | 16 |
| 449 | 455 | DQSHRST | 7 |
| 460 | 468 | VHQIDVEKK | 9 |
| 481 | 488 | VTESKMSF | 8 |
| 510 | 516 | KRLKETS | 7 |
| 583 | 617 | KKKESSDKIDFFPPNYKLLKDLFPKQTIQTPIQSD | 35 |
| 634 | 640 | FNEDLSS | 7 |
| 695 | 707 | PTLEKYYPNFGRV | 13 |
| GP112 | 5 | 11 | VPDLNLE | 7 |
| 21 | 38 | IDQTTPMIKENIGFISRS | 18 |
| 45 | 54 | RSKDDERKLA | 10 |
| 63 | 72 | YFLDHREIHY | 10 |
| 78 | 86 | DAVKDVTIT | 9 |
| 121 | 133 | LYNEHSKKFKFNS | 13 |
| 139 | 153 | QEKLGYQSGNYHVYD | 15 |
| 168 | 181 | EHSSGIFNIRQESY | 14 |
| 245 | 251 | ESELPIK | 7 |
| 268 | 283 | KKTSSFKISKRDKDTL | 16 |
| GP113 | 70 | 92 | EQDDKKNTNNASNSNKLNESSIN | 23 |
| GP114 | 10 | 17 | LDQLEDSE | 8 |
| 52 | 66 | LNNSLGSVTKQDELQ | 15 |
| 81 | 87 | TSRELKL | 7 |
| 98 | 121 | DIINTPINISSETNPIINTHSFYD | 24 |
| 151 | 170 | DGSDSMDVLAEKKYPDLNFD | 20 |
| 181 | 189 | DVINAPIKE | 9 |
| 215 | 227 | TAQDQPRFDNTYA | 13 |
| 236 | 253 | GVNLNTLPLPNVDLTTMP | 18 |
| 321 | 336 | RDPQNAAVNVTVGLPN | 16 |
| 359 | 371 | EQRSTAIKVTKSM | 13 |
| 376 | 385 | MDYEEYKSKN | 10 |
| 450 | 470 | SSMTIREFPKKDKSSIMHIGL | 21 |
| 508 | 518 | DKGSPYYIRKE | 11 |
| 570 | 576 | CSKNEAE | 7 |
| 595 | 604 | FRDYQSYRQY | 10 |
| 655 | 662 | IFSPENKA | 8 |
| 712 | 722 | TTQSDCNMTNE | 11 |
| 833 | 845 | GCRIDDAQITTDD | 13 |
| 878 | 889 | NLNMTDGDSVSF | 12 |
| GP115 | 7 | 33 | TDIQNDLITEFSEDNYPSNKNYEITLR | 27 |
| 44 | 178 | VVDREHNAAVVSSPEEISSQLNEDLFPDDDSPATIIERVQQPHTTIIDDTPPPTFRRELLISEQRQQREKRFNITVSKNAEAIMESRSMITSMPTQTPSLGVVYDKDKRIQMLEDEVVNLRNQQSNTKSSNNLDN | 135 |
| 185 | 195 | GKTPYKSTEVN | 11 |
| 206 | 240 | LNGSPLSVEDLDVCSEDEIDRIYKTIKQYHESRKR | 35 |
| 264 | 276 | FDEIKGLSTDITS | 13 |
| 289 | 297 | AVASKLGIG | 9 |
| GP116 | 4 | 16 | KKNLAVRSSYDDY | 13 |
| 35 | 107 | GGDAAVKGGNNNLNSQTDVTAGACDTKSKSSKCITCKSKSSSSSTSTSKSSKNTSGAPRRRTTATTSFNAMDG | 73 |
| 136 | 185 | GEINHDLLGIESVNAGKKKPSKKMPTNKKINMSSGMRRQEQINPNDCCLD | 50 |
| GP117 | 26 | 59 | IKNSQNPSPNVNLPPPETRNTRFVNNLEKDHISS | 34 |
| GP118 | 35 | 41 | KSTSPTR | 7 |
| 69 | 86 | KHCAPHRVSGVIHTNHSD | 18 |
| GP119 | 15 | 24 | PSTLSDSSGR | 10 |
| 26 | 44 | IVMPDNRSFTFKEGFKLDE | 19 |
| 66 | 72 | KHRIKWM | 7 |
| 82 | 90 | ENIPPPFRL | 9 |
| GP120 | 13 | 21 | ASGIADIRD | 9 |
| 42 | 55 | ESYMYYYETSPGEI | 14 |
| 87 | 94 | GEPCSSFK | 8 |
| 105 | 123 | NEVTPEYIKDLKHATDYIA | 19 |
| 132 | 168 | KKDYLLGDSDSVAKCCSKTNTKHCPKIFNNNYKTEHC | 37 |
| 177 | 184 | RNDPGNPN | 8 |
| 221 | 228 | RPDYFTFG | 8 |
| 251 | 259 | PKSNSGDKY | 9 |
| 270 | 290 | CTDESRDRKWLYYNQDVQRTR | 21 |
| 317 | 339 | TRTTSTVGDIHPGEPVVKDKIKL | 23 |
| 365 | 373 | PKIKTNDIN | 9 |
| GP121 | 6 | 58 | YYNMLDDFSAGAGVLDKDLFTEEQQQSFMPKDGGMMQNDYGGMNDYLGIFKNN | 53 |
| 161 | 200 | RQDYRRSINVTIPEQYTCNKPYTAGNKVDVDIPTFNSLNT | 40 |
| GP122 | 27 | 45 | NEDGDFVEVEPGSLFKFLI | 19 |
| 54 | 85 | SVKTSLVFETLTTTDNKITSINPTNAPKLYPL | 32 |
| 97 | 106 | MRKMIKLKRP | 10 |
| 153 | 174 | AVGLEHKISIDGVSSLLKELKT | 22 |
| 191 | 198 | AFCKYINK | 8 |
| 240 | 248 | PSNRIYCNS | 9 |
| 256 | 264 | SDLKKTIYA | 9 |
| 271 | 305 | PYSTDNIRHMIKRLDGPSNKYHIYTEKLLSVDEPR | 35 |
| 356 | 363 | AQNRRTPD | 8 |
| 433 | 444 | VKEIKYMIGNFV | 12 |
| 451 | 483 | SVDKLGFKQESYRKHQESDPTSVCTASSREERV | 33 |
| GP123 | 5 | 26 | NARSGMKSRKKKPKTTVIDEDD | 22 |
| 35 | 59 | SKLVKISDITKVSLDYINTMRGNTL | 25 |
| GP124 | 34 | 42 | VNYKRLNKN | 9 |
| 67 | 87 | DNKNVPIPCSEINEVNNNKDV | 21 |
| 94 | 101 | KDRDDIPG | 8 |
| GP125 | 21 | 34 | RFSDSAAIEKYNSL | 14 |
| 51 | 71 | ANVETSISDYYDEVKNKPFNI | 21 |
| 98 | 109 | LGSGNSFQIPDD | 12 |
| 143 | 150 | SKYQSPVN | 8 |
| 156 | 163 | SEYGLNIP | 8 |
| 171 | 179 | EEDTLFDDE | 9 |
| 277 | 287 | DYDGNGTETRG | 11 |
| 317 | 343 | KQLTNKLNINECTTVDELVDEINKSGT | 27 |
| 345 | 351 | KRKIKTQ | 7 |
| 389 | 399 | IENTNCLNNPS | 11 |
| GP126 | 5 | 22 | TSSSQSLISSPMSKKDYS | 18 |
| 56 | 65 | LDWSSDWERR | 10 |
| 112 | 126 | SPVMSGNSYRDRKKR | 15 |
| 136 | 151 | DIFGLRDSVPDRRKLD | 16 |
| 168 | 183 | WNTNYTHYNRCKSRNY | 16 |
| GP127 | 39 | 55 | ERISSEDMFDNIVYNKD | 17 |
| 79 | 91 | TYPVFNDSSQVKC | 13 |
| 100 | 118 | DNSNISSRTVEIFEREKSS | 19 |
| 124 | 158 | KTTNKKRKVNYGEIKKTVHGGTNANYFSGKKSDEY | 35 |
| 165 | 174 | SNINQPWIKT | 10 |
| 188 | 195 | IVTRGKSS | 8 |
| 255 | 263 | NEYFKEVAN | 9 |
| 281 | 292 | IKKMAKHDVYGV | 12 |
| 353 | 378 | IEMMKERSTILNSIDIETESVDRLKD | 26 |
| GP128 | 5 | 28 | TDSEMDQRLGYKFLVPDPKAGVFY | 24 |
| 55 | 64 | PLLSFKNNTE | 10 |
| 75 | 81 | VTPPDYS | 7 |
| 107 | 121 | MAKEGISITKISSYE | 15 |
| 135 | 151 | GYGNKNPLDTAKYLVPN | 17 |
| 177 | 187 | WPKFRVVKPNS | 11 |
| 199 | 205 | NILPTRY | 7 |
| 236 | 242 | LSQYLSR | 7 |
| 254 | 261 | YDMPPEVV | 8 |
| 263 | 290 | LVNAIIDSAKRLTESITDFNIDTYINDL | 28 |
| 294 | 306 | EHVKQKSQLTINE | 13 |
| 314 | 325 | NFLPHMNYTPDQ | 12 |
| 344 | 356 | YTSRYPDRDSMVC | 13 |
| 388 | 402 | NHKNRGTYAVNIHVL | 15 |
| 416 | 423 | SGKFKKSD | 8 |
| 447 | 464 | YPDQVKISKMFSVRKYHP | 18 |
| 497 | 505 | ILTSEYLDL | 9 |
| 512 | 530 | YIRSYYKDDISYFETGFPI | 19 |
| 552 | 566 | FRRRKRMGFFGNLEV | 15 |
| 606 | 625 | ELESRLDDMTFSDIQKEFPH | 20 |
| 645 | 672 | QKFRMMSKDERKQYDLCDFPAEFRDGYV | 28 |
| 675 | 689 | SLVGINHNSGPRAIL | 15 |
| 693 | 717 | QAKQAISCLSSDIRNKIDNGIHLMY | 25 |
| 728 | 736 | LETSKIAAN | 9 |
| 784 | 801 | LENFNNKERDRSNAYSKL | 18 |
| 826 | 849 | RTLEDDFARDNQISFDVSEKYTDM | 24 |
| 874 | 891 | ERRPILGDKFTTRTSQKG | 18 |
| 899 | 907 | ETELPYDEN | 9 |
| 942 | 967 | PYNNKGENRPVCFPSSNETSIDTYMQ | 26 |
| 974 | 991 | EHLNPKLTEKELSDKIFC | 18 |
| 997 | 1004 | DPETDKPY | 8 |
| 1027 | 1053 | TVRCRGKKTKLIRQANEGRKRGGGIKF | 27 |
| 1094 | 1104 | AAQIKSINTCL | 11 |
| 1106 | 1115 | CSKLNLSPLL | 10 |
| 1144 | 1160 | RRPPSFYKPLDKVDLKP | 17 |
| GP129 | 5 | 74 | RNLEREIARKNCEGNPCERELEYERSNVKRLEYQLDAEKEKVKFYKRELERDRYLSSRYLTSSSDPHKKH | 70 |
| GP130 | 16 | 39 | KLRDGNGNGGNGCTSSCEFERKRI | 24 |
| 54 | 61 | KSLEKFME | 8 |
| GP131 | 5 | 14 | IQRLRDRIMD | 10 |
| 21 | 37 | ECKRNGNGTSSEEVNRL | 17 |
| 80 | 105 | LRRERESDKTDSYYRRELTRERNKIV | 26 |
| 114 | 135 | CFDVNHVKYIDEINSKKNRISD | 22 |
| 141 | 162 | TACKSNGCGNGDMDQYKREIES | 22 |
| 168 | 190 | TKCRRGSNGSHSDCEYYDEEARD | 23 |
| GP132 | 22 | 38 | EKLWNDELSSESCLSRK | 17 |
| 55 | 61 | TTDKKSK | 7 |
| 84 | 93 | FNNGVDAESR | 10 |
| 114 | 120 | RLIKSDE | 7 |
| 231 | 238 | IMKSGDLI | 8 |
| 244 | 698 | TKKVKDLFNTKSDSIYQYVRLHEMSYDGVSEDTDDDDEVFAILNLSIDSSVDRYRNRVLLLTPEVASLRKEYSEAEPDYKYLMDEEVPAYDKHLPKPITNTGIEEPHATGGDKEDQPIKVVHPPNNDKDDAIKSYNPLEDPNYVPTITRTAIGIADYQLVINKLIEWLDKCEEECGNGGEFKTELEEAKRKLTELNAELSDKLSKIRTLERDSVYKTERIDRLTKEIKELRDIQNGTDDGSDSSEIDKKTIRELKESLDREREMRSELEKELDTIRDGKVDGSCQGRLELSRMWLKQRDDDLRAEIDKRRNVEWELSKLRRDIKECDKYKEELDKAKTTISNYVSRISTLESEIAKYQQDRDTLSAVRGELEEERRRVRDLESRLDECTHNQKDTQEVDALRSRISELENKLTDCIESGGGNLTEISRLQSRILDLERQLNDCRHNNKTNTETDR | 455 |
| GP133 | 8 | 17 | WNGIVPMVQD | 10 |
| 32 | 46 | ETWDKKIEANTCISR | 15 |
| 64 | 76 | PKMDENRKSPLGA | 13 |
| 97 | 113 | AYDNESLNTKFKTLNIY | 17 |
| 136 | 155 | NGTPYIYDSEITSNNKNLIN | 20 |
| 205 | 211 | GNVGFHN | 7 |
| 228 | 234 | SDRFLND | 7 |
| 292 | 310 | VEFNKKGIVKVTETKPDND | 19 |
| 322 | 330 | STDVQHIHF | 9 |
| 341 | 426 | ECANIQSSVENATDTGHHQDSKINIKDDDVDDDDYNPKPTPIPEPYPRPPFPRHEYYKRPKLLHVEEPDPVKKDADRIRLDNHILN | 86 |
| 436 | 447 | GHYCCDTAAVDR | 12 |
| 471 | 495 | LLFPWLLPTVHPHAIDGSIPPHGRS | 25 |
| GP134 | 5 | 49 | MDGTLFPGDDDLAIPATEFFSTKAAKKPEAKREAIVKADGDNNEETLKQ | 45 |
| 98 | 107 | KKIDVQTGRR | 10 |
| GP135 | 30 | 72 | YGNIKEFNATHAAFEYSKSIGGTPALDRRVQDVNDTISDVKQK | 43 |
| 92 | 108 | QAEVGPNNTRSIRKFNT | 17 |
| 117 | 123 | FSDVINI | 7 |
| 129 | 138 | CVAPNINNVE | 10 |
| GP136 | 108 | 120 | TNSVTMVDKPTEL | 13 |
| 129 | 136 | QEYRLKSS | 8 |
| 163 | 181 | VEVFNREYNNVKTIMNPDF | 19 |
| 204 | 210 | SWFDFKS | 7 |
| 231 | 248 | MIKVGDCDETVSSYNPES | 18 |
| 270 | 282 | RLESYHRFDITKV | 13 |
| GP137 | 19 | 25 | NKDIDAQ | 7 |
| 45 | 74 | FNINKKSKKNSKSIEQHPVVHHAASAGREF | 30 |
| GP138 | 9 | 32 | RFLEKTSFYNCNDSITKEKIKIKH | 24 |
| 111 | 136 | KVNNNYNNYNNYNNYYNCYNYDDTFFDDDD | 26 |
| GP139 | 5 | 15 | QEKQFLRENLL | 11 |
| 56 | 62 | YNPDYDG | 7 |
| 70 | 81 | NFVSSQESLEYN | 12 |
| 94 | 102 | TVAQNHKKS | 9 |
| 111 | 121 | DVGDKLSKCNT | 11 |
| 144 | 152 | RHVPILGRA | 9 |
| 165 | 182 | SDAENMLRSMPVKGKRKD | 18 |
| 222 | 230 | KDVIEQKLN | 9 |
| 249 | 267 | LESTKTKLCNSDQSSSSKN | 19 |
| GP140 | 5 | 29 | ENDEEQTSVFSATVYGDKIQGKNKR | 25 |
| 73 | 100 | ATAVAAALSTHRKVASSTTQYKHQESCN | 28 |
| 112 | 120 | HSDYQLFSD | 9 |
| 129 | 139 | SSTLPNKSDVL | 11 |
| 148 | 178 | EDTWGSDGNPITKTTTDYQDSDVSQEVRKYF | 31 |
| GP141 | 76 | 87 | RKLRARLPRPDT | 12 |
| 106 | 138 | KKTNNKWLDINNDKDIDISKLTNFKQLNSTTDA | 33 |
| 146 | 154 | SGKLVKTVC | 9 |
| GP142 | 46 | 56 | VRDIKYSDMQK | 11 |
| GP143 | 31 | 38 | TVYNDNKI | 8 |
| 44 | 90 | KKIKSSNSSKSSKSTDNESDWEDHCSAMEQNNDVDNISRNEILDDDSFAGSLIWDNE | 47 |
| 99 | 133 | NESNVIAPSTEHIYDSVAGSTRLINNDCNEQTIYQ | 35 |
| 137 | 211 | VINETETIEVLNEDTKQNPSYSSNPFVNYNKTSICSKSNPFITELNNKFSENNPFRRAHSDDYLNKQEHDDIESS | 75 |
| GP144 | 16 | 29 | KIANFRNAKYREYL | 14 |
| GP145 | 15 | 26 | VVNNNEMYHLIP | 12 |
| 47 | 56 | DNDVNNKNIL | 10 |
| GP146 | 16 | 40 | TDKTGSKKSDRKNKNKIKDYMEHDY | 25 |
| 46 | 58 | VPGSSSTSTSSWY | 13 |
| GP147 | 43 | 49 | KYIRWKL | 7 |
| 58 | 84 | NKTSKTIILSKWHTSAKLHSLSDNDVS | 27 |
| 87 | 95 | IKYKDILPG | 9 |
| 116 | 122 | TNWFNDH | 7 |
| GP148 | 15 | 25 | IEWHKFETSEK | 11 |
| 47 | 63 | FSNNKLNKTGLANTNYI | 17 |
| GP149 | 5 | 13 | YTADNVIPK | 9 |
| 20 | 26 | FVDKDGT | 7 |
| 39 | 45 | GSKRIVK | 7 |
| 55 | 69 | NDECGPSSLSSHRWS | 15 |
| GP150 | 5 | 20 | KQSFSTSNWEDIQSNY | 16 |
| 32 | 48 | EKVVPHNTFDVIEQYNV | 17 |
| 53 | 83 | IKPLFNQPIFKGPSDVKWFDIKEKENEHRKY | 31 |
| 94 | 110 | YSFNTKSKQTRSSQVDA | 17 |
| GP151 | 36 | 57 | ERKLIHTPLIDKTIKDAYIRED | 22 |
| GP152 | 17 | 33 | QTVYDDKSVCDSDNKEY | 17 |
| 44 | 69 | LDEPLRQTTCESEIHKYGASVSNGGL | 26 |
| 99 | 119 | TSLDPWTMEPINSMTYDDLVK | 21 |
| 138 | 173 | KDFIKTNGNRLKPRDFKTVPPNVGSIIELQSDYCVN | 36 |
| 184 | 213 | ECGNIKQHSIPTLRDYFTTTNGQPRKILKK | 30 |
| GP153 | 6 | 18 | KIIEDISKNNNFE | 13 |
| 38 | 46 | RTFAKINPG | 9 |
| 73 | 79 | SLMDENT | 7 |
| 110 | 118 | PTTSRRDVY | 9 |
| GP154 | 24 | 33 | IFRFRSEDVE | 10 |
| 40 | 49 | YFDRIYNNVV | 10 |
| 53 | 75 | YIPEHIPYKYNFINRTFSVDELD | 23 |
| 85 | 95 | FLKHKYGSLNP | 11 |
| 125 | 140 | TSISTILTSKHKTYSL | 16 |
| 158 | 167 | KDINDKYNDI | 10 |
| GP155 | 5 | 27 | GPNKHGNPFIGHEHTLYDISPGH | 23 |
| 45 | 52 | NSVIMNGA | 8 |
| 116 | 125 | QYPGSEIKGN | 10 |
| 150 | 156 | GIEQGSR | 7 |
| 173 | 184 | RILFRKPSLLNN | 12 |
| GP156 | 33 | 49 | INVVEDPQPLVSKVKVI | 17 |
| GP157 | 46 | 62 | GDISRGCNSIGSPEIFI | 17 |
| 78 | 84 | DTDVNIS | 7 |
| 106 | 113 | GISYINEK | 8 |
| GP158 | 31 | 37 | EVNDTHY | 7 |
| 52 | 59 | SYNRHNDS | 8 |
| 99 | 107 | IRHRNTVSG | 9 |
| 121 | 130 | IKQYGDIDLL | 10 |
| 134 | 141 | KLKVDSDS | 8 |
| 173 | 179 | ELTNKKY | 7 |
| 189 | 200 | ADSIPISELSRP | 12 |
| 208 | 229 | LRGHTESIEDEFDYFEDDDSSTCSVVTD | 22 |
| GP159 | 5 | 64 | NIKPSKENRLSILYKDRMDSFKRGSWATSSFREKSHATIQRFLSLRREHVKVDHPDKFLE | 60 |
| 73 | 91 | IQKSSSIDVDKRTKLMSNI | 19 |
| 109 | 117 | ESLDPDNKM | 9 |
| 182 | 190 | KNTFNVPER | 9 |
| 221 | 231 | WNKKFIKPVSD | 11 |
| GP160 | 36 | 44 | LNFPQRSTV | 9 |
| 105 | 111 | KGASMTL | 7 |
| 133 | 156 | KEINRNVGEEIYEDVAFQQKVLQE | 24 |
| GP161 | 5 | 11 | YYSGNLE | 7 |
| 37 | 44 | TIDNDILN | 8 |
| 74 | 88 | QEIYQNELINSLDDN | 15 |
| 122 | 142 | NPDFKTTYAEVLGSRIADIDI | 21 |
| GP162 | 19 | 26 | GYKEKSKL | 8 |
| 48 | 58 | LDDRIYNMNDK | 11 |
| 72 | 81 | QKDMLQDLGY | 10 |
| 94 | 107 | ENTEIRPRNKSILT | 14 |
| 120 | 129 | SITKESHQIK | 10 |
| 153 | 160 | DLKIKAGP | 8 |
| 173 | 221 | DVFRKSNNLKEIIENESKQNLDSISVSVMTPINPMLAESCDSVNKAFKK | 49 |
| 265 | 274 | KEYIPKAFKK | 10 |
| 291 | 298 | NVQLPFGS | 8 |
| 302 | 309 | HKKKEYKN | 8 |
| 324 | 334 | GFDMTDIPLYK | 11 |
| 385 | 394 | NGVYEPGKRR | 10 |
| 400 | 409 | RDYLNEGSMA | 10 |
| 422 | 428 | GKGAKGG | 7 |
| 467 | 491 | TMVKINKDPKKIPEWLVVNKIYIPD | 25 |
| 510 | 521 | FTSSKSHTANGI | 12 |
| 532 | 546 | REDKTWKESTHLNDL | 15 |
| GP163 | 19 | 31 | INHIKNDFMIKPC | 13 |
| 44 | 50 | IDGQSKN | 7 |
| 69 | 77 | KSVYKKNVS | 9 |
| 91 | 96 | RFANLIKIDDDDKTPTGVYNYF | 6 |
| 188 | 196 | RLHGEIPSS | 9 |
| 237 | 246 | NILDNTTIND | 10 |
| 260 | 267 | LDRDEMLN | 8 |
| 285 | 296 | IGEFGSSILGKY | 12 |
| 315 | 321 | QDYIPGR | 7 |
| GP164 | 29 | 44 | RKFDNDAEEQFGTIEE | 16 |
| 50 | 59 | RLNAEEGADN | 10 |
| GP165 | 5 | 12 | YDQYPYRS | 8 |
| 27 | 44 | YDIPELKYPRSNCGGVAD | 18 |
| 54 | 68 | QDSSLISSIDRWKPS | 15 |
| GP166 | 41 | 51 | WMMHQRLPINV | 11 |
| 70 | 77 | NSSVVNGI | 8 |
| 88 | 101 | YDEWTKLSSLNIPR | 14 |
| 134 | 148 | KDRWTLDNSHVLPRN | 15 |
| GP167 | 18 | 31 | PYPQTQISKKIGDD | 14 |
| 71 | 85 | NYTKDKISYDSPYDD | 15 |
| 94 | 100 | SLTAKDA | 7 |
| 113 | 122 | TNDTDKVDYE | 10 |
| 130 | 274 | VNTDSESTIDIILSGSSHSPETSSEKPDYINNFNCSLVFEIATPGPITDNVENHTDTVTYTSDIINTVSTSSRESTTVKTSGPITNKEDHTVTDTVSYTTVSTSSEIVTTKSTANDAHNDNEPSTVSPTTVKNITKSIGKYSTKD | 145 |
| 302 | 310 | KRSRKYKTE | 9 |
| GP168 | 4 | 18 | EGVDYHYVNREAIWK | 15 |
| 32 | 40 | LGNIYGTSK | 9 |
| 89 | 102 | LRRRNTEADDKIHR | 14 |
| 112 | 119 | DEANEAGL | 8 |
| 141 | 148 | QDRIRMYF | 8 |
| GP169 | 5 | 13 | GLVLTDNCK | 9 |
| 46 | 60 | ANGSLFTEQAFYTRV | 15 |
| 66 | 76 | IEEWKKSHHIS | 11 |
| 176 | 190 | SNGEHVPFIRNPNKM | 15 |
| 231 | 240 | WTKIAETKNC | 10 |
| 246 | 256 | TKQKYVNNTTT | 11 |
| 278 | 289 | SLTYFEEPNYDK | 12 |
| GP170 | 5 | 13 | SSNFTNTIS | 9 |
| GP171 | 6 | 26 | EFRRADMVVERFSVSLSPSLT | 21 |
| GP172 | 36 | 54 | NPMNKYPPSVLAKDESIEG | 19 |
| GP173 | 8 | 22 | ISSFSHRNVQHESSN | 15 |
| 36 | 42 | VSRHESN | 7 |
| GP174 | 25 | 34 | SNSSTSHIIQ | 10 |
| 57 | 65 | PNLFHILEY | 9 |
| 91 | 99 | LNINKNGSF | 9 |
| 120 | 135 | NNDHLDNGIRLMLENG | 16 |
| 162 | 169 | YIDAVDSY | 8 |
| 181 | 189 | YKKSESESY | 9 |
| 201 | 210 | SDVDKKDTHG | 10 |
| 235 | 243 | ANIDSVDFN | 9 |
| 268 | 277 | ANVNTRNRFG | 10 |
| 297 | 307 | ESDTELEIDNE | 11 |
| 331 | 341 | IDINYRTIYNE | 11 |
| 364 | 372 | GDFETITTS | 9 |
| 397 | 406 | PSLKIMILSI | 10 |
| 428 | 438 | ACMTDYDTLID | 11 |
| 457 | 468 | DIMKRCYIKNKT | 12 |
| 490 | 496 | SFVKYTS | 7 |
| 526 | 534 | DVGDKWACF | 9 |
| GP175 | 31 | 41 | LTSTETSFNDK | 11 |
| 64 | 94 | DKWKYENPCKKMCTVSDYVSELYNKPLYEVN | 31 |
| 104 | 151 | ETKYFRCEEKNGNTSWNDTVTCPNAECQSLQLDHGSCQPVKEKYSFGE | 48 |
| 175 | 204 | SWNVIPSCQQKCDIPSLSNGLISGSTFSIG | 30 |
| 229 | 277 | KWNPVLPICIRSNEEFDPVEDGPDDETDLSKLSKDVVQYEQEIESLEAT | 49 |
| 305 | 313 | KNNDQYKFH | 9 |
| GP176 | 15 | 27 | ERYRSAFNDNGIY | 13 |
| 31 | 41 | TMIDKLYGYAS | 11 |
| GP177 | 28 | 35 | FDSKIEWT | 8 |
| 47 | 59 | YGIKTWQTMYTNV | 13 |
| 84 | 95 | GDYKVEEYCTGL | 12 |
| 123 | 139 | YATRGSKKIPIYKRNDM | 17 |
| 163 | 169 | IDDYDCT | 7 |
| 193 | 202 | GFLEKITPWS | 10 |
| 222 | 230 | EDVSNFKDK | 9 |
| 236 | 248 | KRKFNKQSQNYMT | 13 |
| GP178 | 20 | 35 | STKYINSCVNSSLSLQ | 16 |
| 46 | 62 | NKTMEQLGITLGSDLEA | 17 |
| 87 | 93 | MDRQLSK | 7 |
| GP179 | 21 | 51 | TIKMQGTTNNNDGSKRTSPIYDNVGNTKDSL | 31 |
| GP180 | 6 | 28 | SGKLPWKNKSSIAIQQKREYKKF | 23 |
| 38 | 46 | PEGNKPLEL | 9 |
| 49 | 64 | TLDYSQTPNYERLRRL | 16 |
| 81 | 87 | MLRISNN | 7 |
| 99 | 129 | DYYGYLQGNRIFYERRECIHFSSDNLVSIDN | 31 |
| GP181 | 43 | 63 | SKYVEKEETMDKVSAQNISFK | 21 |
| 88 | 97 | FQTVDFTDCR | 10 |
| 107 | 123 | DVFTEGKINPLLTEQLS | 17 |
| 141 | 160 | LIPFKKEFTSDYPFYVSPTE | 20 |
| 219 | 229 | DTNFKKWCNSL | 11 |
| 243 | 253 | VTGSYNLVDTL | 11 |
| 257 | 276 | GLTDVFYSTGDYSNMCNSDV | 20 |
| 291 | 300 | EEYTEAAAAT | 10 |
| 304 | 312 | VADCASTVT | 9 |
| GP182 | 7 | 13 | THVFSPQ | 7 |
| 15 | 25 | CGCDRLTSIDD | 11 |
| 40 | 49 | AYRNRQCAGQ | 10 |
| 115 | 124 | WGGEDHPTSN | 10 |
| GP183 | 5 | 15 | EADNDRIIPID | 11 |
| 39 | 45 | NETYSDM | 7 |
| GP184 | 20 | 26 | NNQHHFS | 7 |
| 30 | 37 | YGNNSRCP | 8 |
| 64 | 71 | ITGSHFTS | 8 |
| GP185 | 8 | 14 | VTSLGSN | 7 |
| 40 | 50 | YYEEDNEDGDG | 11 |
| 57 | 66 | KIYTTDKRRV | 10 |
| GP186 | 5 | 39 | FMQVYEYDREQYLDEFIEDRYNDSFIASPEYYSAE | 35 |
| 117 | 125 | TRNLDKVSV | 9 |
| 129 | 139 | KGVKVKKLNRC | 11 |
| 174 | 182 | TDIMPIEAP | 9 |
| 194 | 200 | DIHKRIP | 7 |
| 231 | 240 | SMYRIPPFPI | 10 |
| 247 | 254 | SQYTNDDI | 8 |
| 290 | 301 | FNNIDTAITQEH | 12 |
| GP187 | 14 | 23 | KSTHKIQENE | 10 |
| 47 | 57 | YDLNRRQPVTG | 11 |
| 83 | 92 | VDVTIKPSSG | 10 |
| 118 | 129 | DKTHLSHKDYSN | 12 |
| 140 | 148 | MLLKEEDID | 9 |
| 160 | 168 | IDPNFKQDG | 9 |
| 178 | 186 | CLAHVYKPG | 9 |
| 209 | 217 | ANLNALDNC | 9 |
| 245 | 254 | PNFEICNNHG | 10 |
| 281 | 289 | TNVGEMPID | 9 |
| 318 | 328 | KNIDIHTRYEG | 11 |
| 352 | 361 | GDINALTDNN | 10 |
| 394 | 402 | VIRSLVDQL | 9 |
| 426 | 437 | TFYDRHVQNRDS | 12 |
| 461 | 472 | YEETILLKLSTV | 12 |
| 490 | 506 | KRYLSVLKKYNNDKSFK | 17 |
| 536 | 543 | VFTDKKCL | 8 |
| 561 | 570 | IYDLYNISYP | 10 |
| GP188 | 35 | 65 | DFFNKMKDTLPAKDSKWLNPTCIFGGTMNNM | 31 |
| 79 | 92 | IEDSLLSRRYINKD | 14 |
| 101 | 113 | GKTRRPLNRRVKN | 13 |
| 153 | 168 | PSSCIPEIYELGTHDK | 16 |
| 195 | 206 | INIDDIKYSQTG | 12 |
| 249 | 266 | PSQDHRFKLILDSKINVI | 18 |
| 296 | 314 | GWLIGFDFDVYSVLTSRGG | 19 |
| 325 | 331 | VTEEYIG | 7 |
| GP189 | 15 | 23 | DREHINVDS | 9 |
| 27 | 35 | LCKISNPNS | 9 |
| 49 | 61 | YNYRSVNGKYKYR | 13 |
| 72 | 156 | SDYENYNEYYYDDYDRTGMNSESESDNISIKTEYENEYEFYDETQDQSTQLVGYDIKLKTNEDDFVDEFYGYDRSVGVHDYIDKS | 85 |
| 160 | 183 | VVYGRESYVRWRDIWQEHNDGVYS | 24 |
| 190 | 198 | DNIYEDRHT | 9 |
| 204 | 216 | KIDSVSNVNDAEH | 13 |
| 241 | 253 | MYPRHRYSKHSIF | 13 |
| 279 | 288 | SLTIKDSSNK | 10 |
| 313 | 323 | TIYERRYIVHS | 11 |
| 347 | 358 | LDNYYNTGDRRH | 12 |
| 385 | 396 | NDINARGENTQM | 12 |
| 431 | 440 | GADLTIPNDD | 10 |
| 468 | 482 | KLLNLSRHAPHNLFR | 15 |
| 507 | 517 | DGFDINCYFEG | 11 |
| 541 | 549 | ADISLKTGD | 9 |
| 575 | 584 | PPKSVMSSLT | 10 |
| 610 | 619 | LLLDPSFYSR | 10 |
| 628 | 638 | LNQYDYRCFNY | 11 |
| 641 | 650 | YRVNKKYRKV | 10 |
| 661 | 671 | VQVLKSILIAN | 11 |
| 692 | 704 | NNKQLINTVNSNI | 13 |
| 732 | 741 | ASRSQSSYLS | 10 |
| 757 | 784 | VYDLRKLYARYMLENETDYHIESRSIST | 28 |
| GP190 | 16 | 22 | NRYISSM | 7 |
| 46 | 53 | YIKDYTNH | 8 |
| GP191 | 15 | 26 | MSNISTLITTDA | 12 |
| 43 | 53 | DNVYLYREGYK | 11 |
| 61 | 68 | LEYNYITK | 8 |
| GP192 | 31 | 41 | YNFNNPSLNKV | 11 |
| 50 | 59 | IHVELPPMIM | 10 |
| GP193 | 53 | 86 | TAEQLSKYIENVNENTPDDKKDDNNDMDVDVPYC | 34 |
| 112 | 129 | KDDFQTVNFNNANQTKEL | 18 |
| 135 | 151 | KTMTNGKINSLLTSPLP | 17 |
| 169 | 189 | KYPFSKHLTYTDKFYISKNIV | 21 |
| 207 | 214 | INELFGGF | 8 |
| 245 | 259 | ITEENFKKWCGKLYT | 15 |
| 273 | 280 | MTESYNLV | 8 |
| 288 | 307 | LTNIFGYYADFSKMCNETIT | 20 |
| 321 | 342 | EEYTEASAITGVFMTNFSMVYR | 22 |
| GP194 | 25 | 44 | RKTALFHDNQLGHAEDNQDS | 20 |
| 104 | 124 | DSMEELPTITTYEPSTYNYTF | 21 |
| 132 | 169 | TEELKVTPSPTTYATVTTPLPTSSVPYDQRSNNNVGTI | 38 |
| 176 | 203 | KILGVNETELTNYLITHKNATVDNNTLY | 28 |
| 208 | 217 | FLEINNCYNI | 10 |
| 245 | 255 | SSDTFISSTNT | 11 |
| 264 | 271 | NNTSNISD | 8 |
| 308 | 319 | KIGVKDDKNNTV | 12 |
| 349 | 380 | TNIISSSVSTTNSRKRRDLNGEFEFSTSEELD | 32 |
| 383 | 414 | YKSYGVSDDVSHCFSSPRRRRSDDKQEYTEMK | 32 |
| 423 | 431 | LRIDSVIPR | 9 |
| 466 | 480 | EKIMPRVPTTATEEQ | 15 |
| 483 | 499 | ATINRQTKLPAGVKSTP | 17 |
| 518 | 538 | VTYASSNLPGSSGYVHRPSDS | 21 |
| 545 | 776 | RRTRLPSDTDSDFEDIQTVVKEYNERYGRRVSRTQSSSSDFEDIDEVVAEYRQKYGGASRGRTSSSSSSDFEDIDEVVAEYRQKYGNAMTKGRGSSKPDPLYSTVKKTPKSIASGVDIVSKQTDYSLLPGVNTGSSIVTPLTRRGATRRPKRPSTPPREDLPPLPLNPPYRQLSRGGDHSLQQVPQRDYSPPHRPPPPLPPKPVPAIPPRDSQPNNKGFSKFVSPRRCRRST | 232 |
| 788 | 830 | PNDDTYSLLQLPKIEPEYAEVGNGLPKNNVPVIGNKHSKKYTS | 43 |
| 859 | 876 | QQDRSTALIKKDQMSKDE | 18 |
| 975 | 988 | DSSFKQNTEAMALY | 14 |
| 1072 | 1105 | PYEVPISDMQLLKMATHGEPESTKSIPSDVCDRY | 34 |
| 1168 | 1194 | YDFNDTIIDPNGVAGHASFCTNRSSNQ | 27 |
| 1204 | 1212 | EDVSSCSSR | 9 |
| 1301 | 1318 | ISGIPFSSIYTGSVNGRN | 18 |
| 1333 | 1342 | MYCDNRRPGC | 10 |
| 1348 | 1353 | PFNENS | 6 |
| 1369 | 1376 | TYDTNSID | 8 |
| 1382 | 1389 | KSKTHFPT | 8 |
| 1398 | 1409 | DNLGNGYNKPEN | 12 |
| 1457 | 1466 | TSQDYGDGTN | 10 |
| 1497 | 1505 | FSIPRNISA | 9 |
| 1520 | 1555 | CASNKEWLKSYGYGNTDATKQRVCFHHWNYVTTSLD | 36 |
| 1561 | 1571 | EDIWKSDWPDY | 11 |
| 1585 | 1610 | IWIESKVLQQPPYTFEFTHDDSNEYV | 26 |
| 1698 | 1707 | DIKDIIESEE | 10 |
| 1720 | 1732 | RVKKYYPIDNYLC | 13 |
| 1823 | 1831 | NYLNSSPNI | 9 |
| 1862 | 1885 | RTRKYKIMKDDTMSIKSEHHNSLE | 24 |
| GP195 | 22 | 32 | NGENDGHVSVN | 11 |
| 58 | 67 | CDLNKQLKCG | 10 |
| 93 | 102 | VNNFDNKDNK | 10 |
| 130 | 139 | DDFSKSSDLL | 10 |
| 164 | 172 | SDPNCVDED | 9 |
| 185 | 202 | SAFHESNYYKSKSYTKMR | 18 |
| 217 | 225 | NINAVTKIG | 9 |
| 252 | 261 | ADTRIRNNFD | 10 |
| 287 | 298 | EQKYGKLQKEEG | 12 |
| 309 | 315 | NQGYGSH | 7 |
| 328 | 336 | DIQKDEYYN | 9 |
| 361 | 370 | YDINLPTKDD | 10 |
| 398 | 406 | LKVSLPMIK | 9 |
| 432 | 441 | LRDESFTELH | 10 |
| 460 | 485 | FDKIDSIIKKCNWDISRLKDIQISDT | 26 |
| 499 | 512 | RTYLKAIHLDSHIS | 14 |
| GP196 | 20 | 43 | RDAAPYTPPNGKCKDTEYKRHNLC | 24 |
| 51 | 110 | TYASRLCDSKTNTQCTPCGSGTFTSRNNHLPACLSCNGRCNSNQVETRSCNTTHNRICEC | 60 |
| 114 | 151 | YYCLLKGSSGCKACVSQTKCGIGYGVSGHTSVGDVICS | 38 |
| 155 | 256 | FGTYSHTVSSADKCEPVPNNTFNYIDVEITLYPVNDTSCTRTTTTGLSESILTSELTITMNHTDCNPVFREEYFSVLNKVATSGFFTGENRYQNISKVCTLN | 102 |
| 258 | 282 | EIKCNNKGSSFKQLTKAKNDDGMMS | 25 |
| 307 | 314 | NAQDYETD | 8 |
| 323 | 346 | SYRVGNVLDDDSHMPGSCNIHKPITNSKPT | 24 |
| GP197 | 22 | 35 | QQSSSSCTEEENKH | 14 |
| 46 | 88 | TKQDQTPTNDKICQSVTEITESESDPEVESEDDSTSVEDVDPP | 43 |
| 107 | 121 | KCPQIKSISESANGN | 15 |
| 128 | 145 | SSVPLGQGKDSPAITRAE | 18 |
| 163 | 196 | EEEKDSDIQTHPVLESNISHKKVSYEDIIGSTIV | 34 |
| 213 | 249 | MCKESSDLEVKDGFKYVDGSVSEGVTDDTSLIDSTKL | 37 |

The core similar sequences are marked with the red color. To facilitate alignment, some short epitope sequences are filled up to at least 15 aa by adding flanking sequences and marked with the blue color.

**Extended Data Table 4 | Epitopes of mumps orthorubulavirus.**

| **Protein** | **Start** | **End** | **Epitope** | **Length** |
| --- | --- | --- | --- | --- |
| MuVgp1 | 10 | 29 | RFTIEQELQDRGEEGSIPPE | 20 |
| 116 | 125 | PNARANLTAN | 10 |
| 138 | 159 | PPTINNGTPYVHADVEGQPCDE | 22 |
| 186 | 214 | DQPAGSADRRFAKYQQQGRLEARYMLQPE | 29 |
| 347 | 353 | MRNYTYA | 7 |
| 370 | 546 | RRQQGTVDNRVADDLGLTPEQRTEVTQLIDRLARGRGAGIPGGPVNPFVPPVQQQQPAAAYEDIPALEESDDDGDEDGGAGFQNGAQAPAARQGGQNDFRVQPLQDPIQAQLFMPLYPQVSNIPNHQNHQINRIGGMEHQDLLRYNENGDSQQDARGEHGNTFPNNPNQNAQSQVGD | 177 |
| MuVgp2 phoshoprotein | 4 | 16 | FIKQDETGDLIET | 13 |
| 25 | 192 | LSAPIQGTNSLSKATIIPGVAPVLIGNPEQKNIQYPTTSHQGSKSKGRGSGARPIIVSSSEGGTGGTQVPEPLFAQTGQGGIVTTVYQDPTIQPTGSYRSVELAKIGKERMINRFVEKPRTSTPVTEFKRGGPGAAAQGQTIQEEGIDGNGASAGSKERSGSLSGATP | 168 |
| 194 | 219 | AHLSLPQQDSTPANVGIAPQSAISAN | 26 |
| 283 | 344 | GVPVDELRRSFSDHVTIVSGPGDVSFSSGEEPTLYLDELARPVPKPRPAKQPKPQPVKDLAG | 62 |
| 357 | 378 | VANPQMKQVFEQRLAKASTEDA | 22 |
| MuVgp2 V protein | 4 | 16 | FIKQDETGDLIET | 13 |
| 25 | 171 | LSAPIQGTNSLSKATIIPGVAPVLIGNPEQKNIQYPTTSHQGSKSKGRGSGARPIIVSSSEGGTGGTQVPEPLFAQTGQGGIVTTVYQDPTIQPTGSYRSVELAKIGKERMINRFVEKPRTSTPVTEFKRGAGSGCSRPDNPRGGHR | 147 |
| MuVgp3 | 8 | 21 | IPLPKPPDSDSQRL | 14 |
| 40 | 52 | IRLRKILSGDPSD | 13 |
| 68 | 82 | PETSEFISESSQQKVTPVVTA | 15 |
| MuVgp4 | 98 | 104 | VLEDPQH | 7 |
| 133 | 144 | IPNLFRHHQISA | 12 |
| 155 | 165 | YVKSPAKLIAG | 11 |
| 214 | 229 | KKDSQMAKSMLSDPDG | 16 |
| 247 | 257 | RNKLRSYDENY | 11 |
| 334 | 341 | DYASLAKT | 8 |
| 348 | 372 | KIKVDKDAANYKGVSWSPFRKSASM | 25 |
| 15 | 26 | VTCLGFAVFSSSVCVNINILQ | 12 |
| 35 | 46 | VRQLSYYSQSSSYIVVKLLPN | 12 |
| 56 | 75 | NIQPTDNSCEFKSVTQYNKT | 20 |
| 89 | 100 | ENINNIASPSSGSRRHKRFAGI | 12 |
| 182 | 188 | NMSCQIL | 7 |
| 208 | 219 | QPQLINPALSPI | 12 |
| 239 | 252 | TLSTSISAAEILSA | 14 |
| 310 | 323 | LEIGNEQWSYPAKN | 14 |
| 336 | 343 | NEAERLSL | 8 |
| 362 | 369 | AGSYMRRF | 8 |
| 436 | 451 | ISLSQTINTQPIDIST | 16 |
| 464 | 481 | VKYIKESNHQLQSVNVNS | 18 |
| 516 | 530 | RRINFKTNHINTISSSVDDLIRY | 15 |
| MuVgp5 | 42 | 54 | ALHQRSFSRWSLD | 13 |
| MuVgp6 | 8 | 24 | TMSDNATFAPGPVINAA | 17 |
| 59 | 72 | INDQGLSNQLSSIA | 14 |
| 119 | 164 | CTGKKQVSNCSTNIPLVNDLRFINGINKFIIEDYATHDFSIGHPLN | 46 |
| 233 | 241 | QYLSDGLNR | 9 |
| 262 | 274 | QLETDDYAGSSPPTQKLTLLF | 13 |
| 287 | 300 | VTERTISPTGLEGN | 14 |
| 327 | 370 | PAYGGVLPNSSLGVKSAREFFRPVNPYNPCSGPQQDLDQRALRSYFPSYF | 44 |
| 439 | 447 | YEISFTFTNSGQSSVNMSWIPIY | 9 |
| 455 | 468 | YSFTRPGSGNCSGE | 14 |
| 489 | 496 | YSHQSGIN | 8 |
| 531 | 537 | YGNQGLF | 7 |
| MuVgp7 | 32 | 61 | LPNDLEPDDLGPLANQNWKAIRAEESQVHA | 30 |
| 68 | 87 | VELIARIPSLRWTRSQREIA | 20 |
| 100 | 115 | AYDLRQSMQLPTVWEK | 16 |
| 137 | 177 | NQLTGKPNLFTRSRAGQDVKDYSIPSTRELSQIWFNNEWSG | 41 |
| 194 | 203 | TNQKTGELTD | 10 |
| 306 | 315 | GDPVVDIKGT | 10 |
| 328 | 339 | LTEDNIFTEEEA | 12 |
| 387 | 395 | CAPKVLDFQ | 9 |
| 413 | 431 | RRSHNGIWPPTTLHGNAPK | 19 |
| 434 | 458 | IEMRHDNSELKYEYVLKNWKSISML | 25 |
| 464 | 475 | FDASPDEDLSIF | 12 |
| 480 | 513 | AISCPKQDWMGVFRRSLIKQRYRDANRPLPQPFN | 34 |
| 535 | 543 | VTSGEYLRD | 9 |
| 551 | 559 | SLKEKEIKA | 9 |
| 590 | 605 | MRENGVVLDQLKLTKS | 16 |
| 607 | 658 | LTMNQIGIISEHSRRSTADNMTLAHSGSNKHRINNSQFKKNKDSKHEMPDDG | 52 |
| 719 | 733 | PPSDPTQLDLDTALN | 15 |
| 790 | 801 | VRSLSHSEKKEQ | 12 |
| 818 | 829 | HGIGHHLKEQET | 12 |
| 912 | 928 | FPQTKSLSQDITNAYLN | 17 |
| 990 | 996 | RRPGKGK | 7 |
| 1006 | 1014 | TLNIDYLVP | 9 |
| 1044 | 1050 | AAEEEEE | 7 |
| 1095 | 1105 | SLEVRPLSAKK | 11 |
| 1123 | 1141 | IIEKPNIVQPFLNAINVDT | 19 |
| 1155 | 1162 | WATLLNGR | 8 |
| 1180 | 1194 | LIIGSDECEHCSSGDDKFTWFF | 15 |
| 1205 | 1221 | GIRLDNDPASNPPIRVP | 17 |
| 1225 | 1243 | SKTDERRVASMAYIKGASV | 19 |
| 1261 | 1267 | DTEESWQ | 7 |
| 1279 | 1293 | LTLEQLQSLTPLPTS | 15 |
| 1297 | 1313 | VHRLDDGTTQLKFTPAS | 17 |
| 1329 | 1337 | VLEIDDQVT | 9 |
| 1359 | 1368 | NPPINFSVYE | 10 |
| 1382 | 1440 | RPVESCVVNPPLLPVPFINVPQMNKFVYDPEPLSLLEMEKIEDIAYQTRIGGLDQIPLL | 59 |
| 1461 | 1484 | LDEATSIVNDAVVQADYTSNWISE | 24 |
| 1510 | 1517 | YYLRIQGI | 8 |
| 1556 | 1570 | DVIAPINSPHIASLD | 15 |
| 1602 | 1612 | SESQLTLSDRV | 11 |
| 1631 | 1643 | NYPPKVKGMSPED | 13 |
| 1654 | 1675 | QTVEYVEHIQIEKTNIRRMIIE | 22 |
| 1697 | 1775 | RDSEEGQFLIASYYNSFGYLEPILMESKIFNLSSSESASLTEFDFILNLELSEASLEKYSLPSLLMTAENMDNPFPQPP | 79 |
| 1801 | 1807 | SHMKISD | 7 |
| 1841 | 1878 | SGENPPQRNFAPLPTQFIESVPYRLIQAGIAAGSGVVQ | 38 |
| 1885 | 1899 | NGNSDITDLSTKTSV | 15 |
| 1921 | 1927 | VPGSMNS | 7 |
| 1999 | 2006 | VDPTTSSF | 8 |
| 2015 | 2023 | TLNEQGFSL | 9 |
| 2033 | 2061 | WRRRVEQGQIIQDCIDKVISECVRDQYLA | 29 |
| 2070 | 2089 | GGTPSTRKWLDLPDYLSFNE | 20 |
| 2109 | 2132 | LKEVIEILKGQSSDHDTLLFTSYNVGPLGKI | 24 |
| 2152 | 2160 | CILPTQTRL | 9 |
| 2174 | 2190 | RDVITPMEILKLSPNRK | 17 |
| 2206 | 2218 | GETSDILLNRSYQ | 13 |
| 2234 | 2257 | LLTPDVEDSERIDIDNDIPDYDIH | 24 |

The core similar sequences are marked with the red color. To facilitate alignment, some short epitope sequences are filled up to at least 15 aa by adding flanking sequences and marked with the blue color.

**Extended Data Table 5 | Epitopes of human alphaherpesvirus 3 (varicella zoster virus).**

| **Protein** | **Start** | **End** | **Epitope** | **Length** |
| --- | --- | --- | --- | --- |
| GP01 | 5 | 74 | HYSRRPGTPPVTLTSSPGMDDVATPIPYLPTYAEAVADAPPPYRSRESLVFSPPLFPHVENGTTQQSYDC | 70 |
| 122 | 138 | EEPPNSTTRNYCPEGEG | 17 |
| 165 | 173 | WSTTPSTLH | 9 |
| 187 | 211 | LRDRGLGTSTSGIRTAGGLARTTSG | 25 |
| GP02 | 5 | 23 | SEYGVPEGVRESDSDTDSV | 19 |
| 28 | 40 | HTELMQNNASPLV | 13 |
| 54 | 67 | DVPRPRSRRKASAQ | 14 |
| GP03 | 6 | 12 | ETLAYGH | 7 |
| 22 | 37 | LVRPSLNATAEENPAS | 16 |
| 48 | 56 | GRTVDLPGG | 9 |
| 71 | 80 | GKYSKPGERL | 10 |
| 105 | 112 | EKRSTTLG | 8 |
| 131 | 138 | RTHGLSNR | 8 |
| 148 | 156 | YDMHMQRLM | 9 |
| 160 | 169 | NIAQNTTETP | 10 |
| 180 | 225 | TEDSGEAALTTSDRPTLPTLTAQGRPTVSNIRGILKGSPRQQPVCH | 46 |
| 227 | 235 | VRFAEPTEG | 9 |
| GP04 | 5 | 12 | GASESSQP | 8 |
| 40 | 53 | CPANSHAPTPSPLY | 14 |
| 81 | 92 | RDKPSESPMYVD | 12 |
| 100 | 118 | LNSQRLLPEMANYNTLCDA | 19 |
| 121 | 134 | SAATQQMMLESGQL | 14 |
| GP05 | 5 | 15 | SIPTDPDVSTI | 11 |
| 21 | 192 | NLLPDEPSDDFALEVTDWANDEAIGSTPGEDSTTSRTVYVERTADTAYNPRYSKRRHGRRESYHHNRPKTLVVVLPDSNHHGGRDVETGYARIERGHRRSSRSYNTQSSRKHRDRSLSNRRRRPTTPPAMTTGERNDQTHDESYRLRFSKRDARRERIRKEYDIPVDRITGR | 172 |
| 194 | 246 | IEVVSTAGASVTIDSVRHLDETIEKLVVRYATIQEGDSWASGGCFPGIKQNTS | 53 |
| 256 | 266 | ELYRTFESYKM | 11 |
| 340 | 360 | RDNDLGSRTLPELLRQQRFSD | 21 |
| 381 | 401 | RGSKFVEYDDISCNVQVLQEY | 21 |
| GP06 | 65 | 100 | NHSTFLDGLSGYDYSCRENLLSGDTMVKTAISTPLH | 36 |
| 147 | 159 | FRSSCELISPTSY | 13 |
| 271 | 286 | PKPTKDNHLNHINTGG | 16 |
| 325 | 337 | RVQVSLFGESENS | 13 |
| GP07 | 44 | 88 | TPDLDDVFVKNGREEITQVIPTKRPREVTENDEENQIMHLFCSRD | 45 |
| 98 | 104 | GFSTGDV | 7 |
| 165 | 196 | HHLNRKGLSDNGLCITEATLCKLVKKSVGRQE | 32 |
| 249 | 262 | DTSYNTLETPLYDL | 14 |
| 271 | 283 | TYQVPALPNCSGY | 13 |
| 335 | 344 | TNDRKGLKVP | 10 |
| 372 | 388 | VTYSDFVNKPVLLKSSN | 17 |
| 404 | 413 | RLNMRDYIKK | 10 |
| 420 | 451 | TELGPEIGHKYTITKTYTLSLTYAAKPSKFIG | 32 |
| 465 | 523 | NIEKQFSPYGWSSTIPSNPPGFDELSNFEDSVVSAEALRAANFANDTPNQSGRTGFDTS | 59 |
| 536 | 563 | ATGIATHDVSILSYKTPLEALIGHSEVT | 28 |
| 590 | 619 | SITNRYTLPHEARLIAEDLKQINPCNFVAA | 30 |
| 632 | 654 | TSVKNVSKISSNIPKDQLYINRN | 23 |
| 703 | 795 | PKAVVNPNKDPCYFYKTACPEPTVEVLDDDNLLDITSHSDIDFYIENGELYTCVEENYTEDVWFFDTQTTSEVHTHADVSNNENLHETLPCNC | 93 |
| 837 | 849 | VEYIGPYLRDFSF | 13 |
| 900 | 916 | RNPANFHFHSRPQSNVP | 17 |
| 925 | 964 | GGEYAEFFERKVARNKQIFSSPQISLTKALKERGVTCLDA | 40 |
| 985 | 998 | VHFPGRDREYTLTS | 14 |
| 1024 | 1032 | RYPHRGGRT | 9 |
| GP08 | 12 | 37 | ARIPTEEPSYEEVRVNTHPQGAALLR | 26 |
| 86 | 99 | ECLKQHHFTEDNPG | 14 |
| 105 | 113 | RSHMENSKR | 9 |
| 131 | 139 | AVDVTTDDI | 9 |
| 165 | 255 | GVVAKPQASFDVSHNHELSIAKGENVGLKTSPIKSEATQLSEIKPPLIEVSDNNTSNLTKKTYPTETLQPVLTPKQTQDVQRTTPAIKKSH | 91 |
| GP09 | 14 | 29 | VNTGDMFCSQTIPNRC | 16 |
| 51 | 59 | DDKVSRHQP | 9 |
| 69 | 81 | ELPSEKSVTRGGF | 13 |
| 107 | 113 | DTALADE | 7 |
| 160 | 239 | QSRLLPKNVLKHLDPIFKSIQVQPLSNSPSNYEKPVISEFADISTVQQGQPLHRDSAEYHIDVPLTYKHIINPKRQEDAG | 80 |
| 330 | 392 | NTQIHLKHNVLSNIAFPYAIRGKCGIPGVQWYFTKTLDLIATPSERGTRGFGSTDKETNDVDF | 63 |
| GP10.5 | 21 | 40 | DSSGEPNFAERNFWHASCSA | 20 |
| GP11 | 5 | 31 | DGDRLCRSNAVRRKTTPSYSGQYRTAR | 27 |
| 66 | 92 | FEHKNTTPRVHQPNDSSGSEDDFEDID | 27 |
| 101 | 176 | ARLRHELVEDAVYENPLSVEKPSRSFTKNAAVKPKLEDSPKRAPPGAGAIASGRPISFSTAPKTATSSWCGPTPSY | 76 |
| 201 | 211 | WNSNPPRNNAE | 11 |
| 229 | 299 | LNLIQAANEADLGEGASVSKRGHNRKTGDLQGGMGNEPMYAQVRKPKSRTDTQTTGRITNRSRARSASRTD | 71 |
| GP12 | 5 | 63 | LGTEHHSTDTWNRSKTEQAVVDAFDESLFGDVASDIGSETSLYSHAVKTAPSPPWVASP | 59 |
| 75 | 81 | DFSEGPR | 7 |
| 119 | 149 | STVSTKDHVEMFNLTTRGSVRLPSPPKQPTG | 31 |
| 192 | 209 | KRTTIGLNIQNPDQKAYT | 18 |
| 290 | 306 | PLTASALREINYRRREL | 17 |
| 320 | 333 | KSPLVQQPSFSVHL | 14 |
| 349 | 380 | DAYAVKHPQEPRHVRADHPYAKVVENRNYGSS | 32 |
| 387 | 406 | APPSPSEILPGDPPRPPTCG | 20 |
| GP13 | 5 | 319 | HYNRRQSRRQRISSNTTDSPRHTHGTRYRSTNWYTHPPQILSNSETLVAVQELLNSEMDQDSSSDASDDFPGYALHHSTYNGSEQNTSTSRHENRIFKLTEREANEEININTDAIDDEGEAEEGEAEEDAIDDEGEAEEGEAEEDAIDDEGEAEEGEAEEDAAEEDAIDDEGEAEEDAIDDEGEAEEDAIDDEGEAEEDYFSVSQVCSRDADEVYFTLDPEISYSTDLRIAKVMEPAVSKELNVSKRCVEPVTLTGSMLAHNGFDESWFAMRECTRREYITVQGLYDPIHLRYQFDTSRMTPPQILRTIPALPNM | 315 |
| 335 | 348 | QPISIERILVEDVF | 14 |
| 355 | 361 | SKTHKYG | 7 |
| 366 | 374 | SVYALPYNA | 9 |
| 413 | 420 | SNRISHGD | 8 |
| 443 | 479 | DNFGVGDPCWLEDHLAGLPREAVPDVLQVTQLVLPNR | 37 |
| 531 | 539 | SLKPQFTPT | 9 |
| 586 | 594 | SLPYYYIPV | 9 |
| 646 | 652 | CYKESET | 7 |
| 713 | 722 | AHQTLTSFWK | 10 |
| 734 | 748 | RPTTDVLPKERDRIV | 15 |
| 752 | 775 | PIEMNFRFVGLETIYPREQPIPSV | 24 |
| 786 | 794 | NEILGLDWK | 9 |
| GP14 | 6 | 55 | ARSFSSDDRTRKSYDGSYQSFNAGERDLPTPTRDWCSISQRITSERVRDG | 50 |
| 77 | 101 | DSLTSPVLQSTERHSVLLGLHHNNV | 25 |
| 131 | 138 | DDLKLSGD | 8 |
| 154 | 171 | YTTGAEVPVTSEKVNKKS | 18 |
| 185 | 200 | KPISRHPFKSKVINSD | 16 |
| 225 | 234 | DDPTNPSPDT | 10 |
| 266 | 285 | HLKLQFRRIRGPRASVIPDD | 20 |
| 291 | 298 | LKTGPAVS | 8 |
| 327 | 336 | KEEWRDGLNG | 10 |
| 442 | 464 | SKRYTPLHLRRISEPSSVSDQPY | 23 |
| 468 | 479 | NRLGSPIGTGIG | 12 |
| 491 | 520 | LSDDVNASSHVINTEAPLNSIAPDTNRQRT | 30 |
| 538 | 565 | NHCLDIGHTDGSPVDPTYPDHYTRIKAE | 28 |
| 567 | 647 | EGPVRDESNTMFDQRSDLRHIETQASLNDHVYENIPPKEVGFNSSSDLDVDSLNGYTSGDMHTDDDLSPDFIPNDVPVRCK | 81 |
| 650 | 658 | VTFRKNTPK | 9 |
| GP15 | 5 | 24 | SCWTKVPGFTLTGELQYLKQ | 20 |
| 30 | 42 | RYGVRKRDRTGIG | 13 |
| 84 | 147 | TDSKELAAKDIHIWDIYGSSKFLNRNGFHKRHTGDLGPIYGFQWRHFGAEYKDCQSNYLQQGID | 64 |
| 274 | 294 | TDINDFKWDDFQLDGYNPHPP | 21 |
| GP16 | 5 | 281 | QINLILTIACIQLSTESQPTPVSITELYTSAASRKPDPAVAPTSAASRKPDPAVAPTSAASRKPDPAVAPTSAASRKPDPAVAPTSAATRNPDPAVAPTSAASRNPDPAVAPTSAASRNPDPAVAPTSAATRKPDPAANAQHSQPPFLFENIQCVHGGIQSIPYFHTFIMPCYMRLTTGQQAAFKQQQKTYEQYSLDPEGSNITRWKSLIRPDLHIEVWFTRHLIDPHRQLGNALIRMPDLPVMLYSNSADLNLINNPEIFTHAKENYVIPDVKTTS | 277 |
| 324 | 337 | PNITVVGDPVLTGQ | 14 |
| 361 | 379 | RFGNIGKNFITDAIQEYAN | 19 |
| 392 | 401 | QQKQMDYPPP | 10 |
| 411 | 429 | RDGVSNMKYSAVVTPDVYP | 19 |
| 462 | 482 | DSPINHENSEITGVCDQNKRF | 21 |
| 490 | 497 | PTSELDGP | 8 |
| 509 | 528 | KKFPPFSAVYTYDASTYATT | 20 |
| GP17 | 5 | 35 | GERAVHDENLGVLDRELIRAQSIQGCVGNPQ | 31 |
| 121 | 127 | PISRDLP | 7 |
| 217 | 257 | YRKNRHKQLNTYTDLGFAVVYTQNDRGRVCDHRESSRTLKR | 41 |
| 287 | 294 | KLNHFIKL | 8 |
| GP18 | 4 | 22 | RSRTDDALDMELHAGFDAP | 19 |
| 78 | 86 | NMFDQYNWT | 9 |
| 108 | 115 | HTKDPSTP | 8 |
| 140 | 151 | PGDCGPDDQVQC | 12 |
| 188 | 196 | RLLKTFGFT | 9 |
| 223 | 255 | DINGSKPTPYNLIRSITNSKRILNNVVYGSGSM | 33 |
| 321 | 377 | LKEKLTSMQLFANTESVKDEPPLKKRRNLLTKRNEKNTGNKMGGKLPETTWQEGIGI | 57 |
| 384 | 402 | PPVDPAGTLDYSELSRESD | 19 |
| GP19 | 15 | 24 | LVKPSIISTP | 10 |
| 47 | 57 | YPVGKRENLHG | 11 |
| 104 | 191 | NHDERGTSDLTRVLLSSNTCSIKYNKTSETYDSVFRNSSASCIPSEENKSQDMFLDGCPRQTDRMICLRDQNVCSLTSTMPSRGHPNH | 88 |
| 211 | 217 | EAVDIEA | 7 |
| 287 | 354 | HTSDNLKSVQQVIQDTGLKIPHQMDTSTRSPTYDSWRHGEVFKSLTVATSGKTENGVSVSKYASNRSE | 68 |
| 362 | 376 | ALNLLPPSSSPLDNL | 15 |
| 389 | 410 | TPLTRGRLKLMKRVNIMQNTAD | 22 |
| 437 | 447 | QFIPTPLPLNT | 11 |
| GP20 | 13 | 20 | PECPDINN | 8 |
| 27 | 49 | SNRWLESDFIIEDDYQYLDCLTE | 23 |
| 112 | 120 | RGDESLRVQ | 9 |
| 129 | 147 | PSIQQKVQWLEEKVRDNPS | 19 |
| 209 | 216 | PEKPAITR | 8 |
| 237 | 246 | PKTRLVNVDA | 10 |
| 267 | 276 | LFNTPPPDSD | 10 |
| 278 | 302 | PLAFMIADKNTNFFERHSTSYAGTV | 25 |
| GP21 | 19 | 39 | QHGYKEYIIPPESTTPVELME | 21 |
| 71 | 90 | NLRSVSMETWLTSPILCLTP | 20 |
| 110 | 122 | PFLKDQYPALATL | 13 |
| 163 | 182 | NLPKIATLIPGINDGYTWTD | 20 |
| 255 | 264 | NLIPTENQTK | 10 |
| 310 | 319 | MLVRDEIFRC | 10 |
| 338 | 345 | SYLKGASN | 8 |
| 356 | 380 | DILRTLHGEAFTSTYLRLEREGLGV | 25 |
| 412 | 421 | RNYHMNTQGN | 10 |
| 459 | 465 | PVSFNLN | 7 |
| 552 | 585 | GLAPFKGFTESKYAKGWLHQDGFSTISYLDLPWC | 34 |
| 630 | 643 | KVTTSGELLRPNLD | 14 |
| 645 | 697 | MDELRDMYSCEEKRLEVINILEKNQWSVIRSFGCLSNSHPLLKYKTAFEYEQE | 53 |
| 722 | 728 | ERPDGTI | 7 |
| 755 | 771 | RKATNSGLFAGGELTCT | 17 |
| GP22 | 5 | 19 | PTNSHFTLNEQTLCG | 15 |
| 44 | 76 | GFFGNWSRDLTIGPRFGGLNKQPIHVPPKRTET | 33 |
| 94 | 102 | IQINPTSIG | 9 |
| 113 | 120 | NNFKSTTQ | 8 |
| 152 | 166 | IGEANTLTQAGRDPD | 15 |
| 180 | 189 | TAPWTVGEGG | 10 |
| 208 | 214 | EYTDKQA | 7 |
| 227 | 233 | GCSRMET | 7 |
| 283 | 296 | EAARTDKTSTRRVT | 14 |
| 365 | 428 | NAAWGTEGVANTHQPYNTRALPLVQLSNDPTSPRCSIGEITGVNWNLARQRLYQWTGDFRGLPT | 64 |
| 444 | 460 | PSESVRYTRRMERFGGY | 17 |
| GP23 | 5 | 37 | ICYDTQKLLDDLSNLKVQEADNERPWSPEKTEI | 33 |
| 47 | 59 | RSTQKIPAKHFIQ | 13 |
| 97 | 106 | LDWTIEEPGN | 10 |
| 120 | 140 | DSETLHRLSANKLRTSSKFGP | 21 |
| 166 | 192 | ESPFTHARIGMLESAIAALTQHKFAII | 27 |
| 245 | 252 | TETPVHSI | 8 |
| 272 | 282 | EEAVTNPRTVH | 11 |
| 293 | 308 | RDPYVFETSPGMLARR | 16 |
| 316 | 325 | WESNLLSLST | 10 |
| 341 | 347 | PEAETTS | 7 |
| 397 | 410 | LAGFIHGSVVADEH | 14 |
| 450 | 456 | NETEKRY | 7 |
| 502 | 524 | EAREATYFKQTHNQSSGALLPQA | 23 |
| 542 | 567 | DSRWGITPPVDVGMTPPICVDPPATG | 26 |
| 580 | 595 | AYPTEYNRSSVFVEPS | 16 |
| 636 | 645 | GSGTVPNADG | 10 |
| 693 | 709 | LLPQHVRPLVPDRPSIT | 17 |
| 777 | 788 | KVERDEQFGVWR | 12 |
| 871 | 880 | LTTGENIPGL | 10 |
| 924 | 943 | QEDRVNAPTSYMSHARNLED | 20 |
| 953 | 1016 | DSRQQFIVDSGPQMGAVLTSQCNIGTWENVNATFLHDNVKITTTVRDVISEAPTLIIGQRWLRP | 64 |
| 1027 | 1035 | LGVPGNTSG | 9 |
| GP24 | 14 | 27 | VGSRNQFDGALGPA | 14 |
| 196 | 206 | YTHRPDNVESQ | 11 |
| 218 | 227 | NDGPVSEEAL | 10 |
| 306 | 312 | CSYSEVD | 7 |
| 333 | 345 | RRRPSWTPPSSEE | 13 |
| 355 | 366 | VNNTHSTDNLHK | 12 |
| 377 | 385 | TVDVPDKTQ | 9 |
| 409 | 419 | VDTPESSPTFS | 11 |
| 487 | 494 | VMPDEKDP | 8 |
| 514 | 520 | GTRTHHG | 7 |
| 606 | 612 | LGGSSPI | 7 |
| 696 | 712 | IPEVPQEPPEETDIPPE | 17 |
| 790 | 798 | IHPPPETIQ | 9 |
| 856 | 864 | RATQRASAE | 9 |
| 879 | 897 | QAVKDYETYNNGEVKYPEI | 19 |
| 946 | 961 | TYANEARTTQDTIKSR | 16 |
| 1036 | 1043 | EHPGNART | 8 |
| 1087 | 1097 | TVSTNPESESA | 11 |
| 1323 | 1334 | NPHTPENTNIPP | 12 |
| 1544 | 1554 | TANATEQQEDV | 11 |
| 1628 | 1635 | DGTGPLHT | 8 |
| 1720 | 1730 | NRLQKKQQERK | 11 |
| 1807 | 1817 | IFPPASPNGVF | 11 |
| 1906 | 1913 | ALPDEGIV | 8 |
| 1955 | 1961 | EWGKTNA | 7 |
| 2006 | 2012 | TKPIQRR | 7 |
| 2074 | 2080 | DGDPKGN | 7 |
| 2099 | 2107 | GSNQDPTGG | 9 |
| 2125 | 2144 | KITDPFAPWQLSPPPGVKAN | 20 |
| 2212 | 2223 | DTAPSNTTLEWN | 12 |
| 2246 | 2252 | GAAPTHV | 7 |
| 2302 | 2311 | DSGISSAVSP | 10 |
| 2396 | 2411 | IDSDEDSFPSCPDDPF | 16 |
| 2419 | 2435 | YAPQGPPNLDTTDFYPT | 17 |
| 2455 | 2620 | PVQPVQPAQPVQPAQPAQPVQPAQPVQPAQPAQPAQPAQPAQPVQPVQPAQPVQPVQPAQPAQPVQPVQPAQPVQPVQPVQPAQPVQPVQPAQPVQPVQPAQPVQPAQPVQPAQPVQPAQPVQPAQPVQPAQPAQPAQPAQPVQPAQPVQPAQPVQPAQPIEPGTQ | 166 |
| 2627 | 2637 | KKPQSVKTTLS | 11 |
| 2671 | 2690 | ITPPNNQLSDWKNNPQQNQT | 20 |
| 2705 | 2711 | IPTDDSI | 7 |
| 2718 | 2734 | EKSNQTQKRHQNDPRMY | 17 |
| 2748 | 2761 | PSWVDTAADAPQTD | 14 |
| 2767 | 2778 | KTRQPSPNFPRD | 12 |
| 2782 | 2813 | WGVSSNPFNSPNRDLYESDFSEPSDGYSSESE | 32 |
| GP25 | 5 | 24 | ASSRVVFDPSNPTTFSVEAI | 20 |
| 39 | 49 | SGPLQPGHRVD | 11 |
| 71 | 103 | NHNANTIRRTAMFAETDPMTWLRPTVGLKRTFN | 33 |
| 106 | 233 | IIRPQPPNPSMSLGISGPTILPQKTQSADQSALQQPAALAFSGSSPQHPPPQTTSASVGQQQHVVSGSSGQQPQQGAQSSTVQPTTGSPPAAQGVPQSTPPPTQNTPQGGKGQTLSHTGQSGNASRSR | 128 |
| GP26 | 5 | 19 | TYVRSERRRGCGDNL | 15 |
| 32 | 45 | QCCDGDLPIFDPQR | 14 |
| 136 | 144 | IKRGGGIDR | 9 |
| 172 | 177 | EDPSRT | 6 |
| 189 | 236 | MYKETGNNLDEYIRWRPSFRSPPENGSPNTSVQMQSDSKPALPDTQTT | 48 |
| GP27 | 5 | 60 | ENASEHHPELEDVFSENTGDSNPSMGSSDSTRSISGMRARDLITDTDVNLLNIDAL | 56 |
| 64 | 71 | YFPADSTF | 8 |
| 112 | 137 | KESNDSEKSAYVVPCEHSASVTRRRE | 26 |
| GP28 | 4 | 46 | VESEEPMDGFESPVFSENTSSNSGWCSDAFSDSYIAYNPALLL | 43 |
| 64 | 96 | VPRAIENNVTYEASSAVGVDNEMTSSTTEFIEE | 33 |
| 118 | 124 | RKFGLTP | 7 |
| 163 | 176 | LCRYNVTLVGSFAR | 14 |
| 196 | 214 | TDGGLPGIRPPPGKEMANK | 19 |
| 235 | 320 | ISTSRLDETETRKSFYFNQDGLTGGPQPLAAALANWKDCARMVDCSSSEHRTSGMITCAERALKEDIEFEDILIDKLKKSSYVEAA | 86 |
| 337 | 349 | WNVDERTNCAIET | 13 |
| 358 | 384 | WQANRIENSRDVPKQFSKFTSEDACPE | 27 |
| 398 | 404 | AKCRGRT | 7 |
| 449 | 467 | NAWSLDNPIKLKFPFNDEG | 19 |
| 504 | 515 | FAHPTTADKEVL | 12 |
| GP29 | 7 | 81 | RFFHANQPPMPHSYEMEDLCFDDMQYRWSPSNTPYRSMSRRYKSVSRSGPSMRVRSRTPCRRQTIRGKLMSKERS | 75 |
| 92 | 100 | RSPPEELAT | 9 |
| 135 | 141 | GYHLGLG | 7 |
| 148 | 158 | TASGEPRLCRT | 11 |
| 189 | 200 | DRANMQAASAEP | 12 |
| 285 | 299 | NPEQQTETVVPSIGT | 15 |
| 310 | 320 | NFDGELLLEYK | 11 |
| GP30 | 12 | 41 | LTQASGIKYNPRTGRGSNREFLHSYKTTMS | 30 |
| 53 | 70 | EDVPMEERKGVHVGTLSR | 18 |
| 81 | 115 | VPILDFRCSSPWPRRVNIWGEIDFRGDKFDPRFNT | 35 |
| 125 | 142 | TEAASNGDVSRFATATRP | 18 |
| 175 | 187 | AEVDTACGIRSCS | 13 |
| 201 | 228 | MITQNDATLNGDKNAFHGTSFKSASPES | 28 |
| 234 | 248 | IERTDVYYYDTQPCA | 15 |
| 254 | 260 | SPSSKFT | 7 |
| 293 | 342 | SFGWYQLKPGVDGERVRVRPASRQLTLSDVEIDCMSDNLQAIPNDDSWPD | 50 |
| 356 | 369 | GSNELAFPDATHLE | 14 |
| 381 | 387 | SIPRQSL | 7 |
| 397 | 414 | SCDLPQRYVQEMKDAGLP | 18 |
| 463 | 494 | IYSLKLDGYGSINRGGLFKIWDVGKSGFQRRS | 32 |
| 530 | 539 | NESKRDLPYK | 10 |
| 618 | 674 | PDGGYPATFEYKDVIPDVGDVEEEMDEDESVSPTGTSSGRNVGYKGARVFDPDTGFY | 57 |
| 696 | 737 | LCFTTLTLNFETVKRLNPSDYATFTVGGKRLFFVRSNVRESL | 42 |
| 757 | 768 | PGSSSDEAVLLD | 12 |
| 818 | 851 | NNWAAFERFITAFPDIESSVLSQKAYEVKVIYGD | 34 |
| 860 | 866 | KGVGVEG | 7 |
| 960 | 974 | IAEWNRRAMPSGMAG | 15 |
| 1001 | 1012 | ELSRPPSAYINR | 12 |
| 1026 | 1034 | RQGQIPNVR | 9 |
| 1047 | 1092 | EVEADAKSVALLRGDPLQNTAGKRCGEAKRKLIISDLAEDPIHVTS | 46 |
| 1119 | 1190 | GNDTKLTERLLKRFIPETRVVNVKMLNRLQAAGFVCIHAPRWDNKMNTEAEITEEEQSHQIMRRVFCIPKAI | 72 |
| GP31 | 67 | 75 | GARTTGLAG | 9 |
| 99 | 108 | HVLPSSAAPNLTRACNAA | 10 |
| 120 | 148 | FGFSRCQGPPVDGAVETTGAEICTRLGLE | 29 |
| 197 | 228 | QLFMPDVNRLVPDPFNTHHRSIGEGFVYPTPF | 32 |
| 267 | 274 | DENHEGAV | 8 |
| 280 | 313 | TYTYFQSSSSGTTTARGARRNDVNSTSKPSPSGG | 34 |
| 340 | 360 | EETPTDIKEWPMFIGMEGTLP | 21 |
| 393 | 406 | EDSGMTEAKDGGPG | 14 |
| 423 | 444 | NPQTDRDGHVLSSQSTGSSNTE | 22 |
| 473 | 481 | AGAFTGGHG | 9 |
| 518 | 529 | QRMPRFGQATRQ | 12 |
| 551 | 572 | APYLILRKPGDQTEAAKATMQD | 22 |
| 589 | 611 | RLLDRGAPCSSEGLSSVIVDHPT | 23 |
| 638 | 646 | RDYKIREGL | 9 |
| 694 | 701 | GQQVEGRN | 8 |
| 733 | 751 | SEGPVSAPNPTLGQDAPAG | 19 |
| 777 | 806 | FSGNCTNLSEAARARLVGLASAYQRQEKRV | 30 |
| 825 | 835 | FPRGMPPNSKS | 11 |
| 848 | 858 | NQMPADKLTHE | 11 |
| 870 | 878 | TEEYAALNF | 9 |
| 918 | 939 | GARRPRDPSSVLHWIRKDVTSA | 22 |
| 1009 | 1021 | GGKNVCPLFTFDR | 13 |
| 1039 | 1049 | TGPSSGNRETT | 11 |
| 1079 | 1087 | ARAQHMAFD | 9 |
| 1110 | 1120 | IQTLETPWTVE | 11 |
| 1129 | 1195 | LDEKTTAGDGETPTNLAFNFDSCEPSHDTTSNVLNISGSTVPGLKRPPEDDELFDLSGIPIKHGNIT | 67 |
| GP32 | 96 | 111 | KTRFVYGETKDSNCIK | 16 |
| 211 | 219 | NQGETLHRR | 9 |
| 230 | 288 | KQVRVNVDVDDIIRCLPYIPDVPDIKRQSAVEALRTLQTKTVVNPMGAKNDTFDQTYEI | 59 |
| 315 | 334 | WLTSNSTEGPQRTLDVFVDN | 20 |
| 340 | 348 | EHEKHAELT | 9 |
| 357 | 376 | FGKTPIHFDRAFSEELGSLD | 20 |
| 414 | 423 | ISNPSHDNEA | 10 |
| 433 | 467 | GCEDDLTKEASDSATASECDLNDDSSITFAVHGWE | 35 |
| 478 | 487 | AERKRVYLEH | 10 |
| 543 | 562 | QAGCIIDNRIQEAAFDAHRF | 20 |
| 568 | 574 | VRHTVDA | 7 |
| 593 | 603 | FNHDEHRFAQP | 11 |
| 630 | 652 | GGVVGSNWLLSPFRGFYCFSGVE | 23 |
| 689 | 712 | VDRLGKDPRGCTSQPKGIGSSHGP | 24 |
| 760 | 767 | LAPDSTDP | 8 |
| GP33 | 6 | 42 | YYSKWRNRDRPEYRRNLRFRRFFSSIHPNAAAGSGFN | 37 |
| 68 | 115 | AVVSVSPSSFYESLQVEPTQSEDITRSAHLGDGDEIREAIHKSQDAET | 48 |
| 137 | 146 | RTCPDYHLGK | 10 |
| 191 | 198 | RYADRVPI | 8 |
| 243 | 251 | SKYNSVGSK | 9 |
| 256 | 264 | TNDTYMVAG | 9 |
| 282 | 289 | VEARSIFP | 8 |
| 308 | 345 | GLRDGAYREHSNYAMDRFHQFEGYRQRDLDTRALLEPA | 38 |
| 362 | 368 | KPKRTEV | 7 |
| 374 | 388 | WREVEDVVRDEYAHN | 15 |
| 403 | 415 | ETNEFNLNQIHLS | 13 |
| 431 | 443 | TTRYNSSHVRTGD | 13 |
| 461 | 508 | LSNSLARLYLQELVRENTNHSPQKHPTRNTRSRRSVPVELRANRTITT | 48 |
| 638 | 644 | SRDLLEP | 7 |
| 661 | 674 | YYEDYRYVREIAVH | 14 |
| 689 | 695 | LLKDREF | 7 |
| 702 | 716 | TRDELRDTGLLDYSE | 15 |
| 733 | 741 | KVVQYDSGT | 9 |
| 823 | 874 | PLTTKGLKQLPEGMDPFAEKPNATDTPIEEIGDSQNTEPSVNSGFDPDKFRE | 52 |
| 889 | 928 | ERQESKARKKNKTSALLTSRLTGLALRNRRGYSRVRTENV | 40 |
| GP34 | 5 | 25 | NINALQQPSSIAHHPSKQCAS | 21 |
| 29 | 91 | ETVKDSPPAIYEDRLEHTPVQLPRDGTPRDVCSVGQLTCRACATKPFRLNRDSQYDYLNTCPG | 63 |
| 113 | 122 | FPDTPEEKWM | 10 |
| 127 | 140 | IPDREQPSSGDEDS | 14 |
| GP35 | 24 | 34 | KDEGELNITPE | 11 |
| 95 | 104 | FGNRDSVLSP | 10 |
| 124 | 134 | KRLSPNEIPDG | 11 |
| 163 | 176 | IEPFRVLSMESKAR | 14 |
| 180 | 196 | LVKDYAGLNKVWKVSED | 17 |
| 217 | 327 | DVVAKRRREAGIMGHVYLQASTGYGLARITNVNGVESKLPNAGVINATFHPGGPIYDLALGVGESNEDCEKTVPHLKVTQLCRNDSDMASVAGNASGISPQPPSGVPTGGE | 111 |
| 335 | 363 | YYSQLLTGQTKNPQVSIGAPNNGQYIVGP | 29 |
| 369 | 388 | PPAFPFNTGGYGCPPGHFGG | 20 |
| 396 | 503 | PPPNRLEMQMSAFMNALAAERGIDLQTPCVNFPDKTDVRRPGKRDFKSMDQRELDSFSSGESQMDGEFPSNIYFPGEPTYITHRRRRVSPSYWQRRHRVSNGQHEELA | 108 |
| 511 | 595 | QEVTELKSQNGTQMPLSHHTNIPEGTRDPRISILLKQLQSVSGLCSSQNTTSTPHTDTVGQDVNAVEASSKAPLIQGSTADDADM | 85 |
| GP35.3 | 5 | 22 | AGNASGISPQPPSGVPTG | 18 |
| 41 | 56 | TKNPQVSIGAPNNGQY | 16 |
| 114 | 195 | GIDLQTPCVNFPDKTDVRRPGKRDFKSMDQRELDSFSSGESQMDGEFPSNIYFPGEPTYITHRRRRVSPSYWQRRHRVSNGQ | 82 |
| 211 | 288 | TELKSQNGTQMPLSHHTNIPEGTRDPRISILLKQLQSVSGLCSSQNTTSTPHTDTVGQDVNAVEASSKAPLIQGSTAD | 78 |
| GP36 | 17 | 24 | GIFLSTTK | 8 |
| 32 | 57 | PIHYWTAPAFELRGRMNPDLEKNTLT | 26 |
| 72 | 80 | GETITLPTE | 9 |
| 99 | 131 | LDSLETAAAEAEEADAQSEECTRTEIIRNESIH | 33 |
| 142 | 148 | PLQYDTN | 7 |
| 162 | 170 | ARGNNSPGI | 9 |
| 245 | 256 | SVHEPQVSSFGN | 12 |
| 273 | 305 | TTHENKNSYQFCYDRLPRDQFHARGGRYDQGAL | 33 |
| 319 | 345 | VLPPAPGQFNPGVNDIIDRNHTAYVDK | 27 |
| 407 | 434 | SEATGTPTNNVILRGATGFDGKFKSGNN | 28 |
| 472 | 493 | TQLSRGSLGRTVIDISSGQYQD | 22 |
| 504 | 515 | EHRRQNVTSLPI | 12 |
| 538 | 558 | HQPRVRAALEESRRLAQFNVN | 21 |
| GP37 | 30 | 42 | DNVRRGFADAFNP | 13 |
| 47 | 59 | LLSPLSHVDVQRA | 13 |
| 103 | 118 | FSANIHTPTKYHQFCE | 16 |
| 155 | 163 | LNLLQVTRL | 9 |
| 182 | 246 | VAEYTPPIRSVRERRRLCKKKIHVCSLAKKRAKSCHRSALTKFEENAACGVDLPLRRPSLGACGG | 65 |
| GP38 | 34 | 40 | HHFAITP | 7 |
| 68 | 82 | TQTRRLNGDVSPEDA | 15 |
| 107 | 122 | LMDTSTSDLVQVNKEP | 16 |
| 183 | 194 | RVSKRARPGETV | 12 |
| 220 | 252 | NWHAGWNTLSFCNDVFKQKLQKSECIKLREVPG | 33 |
| 265 | 272 | ELCGEFGN | 8 |
| 311 | 328 | TLLPQMTPANMSSGAWNI | 18 |
| GP39 | 18 | 46 | NKSYVTPTPATRSIGHMSALLREYSDRNM | 29 |
| 53 | 71 | FYPTGFDEELIKSLHWGND | 19 |
| 82 | 89 | VNPTTHEG | 8 |
| 100 | 133 | LLSPYHFKAEHRAPFPAGRFGFLSHPVTPDVSFF | 34 |
| 162 | 201 | ERAETAATAERPFGVSLLPARPTVPKNTILEHKAHFATWD | 40 |
| 214 | 223 | IITNSTLRIH | 10 |
| 284 | 302 | AVTSDTTWFQLNPPGPDPG | 19 |
| 353 | 361 | KADQHDINE | 9 |
| 415 | 433 | HPNTISGTSDLIFADPSQL | 19 |
| 442 | 457 | GQVKPANVDYFISYDE | 16 |
| 470 | 476 | RGQDHVN | 7 |
| 493 | 501 | LVKQNLNAT | 9 |
| 517 | 526 | REGLENSSRV | 10 |
| 559 | 567 | LNPSKHMFT | 9 |
| 582 | 588 | DLTEEIH | 7 |
| 598 | 618 | TRPGLNEVLHTQLDESEIFDA | 21 |
| 630 | 636 | TAKDLHI | 7 |
| 638 | 654 | HTHVPEVFTCQDAAARN | 17 |
| 701 | 711 | DTCVSEHGVIE | 11 |
| 756 | 773 | AAMGNSTIPPFNPDMHGD | 18 |
| 792 | 800 | FERRQAIRM | 9 |
| 831 | 838 | RLREYNKI | 8 |
| GP40 | 70 | 80 | NRTGKTWAVSS | 11 |
| 97 | 113 | SGAVDRDLCGTFDVEVE | 17 |
| 190 | 206 | DGTPEIRDALNGSNDDE | 17 |
| 218 | 249 | DVVTEDVKADDVPISGEPYSEKQPRRRKKSDH | 32 |
| 261 | 275 | IPRVMDIWDPRHKAT | 15 |
| 297 | 309 | RKWPGLEDELNEA | 13 |
| 323 | 338 | ERGELPFFGHAYGRDL | 16 |
| 372 | 387 | NALPSDDDTDQVAQDL | 16 |
| 420 | 436 | LPCYKETSHLAKKEGVR | 17 |
| 442 | 462 | KTGVGLSDTVPVDVSVTERHE | 21 |
| 529 | 538 | HQTPFGDGKK | 10 |
| GP41 | 6 | 14 | ARVSEQTKD | 9 |
| 23 | 39 | HPEEDAKVCKSSDNSPL | 17 |
| 60 | 71 | CTRTSTVNRSAF | 12 |
| 131 | 142 | IRSDLLPLSTSQ | 12 |
| 177 | 200 | GHLQSEVIFPDSVSKILPVSWGPS | 24 |
| GP42 | 9 | 28 | NVITTTESDRIAGLFNIPAG | 20 |
| 54 | 62 | IRSDDNSLY | 9 |
| 117 | 126 | ARDGPHPVDQ | 10 |
| 214 | 224 | NKFQPEGHLNR | 11 |
| 270 | 282 | VMVSRITHTNTRG | 13 |
| 349 | 377 | DITDPNTLNIPSIPPQSNSDSTTAGLPVN | 29 |
| 405 | 412 | TRVAYPLI | 8 |
| 428 | 452 | ANSMDRYTRHAGDFSTVSEQDPRQF | 25 |
| 491 | 515 | VALRQQHLDRQCYFGVYVAEGTEDT | 25 |
| 529 | 552 | DMMPHHPHWVNEHLTILQFIAPSN | 24 |
| 570 | 585 | GDVDLPGPQRPPEAMP | 16 |
| 726 | 733 | IQGEGHNG | 8 |
| 759 | 770 | LIYRDEAARDRL | 12 |
| 776 | 824 | SGRNGYQALHFVDMAGHNFQRRDNVLIHGRPVRGDTGQGIPITPHHDRE | 49 |
| 867 | 902 | IPADEEAPTTPEDPRHPLHAHQLVPNSLNVYFHNAH | 36 |
| 932 | 945 | APDAGAATATTRNM | 14 |
| 994 | 1008 | GMTNARRVLAKMVPP | 15 |
| 1152 | 1161 | RGGVPMLHDN | 10 |
| 1170 | 1199 | TASGGRLNPTEPLPIFGGLRPATSAGIARG | 30 |
| 1215 | 1225 | LQYFRTACNPR | 11 |
| 1246 | 1267 | FDHTQSDVAYTDRATLNPWASQ | 22 |
| 1277 | 1301 | NGTYNLTGASPIYSPCFKFFTPAEV | 25 |
| 1317 | 1328 | AVASQSSTDTEY | 12 |
| 1366 | 1373 | HAGETGAD | 8 |
| GP43 | 15 | 22 | LSPAETSA | 8 |
| 36 | 57 | LRHRASLVDIALSSYYINGAPP | 22 |
| 120 | 131 | GSADSIRLDSVG | 12 |
| 161 | 174 | AAGAQILPHEVLRG | 14 |
| 185 | 197 | YELETNLQHRDGS | 13 |
| 251 | 267 | QLINIPPMPRIQDGHRR | 17 |
| 302 | 312 | PSTVHPGDRTA | 11 |
| GP44 | 11 | 52 | GEESVRYFERLKRRRDERFGTLESPTPCSTRQGSLGNATQIP | 42 |
| 92 | 120 | MFGAFLSSTGYNCTPNVVLKPWRYSVNAN | 29 |
| 130 | 149 | SSVQFYEYSPEEAAPHRNAY | 20 |
| 183 | 209 | FESIEECGSHGKRAKVDVPIYGRYKGT | 27 |
| 315 | 328 | EQWFGANYVDHVKG | 14 |
| 350 | 357 | NTNGIRGQ | 8 |
| 397 | 403 | TGKASTS | 7 |
| 408 | 415 | LRGSSDQL | 8 |
| 427 | 435 | MPRVLAHSD | 9 |
| 445 | 451 | NKPVFIT | 7 |
| 474 | 493 | GGRKQNSGGVGFDRPLFTKT | 20 |
| 614 | 623 | VLEKGNVLSS | 10 |
| 696 | 707 | EVIKGGMGNLDT | 12 |
| 737 | 743 | CIPDSVF | 7 |
| GP45 | 11 | 18 | HALWHNDH | 8 |
| 38 | 49 | DPALLILKKPGQ | 12 |
| 63 | 69 | GQCEPWC | 7 |
| 88 | 102 | KTEPFVSHVFSATHN | 15 |
| 149 | 159 | PNGTRYFADGQ | 11 |
| 173 | 180 | RCTPRLAS | 8 |
| 193 | 237 | MGESHTSNGDNIGPVSSIIDLDRQLTSGGTDDSPAETRIQENNRD | 45 |
| 249 | 261 | VNSRHPVRPSSSR | 13 |
| 274 | 313 | GAQTSNTDPINNGSFDGVLEPPGQGRFTGKKNNSSASIPPLQDVLLF | 40 |
| 344 | 353 | GDTPADFWKR | 10 |
| 378 | 394 | SSAWGGRITGSPILYHS | 17 |
| 408 | 419 | VDNPQSLHVTAR | 12 |
| 433 | 442 | LNNQTPLPAF | 10 |
| 471 | 479 | QTNPTLQQL | 9 |
| 484 | 490 | IADSSQT | 7 |
| 535 | 545 | YTRPQGGGYIP | 11 |
| 549 | 556 | ASFPCWLG | 8 |
| 587 | 614 | VGIGNSTQLRGKFIRSADIVDIGICSKY | 28 |
| GP46 | 11 | 22 | TATGAARKLTPE | 12 |
| 60 | 70 | IAPFIPLQTDT | 11 |
| 85 | 92 | PRQMNLPP | 8 |
| 132 | 171 | PIAYPLPTSIPDPRADPTPADLTPTPNLSDYLQPPRLPKN | 40 |
| 227 | 233 | CDECNHR | 7 |
| 242 | 250 | LPHVTNHAE | 9 |
| 260 | 275 | WRKAGQRELKVEVDIG | 16 |
| 295 | 301 | NPRITAN | 7 |
| 348 | 359 | FPETQRLSGEPE | 12 |
| GP47 | 5 | 16 | TPTYASHRRNRV | 12 |
| 37 | 45 | RGGASVQDP | 9 |
| 86 | 92 | EEQTSIQ | 7 |
| 96 | 104 | NTNRRYIAP | 9 |
| 111 | 144 | DKTEDDNTDNIDRLEDAVGPNIEHENHTWFGEDD | 34 |
| 156 | 195 | HPPTSKYLQLQDLCVPTTIPTDMNQMQPQPISKNENPPTP | 40 |
| GP48 | 5 | 122 | DTPPNLQISPTAGPLRSHHNTDGHEPNATAADQQERESTNPTHGCVNHPWANPSTATCMESPERSQQTSLFLLKHGLTRDPIHQRERVDVFPQFNKPPWVFRISKLSRLIVPIFTLNE | 118 |
| 130 | 139 | QIRDRPRFAG | 10 |
| 162 | 168 | RVFNREL | 7 |
| 212 | 230 | MDEYIVRLSRRLTIPDHID | 19 |
| 267 | 275 | VDNFASLEI | 9 |
| 331 | 357 | NQPPEILLDYINGTGLTKYTGTLPQRV | 27 |
| 379 | 400 | LPGQLPISVHRTPHYHYYGHKL | 22 |
| 422 | 449 | SDIPGDLNYNPFIHAGELNTRISRNSLR | 28 |
| 462 | 475 | THSKLFEGIRIPAS | 14 |
| 500 | 506 | LWHDRDW | 7 |
| GP49 | 5 | 42 | GLDRIDISPQPAKKIARVGGLQHPFVKTDINTINVEHH | 38 |
| 45 | 58 | DTLQKTSPNMDCRG | 14 |
| 94 | 110 | LFFKTSTQPQEPHPEEL | 17 |
| 153 | 177 | KWSVSGPVIPPQWFYHHNTTDTYGD | 25 |
| 201 | 241 | DPADIRTPDHLTPEATTKFFNFDMLNTKSPSLLVGTPRIGT | 41 |
| 294 | 306 | LFDPDDKNNPLGR | 13 |
| 336 | 346 | GPSANPSTREA | 11 |
| 352 | 367 | VEWKRLGFKGGRALTE | 16 |
| 465 | 479 | TQAAAIYEYNWPTIP | 15 |
| 519 | 548 | LRWDNLHPAVEEESVDCANGTTSLLRATEK | 30 |
| GP50 | 5 | 11 | SSSGRGG | 7 |
| 31 | 78 | ALNSEFFEDFDFDENVTEDADKSTQRRPRVIDVTPKRKPSGKSSHSKC | 48 |
| GP51 | 4 | 29 | QKKGPRSEKVSPYDTTTPEVEALDHQ | 26 |
| 76 | 95 | YELFNATLDGGVWSGNRGGY | 20 |
| 136 | 143 | TKNQRVRQ | 8 |
| 205 | 223 | KLDETNIKAVANLRQQSVF | 19 |
| 326 | 334 | DPISVQSPR | 9 |
| 366 | 431 | RQKRSRFYGAVRRVPERVRGYIRKVKPAHRNSRRTNYPSQGYGYVYENDSTYETDREDELLYERSN | 66 |
| GP52 | 5 | 15 | TGESNAAVYAS | 11 |
| 25 | 58 | GGDLVSWIKHTHPGISLELQLDVPVKLIKPGMSQ | 34 |
| 106 | 127 | QRFNDAGLSGFVTYLTSETYIM | 22 |
| 141 | 148 | RVSSEAID | 8 |
| 220 | 266 | TYAGVGFSGRTCTILRDMGIDTLVRVIKRSPEHEDVRTIHQLRGTFF | 47 |
| 286 | 292 | LSFSELV | 7 |
| 308 | 318 | STRPLCNVNEW | 11 |
| 382 | 411 | SRTRCGPLFSPMLLNFTIANKFQWFPTHTQ | 30 |
| 425 | 433 | ANAFTRSNT | 9 |
| 443 | 450 | HLFERCSL | 8 |
| 475 | 483 | GMGPITDVS | 9 |
| 509 | 528 | RQDNDSCLTDFGPSGFMADN | 20 |
| 535 | 551 | KYLMESINTEEQIKVFK | 17 |
| 553 | 559 | LACPIEQ | 7 |
| 575 | 604 | PEALEAFDVFQKIYTHYASGWFPVLDKTGE | 30 |
| 635 | 650 | WNPSTEGCVTQVLDTD | 16 |
| 676 | 682 | DAKIILN | 7 |
| 693 | 707 | DGCHNQCFRPIPTKH | 15 |
| 726 | 746 | VTKSTQTFPGSTRVKNLKKKD | 21 |
| 755 | 766 | NVDRSACRTYRQ | 12 |
| 776 | 789 | HSFSQQRYKITAPA | 14 |
| 795 | 807 | YFQAHQMHLAPHA | 13 |
| 819 | 832 | SPGSWPRINGAVNF | 14 |
| GP53 | 26 | 33 | QSGQLTQN | 8 |
| 62 | 74 | EDLCRYSRHGGSV | 13 |
| 87 | 101 | SSAALDAWPLEPLGN | 15 |
| 146 | 155 | DEHALNNDNT | 10 |
| 197 | 205 | NGDTQQQTP | 9 |
| 218 | 242 | RRKYKSTFSPPIEREGQTSDLFNLE | 25 |
| 307 | 314 | ELNPKGED | 8 |
| 330 | 338 | RTQTPAVES | 9 |
| 366 | 400 | PWGQHPPLPPRVQDLIGQIPQDTGHADATVNWDAG | 35 |
| 448 | 454 | MRRGMGC | 7 |
| 514 | 523 | LHTRNVCSDQ | 10 |
| 618 | 637 | ERIQENCIWDRVLYDIWAGQ | 20 |
| 655 | 674 | DRRYTPVYWSLQEQNSETKA | 20 |
| 680 | 692 | LTYGHMQDKDYKP | 13 |
| 701 | 707 | PNPHGPP | 7 |
| 748 | 767 | HNDFSSPSLKFTDDPLASYN | 20 |
| GP54 | 11 | 37 | FEQTGGAGMADGMSGINIPSILGCSVT | 27 |
| 75 | 84 | GLKPRFLANS | 10 |
| 101 | 121 | VLNGDSSEVSCDRYYMECVTQ | 21 |
| 262 | 276 | CGVGQRFDLPHGTPP | 15 |
| 288 | 297 | LLNGPLRDSE | 10 |
| 308 | 317 | NRTMVTPKNV | 10 |
| 322 | 328 | TYKNSPR | 7 |
| GP55 | 6 | 41 | SLFNNSSGSEEKRIASSVSIDQGLNGSNPNDQYKNM | 36 |
| 43 | 60 | DIYWNEYAPDIGFCTFPE | 18 |
| 129 | 154 | HHIQQCNLHAGALAERYGLCGESEAV | 26 |
| 187 | 193 | GLNGRVG | 7 |
| 212 | 229 | KVRSEQNGTPAPLNTYMG | 18 |
| 273 | 279 | YYNYNRR | 7 |
| 349 | 374 | NEDDRSHSTRAVDRIMGENDTTRAGS | 26 |
| 387 | 398 | KNMRHVGDITET | 12 |
| 400 | 441 | RSYLEETGNHILEGSGSVDTSQPGFGKANQSFNGGAMSGTTN | 42 |
| 476 | 532 | NSDLTERLQFKEGELKRLREERVKIKPSKGSHITMAEETRIADLNHEVIDLTGIIGD | 57 |
| 544 | 558 | YIPPYGDDIKRLSEL | 15 |
| 568 | 580 | KLHRVNNNQGQEI | 13 |
| 606 | 614 | LGFLVTQSE | 9 |
| 651 | 766 | VIKRGPRRTPSPSWGLPDPTEDDERIPEPNKINNQYMHVGYKNLSHFMKGHPPERLRVHKVNAADSTLLDKIRANRRRGDGRWDVRNKYTQHFRLQRNDRQLTNTSRRGVGCERRD | 116 |
| GP56 | 4 | 25 | SISVDSSSPKNVFNPETPNGFD | 22 |
| 53 | 79 | IPKERVPRLCWFKQLLELQAPPEMQRN | 27 |
| 154 | 173 | GRYAYNWTTTPPSIEDLQKR | 20 |
| 191 | 205 | QMGDDGRGGTSTFKT | 15 |
| 210 | 233 | ERLLNKPTGSMSGTAFIACGSLPA | 24 |
| 287 | 307 | TQTDSLESHFQHDMQRSHVTP | 21 |
| 354 | 385 | YGLPITEAHARLVDTFVVPASYINNPANLPGW | 32 |
| 434 | 450 | RKLTGQPGLSVEHWIRA | 17 |
| 452 | 476 | SGRLHNYSQSRDHDMGTVKYETHSN | 25 |
| 522 | 531 | SFVKARGETS | 10 |
| 555 | 644 | LNKNLHPDKVSLAYKRLAALTLELLSGTNKAPLHEAAVNGAGAGIDCDGAATSADKAFCFTKAPESKVTASIPEDPDDVIFTALNDEVID | 90 |
| 648 | 659 | CQYEFSYPKSSN | 12 |
| 736 | 757 | PVFVEELTRKKLYRETTEMLYA | 22 |
| 779 | 788 | VCEFTESIED | 10 |
| 852 | 863 | NPLRERYEKSAE | 12 |
| GP57 | 47 | 54 | PAMSISGP | 8 |
| 67 | 76 | RRVLHWTLPD | 10 |
| 96 | 103 | DARCDTMS | 8 |
| 133 | 142 | HRDFHLQDKP | 10 |
| 190 | 229 | RVNRPDDQTTPTPTPHQYTSQRRQPETNCPSPQPAFFTSD | 40 |
| GP58 | 4 | 22 | RERNVFGNASVATPGEHQK | 19 |
| 40 | 67 | YTGKWSDCRKHGKSVMYNTGEARHPTCK | 28 |
| GP59 | 18 | 69 | WGLHRGPCSIPNFKQVASQHSVQTDFTENSVDANENFPIGHAGCIEKTKDDY | 52 |
| 82 | 90 | DELGRRQLT | 9 |
| 113 | 138 | AFSGRGVSRQKHVTLSKNKFNPSSHK | 26 |
| 163 | 180 | RARRPRRYYTRSTDGKSR | 18 |
| 197 | 218 | LLHKENTLTDQPINTENSGHGR | 22 |
| GP60 | 5 | 106 | GEPTVCSNAYANEMKLSDSKDIYVLAHPVTKKTRKRPRGLPLGVKLDPPTFKLNNMSHHYDTETFTPVSSQLDSVEVFSKFNISPEWYDLLSDELKEPYAKG | 102 |
| 112 | 120 | NRLLNSGEE | 9 |
| 184 | 194 | YPNMTPPTHGC | 11 |
| 216 | 226 | TPGSHVYLGWG | 11 |
| 253 | 260 | QKTTQPNS | 8 |
| 274 | 284 | LSRVPFRNCRH | 11 |
| 293 | 299 | TRKGEPE | 7 |
| GP61 | 48 | 69 | PCVSSVYEAWDYAAPPVSNLSE | 22 |
| 113 | 119 | EEHKSGD | 7 |
| 133 | 147 | VDSTPSSTNIPENGC | 15 |
| GP62 | 4 | 15 | ILAGGSGTSDAS | 12 |
| 60 | 250 | PVQSILHKIVSDTSYKEYEVHPSDDDGFSEPSFEDSIDILPGDVIDLLPPSPGPSRESIQQPTSRSSREPIQSPNPGPLQSSAREPTAESPSDSQQDSIQPPTRDSSPGVTKTCSTASFLRKVFFKDQPAVRSATPVVYGSIESAQQPRTGGQDYRDRPVSVGINQDPRTMDRLPFRATDRGTEGNARFPC | 191 |
| 255 | 261 | LLGWLDD | 7 |
| 265 | 272 | ELYQPEIV | 8 |
| 330 | 337 | WTWKDTAI | 8 |
| 341 | 363 | TGPIVRPETTSTGETSRGDERDT | 23 |
| 366 | 391 | VNTPQKVRLFSVLPGIKPGSARGAKR | 26 |
| 394 | 400 | FHTGRDV | 7 |
| 409 | 464 | TSESDSACKGSKTRKVASPQGESNTPSTSGSTSGSLKHLTKKSSAGKAGKGIPNKM | 56 |
| GP63 | 5 | 525 | PMQRSTPQRAGSPDTLELMDLLDAAAAAAEHRARVVTSSQPDDLLFGENGVMVGREHEIVSIPSVSGLQPEPRTEDVGEELTQDDYVCEDGQDLTGSPVIPLAEVFHTRFSEAGAREPTGADRSLETVSLGTKLARSPKPPMNDGETGRGTTPPFPQAFSPVSPASPVGDAAGNDQREDQRSIPRQTTRGNSPGLPSVVHRDRQTRSISGKKPGDEQAGHAHASGDGVVLQKTQRPAQGKSPKKKTLKVKVPLPARKPGGPVPGPVEQLYHVLSDSVPAKGAKADLPFETDDTRPRKHDARGITPRVPGRSSGGKPRAFLALPGRSHAPDPIEDDSPVEKKPKSREFVSSSSSSSSWGSSSEDEDDEPRRVSVGSETTGSRSGREHAPSPSNSDDSDSNDGGSTKQNIQPGYRSISGPDPRIRKTKRLAGEPGRQRQKSFSLPRSRTPIIPPVSGPLMMPDGSPWPGSAPLPSNRVRFGPSGETREGHWEDEAVRAARARYEASTEPAPLYVPELGDPARQ | 521 |
| 535 | 555 | CPDRDPIAWLQNPKLTGVNSA | 21 |
| 561 | 592 | QKLLPPGRAGTAVTGSVASPVPHVGEAMATGE | 32 |
| 607 | 617 | SRRYDRAQKHF | 11 |
| 627 | 797 | AGMAYPEATGSSPAARISRGHPSPTTPATQTPDPQPSAAARSLSVCPPDDRLRTPRKRKSQPVESRSLLDKIRETPVADARVADDHVVSKAKRRVSEPVTITSGPVVDPPAVITMPLDGPAPNGGFRRIPRGALHTPVPSDQARKAYCTPETIARLVDDPLFPTAWRPALS | 171 |
| 811 | 826 | PGGGDRRFGPPSGVEA | 16 |
| 852 | 876 | LPGEDINGPLESTLATDPGPSWSPS | 25 |
| 896 | 912 | THAWAGNWTGPPDVSAL | 17 |
| 953 | 963 | LERWPGDGPAL | 11 |
| 985 | 995 | PDSAVTEGLAR | 11 |
| 1021 | 1028 | PGEQPLCL | 8 |
| 1043 | 1087 | GPKTRVPLSPREYRQYVLPGFDGCKDLARQSRGLGLGAADFVDEA | 45 |
| 1111 | 1124 | GRRPGAAGPEAGDV | 14 |
| 1151 | 1184 | VAGRSVALYASADEARNALPPIPRVMWPPGFGAA | 34 |
| 1197 | 1255 | AFGHHGGSERPAETQAGRQRRTADDREHALEPDDWEVGCEDAWDSEEGGGDDGDAPGSS | 59 |
| 1263 | 1277 | VAPGVLRDRRVGLRP | 15 |
| 1282 | 1307 | ELLSSSSSSEDEDDVWGGRGGRSPPQ | 26 |
| GP64 | 5 | 55 | SPATRGDSSESKPGASVDVNGKMEYGSAPGPLNGRDTSRGPGAFCTPGWEI | 51 |
| 76 | 82 | GRVTRDS | 7 |
| 100 | 108 | QRPTLACWE | 9 |
| 111 | 118 | LQLQPTQT | 8 |
| 130 | 243 | HRPPRGEDGFIEAPNVPLHRSALECDVSDDGGEDDSDDDGSTPSDVIEFRDSDAESSDGEDFIVEEESEESTDSCEPDGVPGDCYRDGDGCNTPSPKRPQRAIERYAGAETAEY | 114 |
| 253 | 275 | GEGGVDWKRRRHEAPRRHDIPPP | 23 |
| GP65 | 5 | 15 | GSRGEHPGGEY | 11 |
| 22 | 35 | RHDTPAHQALMNDA | 14 |
| 54 | 63 | FIHSPSERPC | 10 |
| 82 | 91 | AADRQRPPSV | 10 |
| 104 | 115 | EQCMPDPQSHLE | 12 |
| 150 | 157 | LYDRPGGI | 8 |
| 171 | 177 | LGVPRTH | 7 |
| GP66 | 5 | 10 | NTMEGE | 6 |
| 20 | 55 | VTPRAQPNNTTITAIQPSRSAEKCYYSDSENETADE | 36 |
| 59 | 71 | RIGKYQHKIYHRK | 13 |
| GP67 | 5 | 101 | DATDTFVGQGKFRGAISTSPSHIMQTCGFIQQMFPVEMSPGIESEDDPNYDVNMDIQSFNIFDGVHETEAEASVALCAEARVGINKAGFVILKTFTP | 97 |
| 232 | 239 | VDINANRY | 8 |
| 281 | 296 | SLFERDGLDGNCDSER | 16 |
| 306 | 343 | GTHPNEFPINPTSNLRRQYIGLAKRSSRKPGSRPLWTN | 38 |
| 378 | 389 | FQTLPDPYPNPM | 12 |
| GP68 | 61 | 67 | QLPTGTN | 7 |
| 92 | 98 | YDGCPRI | 7 |
| 108 | 126 | YKHSWHYGNSTDRISTEPD | 19 |
| 169 | 213 | GSHHNIHGVIYTSPSLQNGYSTRALFQQARLCDLPATPKGSGTSL | 45 |
| 216 | 270 | HMLDLRAGKSLEDNPWLHEDVVTTETKSVVKEGIENHVYPTDMSTLPEKSLNDPP | 55 |
| 301 | 326 | RIKKHPIYRPNTKTRRGIQNATPESD | 26 |
| 337 | 350 | ATIREESPPHSVVN | 14 |
| GP69 | 67 | 167 | RASVLRYDDFHIDEDKLDTNSVYEPYYHSDHAESSWVNRGESSRKAYDHNSPYIWPRNDYDGFLENAHEHHGVYNQGRGIDSGERLMQPTQMSAQEDLGDD | 101 |
| 178 | 209 | GDDRHKIVNVDQRQYGDVFKGDLNPKPQGQRL | 32 |
| 225 | 233 | PIQRIYGVR | 9 |
| 246 | 253 | CTGDAAPA | 8 |
| 274 | 282 | CAENTKEDQ | 9 |
| 289 | 298 | RFQGKKEADQ | 10 |
| 308 | 322 | LFDELELDPPEIEPG | 15 |
| 360 | 376 | DEKTRNPTPAVTPQPRG | 17 |
| 438 | 450 | PNAPQCLSHMNSG | 13 |
| 468 | 498 | QNCEHADNYTAYCLGISHMEPSFGLILHDGG | 31 |
| 542 | 572 | IEERGFPPTAGQPPATTKPKEITPVNPGTSP | 31 |
| 607 | 618 | YRVDKSPYNQSM | 12 |
| 625 | 651 | VDDFEDSESTDTEEEFGNAIGGSHGGS | 27 |
| GP70 | 5 | 15 | GSRGEHPGGEY | 11 |
| 22 | 35 | RHDTPAHQALMNDA | 14 |
| 54 | 63 | FIHSPSERPC | 10 |
| 82 | 91 | AADRQRPPSV | 10 |
| 104 | 115 | EQCMPDPQSHLE | 12 |
| 150 | 157 | LYDRPGGI | 8 |
| 171 | 177 | LGVPRTH | 7 |
| GP71 | 5 | 55 | SPATRGDSSESKPGASVDVNGKMEYGSAPGPLNGRDTSRGPGAFCTPGWEI | 51 |
| 76 | 82 | GRVTRDS | 7 |
| 100 | 108 | QRPTLACWE | 9 |
| 111 | 118 | LQLQPTQT | 8 |
| 130 | 243 | HRPPRGEDGFIEAPNVPLHRSALECDVSDDGGEDDSDDDGSTPSDVIEFRDSDAESSDGEDFIVEEESEESTDSCEPDGVPGDCYRDGDGCNTPSPKRPQRAIERYAGAETAEY | 114 |
| 253 | 275 | GEGGVDWKRRRHEAPRRHDIPPP | 23 |
| GP72 | 5 | 525 | PMQRSTPQRAGSPDTLELMDLLDAAAAAAEHRARVVTSSQPDDLLFGENGVMVGREHEIVSIPSVSGLQPEPRTEDVGEELTQDDYVCEDGQDLTGSPVIPLAEVFHTRFSEAGAREPTGADRSLETVSLGTKLARSPKPPMNDGETGRGTTPPFPQAFSPVSPASPVGDAAGNDQREDQRSIPRQTTRGNSPGLPSVVHRDRQTRSISGKKPGDEQAGHAHASGDGVVLQKTQRPAQGKSPKKKTLKVKVPLPARKPGGPVPGPVEQLYHVLSDSVPAKGAKADLPFETDDTRPRKHDARGITPRVPGRSSGGKPRAFLALPGRSHAPDPIEDDSPVEKKPKSREFVSSSSSSSSWGSSSEDEDDEPRRVSVGSETTGSRSGREHAPSPSNSDDSDSNDGGSTKQNIQPGYRSISGPDPRIRKTKRLAGEPGRQRQKSFSLPRSRTPIIPPVSGPLMMPDGSPWPGSAPLPSNRVRFGPSGETREGHWEDEAVRAARARYEASTEPAPLYVPELGDPARQ | 521 |
| 535 | 555 | CPDRDPIAWLQNPKLTGVNSA | 21 |
| 561 | 592 | QKLLPPGRAGTAVTGSVASPVPHVGEAMATGE | 32 |
| 607 | 617 | SRRYDRAQKHF | 11 |
| 627 | 797 | AGMAYPEATGSSPAARISRGHPSPTTPATQTPDPQPSAAARSLSVCPPDDRLRTPRKRKSQPVESRSLLDKIRETPVADARVADDHVVSKAKRRVSEPVTITSGPVVDPPAVITMPLDGPAPNGGFRRIPRGALHTPVPSDQARKAYCTPETIARLVDDPLFPTAWRPALS | 171 |
| 811 | 826 | PGGGDRRFGPPSGVEA | 16 |
| 852 | 876 | LPGEDINGPLESTLATDPGPSWSPS | 25 |
| 896 | 912 | THAWAGNWTGPPDVSAL | 17 |
| 953 | 963 | LERWPGDGPAL | 11 |
| 985 | 995 | PDSAVTEGLAR | 11 |
| 1021 | 1028 | PGEQPLCL | 8 |
| 1043 | 1087 | GPKTRVPLSPREYRQYVLPGFDGCKDLARQSRGLGLGAADFVDEA | 45 |
| 1111 | 1124 | GRRPGAAGPEAGDV | 14 |
| 1151 | 1184 | VAGRSVALYASADEARNALPPIPRVMWPPGFGAA | 34 |
| 1197 | 1255 | AFGHHGGSERPAETQAGRQRRTADDREHALEPDDWEVGCEDAWDSEEGGGDDGDAPGSS | 59 |
| 1263 | 1277 | VAPGVLRDRRVGLRP | 15 |
| 1282 | 1307 | ELLSSSSSSEDEDDVWGGRGGRSPPQ | 26 |

The core similar sequences are marked with the red color. To facilitate alignment, some short epitope sequences are filled up to at least 15 aa by adding flanking sequences and marked with the blue color.

**Extended Data Table 6 | Epitopes of poliovirus.**

| **Protein** | **Start** | **End** | **Epitope** | **Length** |
| --- | --- | --- | --- | --- |
| 3CD | 80 | 97 | NEKFRDIRPHIPTQITET | 18 |
| 122 | 131 | QGYLNLGGRQ | 10 |
| 179 | 255 | FTQSQGEIQWMRPSKEVGYPIINAPSKTKLEPSAFHYVFEGVKEPAVLTKNDPRLKTDFEEAIFSKYVGNKITEVDE | 77 |
| 270 | 282 | SLDINTEQMCLED | 13 |
| 287 | 298 | TDGLEALDLSTS | 12 |
| 302 | 331 | PYVAMGKKKRDILNKQTRDTKEMQKLLDTY | 30 |
| 344 | 353 | ELRSKTKVEQ | 10 |
| 538 | 550 | TPADKSATFETVT | 13 |
| 587 | 593 | TKDPRNT | 7 |
| 609 | 613 | EEEYN | 5 |
| 627 | 636 | ALLLPEYSTL | 10 |
| 3D | 5 | 22 | WMRPSKEVGYPIINAPSK | 18 |
| 31 | 72 | HYVFEGVKEPAVLTKNDPRLKTDFEEAIFSKYVGNKITEVDE | 42 |
| 87 | 102 | SLDINTEQMCLEDAMY | 16 |
| 104 | 115 | TDGLEALDLSTS | 12 |
| 119 | 148 | PYVAMGKKKRDILNKQTRDTKEMQKLLDTY | 30 |
| 160 | 170 | DELRSKTKVEQ | 11 |
| 200 | 206 | KNPGVIT | 7 |
| 354 | 367 | MTPADKSATFETVT | 14 |
| 403 | 411 | WTKDPRNTQ | 9 |
| 441 | 456 | IGRALLLPEYSTLYRR | 16 |
| 3C | 53 | 65 | EVEILDAKALEDQ | 13 |
| 80 | 97 | NEKFRDIRPHIPTQITET | 18 |
| 121 | 134 | EQGYLNLGGRQTARTLMYNFPTRAGQCG | 14 |
| 3AB | 10 | 17 | IDIKTSPP | 8 |
| 29 | 36 | DSQEVRDY | 8 |
| 42 | 57 | WIVNITSQVQTERNIN | 16 |
| 89 | 105 | AYTGLPNKKPNVPTIRTAK | 17 |
| 3B | 6 | 18 | LPNKKPNVPTIRTAK | 13 |
| 3A | 28 | 38 | VDSQEVRDYCE | 11 |
| 42 | 57 | WIVNITSQVQTERNIN | 16 |
| 2BC | 19 | 39 | QQISDKITELTNMVTSTITEK | 21 |
| 90 | 103 | EIPYVIKQGDSWLK | 14 |
| 134 | 200 | IPQARDKLEFVTKLRQLEMLENQISTIHQSCPSQEHQEILFNNVRWLSIQSKRFAPLYAVEAKRIQK | 67 |
| 206 | 216 | NNYIQFKSKHR | 11 |
| 258 | 266 | PSHFDGYKQ | 9 |
| 279 | 288 | PDGADMKLFC | 10 |
| 301 | 310 | ASLEEKGILF | 10 |
| 323 | 337 | STNSSRISPPTVAHSDALAR | 15 |
| 348 | 374 | MNEYSRDGKLNMAMATEMCKNCHQPAN | 27 |
| 395 | 402 | RVRYSIDQ | 8 |
| 408 | 418 | INERNRRSNIG | 11 |
| 2C | 39 | 103 | QARDKLEFVTKLRQLEMLENQISTIHQSCPSQEHQEILFNNVRWLSIQSKRFAPLYAVEAKRIQK | 65 |
| 109 | 119 | NNYIQFKSKHR | 11 |
| 161 | 169 | PSHFDGYKQ | 9 |
| 182 | 190 | PDGADMKLF | 9 |
| 205 | 213 | SLEEKGILF | 9 |
| 227 | 240 | STNSSRISPPTVAHSDALAR | 14 |
| 250 | 277 | VMNEYSRDGKLNMAMATEMCKNCHQPAN | 28 |
| 295 | 305 | KSSRVRYSIDQ | 11 |
| 311 | 320 | INERNRRSNI | 10 |
| 2B | 19 | 27 | QQISDKITE | 9 |
| 2A | 22 | 30 | ATQDDLQNA | 9 |
| 45 | 54 | RAQGTDSIAR | 10 |
| 81 | 93 | QYMEANNYYPARY | 13 |
| 139 | 145 | LYAYEEE | 7 |
| VP1 | 19 | 74 | GAATSRDALPNTEASGPTHSKEIPALTAVETGATNPLVPSDTVQTRHVVQHRSRSE | 56 |
| 95 | 106 | PASTTNKDKLFA | 12 |
| 143 | 150 | TETNNGHA | 8 |
| 165 | 178 | PVPEKWDDYTWQTS | 14 |
| 212 | 227 | FSKVPLKDQSAALGDS | 16 |
| 247 | 252 | VRVVNDHNPTKVTSK | 6 |
| 276 | 299 | AVAYYGPGVDYKDGTLTPLSTKDL | 24 |
| VP2 | 6 | 15 | ACGYSDRVLQ | 10 |
| 38 | 59 | WPEYLRDSEANPVDQPTEPDVA | 22 |
| 69 | 86 | VSWTKESRGWWWKLPDAL | 18 |
| 133 | 182 | AGDSNTTTMHTSYQNANPGEKGGTFTGTFTPDNNQTSPARRFCPVDYLLG | 50 |
| 261 | 268 | NGLRNITL | 8 |
| VP3 | 5 | 38 | MNTPGSNQYLTADNFQSPCALPEFDVTPPIDIPG | 34 |
| 54 | 65 | PFDLSATKKNTM | 12 |
| 72 | 79 | LSDKPHTD | 8 |
| 138 | 149 | GADPPKKRKEAM | 12 |
| 177 | 184 | RQTIDDSF | 8 |
| 227 | 235 | DTTHIEQKA | 9 |
| VP4 | 5 | 22 | SSQKVGAHENSNRAYGGS | 18 |
| 29 | 54 | INYYRDSASNAASKQDFSQDPSKFTE | 26 |

The core similar sequences are marked with the red color. To facilitate alignment, some short epitope sequences are filled up to at least 15 aa by adding flanking sequences and marked with the blue color.

**Extended Data Table 7 | Epitopes of human papillomavirus types 16 & 18.**

| **Protein** | **Start** | **End** | **Epitope** | **Length** |
| --- | --- | --- | --- | --- |
| HPV type 16 L1 | 10 | 28 | TVYLPPVPVSKVVSTDEYV | 19 |
| 77 | 95 | FRIHLPDPNKFGFPDTSFYNPDT (ver. 1.0) | 19 |
| 123 | 143 | LNKLDDTENASAYAANAGVDN | 21 |
| 213 | 220 | LQANKSEV | 8 |
| 234 | 243 | YIKMVSEPYG | 10 |
| 276 | 301 | YIKGSGSTANLASSNYFPTPSGSMVTSDAQI (ver. 1.0) | 26 |
| 350 | 369 | TSETTYKNTNFKEYLRHGEE | 20 |
| 396 | 423 | STILEDWNFGLQPPPGGTLEDTYRFVTS | 28 |
| 426 | 444 | IACQKHTPPAPKEDPLKKY | 19 |
| 452 | 462 | KEKFSADLDQF | 11 |
| 473 | 502 | GLKAKPKFTLGKRKATPTTSSTSTTAKRKK | 30 |
| HPV type 18 L1 | 71 | 89 | TVYLPPPSVARVVNTDDYV | 19 |
| 139 | 157 | FRVQLPDPNKFGLPDNSIYNPET (ver. 1.0) | 19 |
| 184 | 205 | YNKLDDTESSHAATSNVSEDVR | 22 |
| 227 | 244 | GEHWAKGTACKSRPLSQG | 18 |
| 273 | 280 | TLQDTKCE | 8 |
| 294 | 303 | DYLQMSADPY | 10 |
| 343 | 363 | GMRASPGSCVYSPSPSGSIVTSDSQL (ver. 1.0) | 21 |
| 412 | 431 | STQSPVPGQYDATKFKQYSRHVEE | 20 |
| 458 | 506 | SSILEDWNFGVPPPPTTSLVDTYRFVQSVAITCQKDAAPAENKDPYDKL | 49 |
| 514 | 524 | TEKFSLDLDQY | 11 |
| 535 | 564 | GLRRKPTIGPRKRSAPSATTSSKPAKRVRV | 30 |
| E1^E4 | 16 | 68 | LGSTWPTTPPRPIPKPSPWAPKKHRRLSSDQDQSQTPETPATPLSCCTETQWT | 53 |
| E1 | 5 | 14 | AGTNGEEGTG | 10 |
| 26 | 67 | EKKTGDAISDDENENDSDTGEDLVDFIVNDNDYLTQAETETA | 42 |
| 76 | 193 | AKQHRDAVQVLKRKYLGSPLSDISGCVDNNISPRLKAICIEKQSRAAKRRLFESEDSGYGNTEVETQQMLQVEGRHETETPCSQYSGGSGGGCSQYSSGSGGEGVSERHTICQTPLTN | 118 |
| 224 | 232 | RPFKSNKST | 9 |
| 328 | 340 | NISEVYGDTPEWI | 13 |
| 345 | 356 | VLQHSFNDCTFE | 12 |
| 394 | 400 | KSNSQAK | 7 |
| 414 | 421 | RAEKKQMS | 8 |
| 548 | 556 | DVKHRPLVQ | 9 |
| 571 | 578 | GTDSRWPY | 8 |
| 591 | 608 | EFPFDENGNPVYELNDKN | 18 |
| 620 | 636 | LSLHEDEDKENDGDSLP | 17 |
| 640 | 646 | CVSGQNT | 7 |
| E2 | 16 | 31 | LTHYENDSTDLRDHID | 16 |
| 85 | 93 | SQYSNEKWT | 9 |
| 196 | 284 | PTSVFSSNEVSSPEIIRQHLANHPAATHTKAVALGTEETQTTIQRPRSEPDTGNPCHTTKLLHRDSVDSAPILTAFNSSHKGRINCNSN | 89 |
| L2 | 4 | 17 | KRSAKRTKRASATQ | 14 |
| 23 | 31 | KQAGTCPPD | 9 |
| 33 | 39 | IPKVEGK | 7 |
| 62 | 249 | TGSGTGGRTGYIPLGTRPPTATDTLAPVRPPLTVDPVGPSDPSIVSLVEETSFIDAGAPTSVPSIPPDVSGFSITTSTDTTPAILDINNTVTTVTTHNNPTFTDPSVLQPPTPAETGGHFTLSSSTISTHNYEEIPMDTFIVSTNPNTVTSSTPIPGSRPVARLGLYSRTTQQVKVVDPAFVTTPTKL | 188 |
| 255 | 299 | PAYEGIDVDNTLYFSSNDNSINIAPDPDFLDIVALHRPALTSRRT | 45 |
| 306 | 322 | IGNKQTLRTRSGKSIGA | 17 |
| 332 | 435 | TIDPAEEIELQTITPSTYTTTSHAASPTSINNGLYDIYADDFITDTSTTPVPSVPSTSLSGYIPANTTIPFGGAYNIPLVSGPDIPINITDQAPSLIPIVPGSP | 104 |
| 453 | 461 | YMLRKRRKR | 9 |
| E6 | 4 | 18 | KRTAMFQDPQERPRK | 15 |
| 42 | 52 | QQLLRREVYDF | 11 |
| 83 | 90 | YRHYCYSL | 8 |
| 116 | 127 | PLCPEEKQRHLD | 12 |
| 147 | 155 | CRSSRTRRE | 9 |
| E7 | 12 | 50 | MLDLQPETTDLYCYEQLNDSSEEEDEIDGPAGQAEPDRA | 39 |

The core similar sequences are marked with the red color. To facilitate alignment, some short epitope sequences are filled up to at least 15 aa by adding flanking sequences and marked with the blue color. "ver. 1.0" means that the epitope was calculated by the Bepipred Linear Epitope Prediction version 1.0.

**Extended Data Table 8 | Epitopes of measles virus.**

| **Protein** | **Start** | **End** | **Epitope** | **Length** |
| --- | --- | --- | --- | --- |
| N gene | 13 | 31 | RNKDKPPITSGSGGAIRGI | 19 |
| 106 | 112 | LLEVVQSDQSQSGLTFASRG | 7 |
| 119 | 161 | RGTNMEDEADQYFSHDDPSSSDQSRSGWFENKEISDIEVQDPE | 43 |
| 186 | 218 | DTAADSELRRWIKYTQQRRVVGEFRLERKWLDV | 33 |
| 242 | 249 | RTPGNKPR | 8 |
| 347 | 356 | MGGLNFGRSY | 10 |
| 370 | 379 | RRSAGKVSST | 10 |
| 385 | 392 | GITAEDAR | 8 |
| 401 | 493 | TTEDRISRAVGPRQAQVSFLHGDQSENELPGLGGKEDRRVKQGRGEARESYRETGSSRASDARAAHPPTSMPLDIDTASESGQDPQDSRRSAD | 93 |
| 505 | 522 | LEEQGSDTDTPRVYNDRD | 18 |
| P gene phospho-protein | 23 | 31 | PIGSLAVEE | 9 |
| 34 | 267 | AAWSEISDNPGQDRATCKEEEAGSSGLSKPCLSAIGSTEGGAPRIRGQGSGESDDDAETLGIPSRNLQASSTGLQCYHVYDHSGEAVKGIQDADSIMVQSGLDGDSTLSGGDDESENSDVDIGEPDTEGYAITDRGSAPISMGFRASDVETAEGGEIHELLKLQSRGNNFPKLGKTLNVPPPPNPSRASTSETPIKKGTDARLASFGTEIASLLTGGATQCARKSPSEPSGPGA | 234 |
| 270 | 316 | GNVPECVSNAALIQEWTPESGTTISPRSQNNEEGGDYYDDELFSDVQ | 47 |
| 327 | 337 | EDNQKIISKLE | 11 |
| 377 | 459 | LGKDPNDPTADVELNPDLKPIIGRDSGRALAEVLKKPVASRQLQGMTNGRTSSRGQLLKEFQLKPIGKKVSSAVGFVPDTGPA | 83 |
| 472 | 481 | RLEEDRKRYL | 10 |
| 490 | 496 | GANDLAK | 7 |
| P gene non-structural C protein | 4 | 48 | TDWNASGLSRPSPSAHWPSRKPWQHGQKYQTTQDRTEPPARKRRQ | 45 |
| 57 | 64 | ASQQLDQL | 8 |
| 81 | 99 | TTLKLWESPQEISRHQALG | 19 |
| 133 | 139 | PSQEETM | 7 |
| 168 | 183 | WGSGLLMLKLQKEGRS | 16 |
| M gene | 5 | 17 | YDFDKSAWDIKGS | 13 |
| 40 | 46 | PGLGDRK | 7 |
| 62 | 69 | SDPLGPPI | 8 |
| 118 | 129 | PLTLLTPWRKVL | 12 |
| 141 | 149 | CNAVNLIPL | 9 |
| 199 | 210 | AIGPGKIIDNAE | 12 |
| 226 | 236 | RKKSEVYSADY | 11 |
| 312 | 320 | SVPQEFRIY | 9 |
| F gene | 22 | 30 | TGQIHWGNL | 9 |
| 62 | 79 | ITLLNNCTRVEIAEYRRL | 18 |
| 96 | 110 | QNIRPVQSVASSRRH | 15 |
| 218 | 227 | GPSLRDPISA | 10 |
| 243 | 255 | NKVLEKLGYSGGDLLGILESRG | 13 |
| 326 | 336 | ISNFDESSCTF | 11 |
| 342 | 352 | VCSQNALYPMS | 11 |
| 360 | 376 | RGSTKSCARTLVSGSFGNRFILSQG | 17 |
| 435 | 441 | RRYPDAV | 7 |
| 444 | 461 | HRIDLGPPISLERLDVGT | 18 |
| 475 | 486 | EDAKELLESSDQILRSMKGL | 12 |
| 522 | 547 | NKKGEQVGMSRPGLKPDLTGTSKSYV | 26 |
| H gene | 5 | 20 | RDRINAFYKDNPHPKG | 16 |
| 73 | 86 | SLSTNLDVTNSIEH | 14 |
| 102 | 113 | EVGLRTPQRFTD | 12 |
| 123 | 134 | KFLNPDREYDFR | 12 |
| 172 | 191 | LEARATNQFLAVSKGNCSGP | 20 |
| 237 | 250 | PNLSSKGSELSQLSMHRVFEVG | 14 |
| 277 | 283 | EQPVSND | 7 |
| 309 | 317 | PYQGSGKGV | 9 |
| 329 | 345 | SPTDMRSWVPLSTDDPV | 17 |
| 371 | 380 | RTDDKLRMET | 10 |
| 387 | 402 | KGKNQALCENPEWAPL | 16 |
| 440 | 450 | GMDLYKTNHNN | 11 |
| 589 | 596 | ESGGHITH | 8 |
| L gene | 5 | 14 | SVNQILYPEV | 10 |
| 32 | 66 | ARVPHAYSLEDPTLCQNIKHRLKNGFSNQMIINNV | 35 |
| 73 | 87 | KSKLRSYPAHSHIPY | 15 |
| 98 | 104 | EDKESTR | 7 |
| 130 | 144 | QCLRDTNSRLGLGSELREDIKEK | 15 |
| 154 | 161 | VYMHSSQW | 8 |
| 178 | 193 | VIKSQTHTCHRRRHTP | 16 |
| 250 | 256 | RYAELLG | 7 |
| 294 | 303 | RDITVELRGA | 10 |
| 315 | 326 | VLDQNGFSDEGT | 12 |
| 373 | 382 | YMNQPKVIVY | 10 |
| 401 | 419 | RDRHGGSWPPLTLPLHAAD | 19 |
| 428 | 443 | GEGLTHEQCVDNWKSF | 16 |
| 453 | 460 | PLSLDSDL | 8 |
| 468 | 495 | ALAALQREWDSVYPKEFLRYDPPKGTGS | 28 |
| 507 | 513 | SFDPYDM | 7 |
| 533 | 541 | SLKEKEIKE | 9 |
| 570 | 583 | KYFKDNGMAKDEHD | 14 |
| 589 | 652 | HTLAVSGVPKDLKESHRGGPVLKTYSRSPVHTSTRNVKAEKGFVGFPHVIRQNQDTDHPENIET | 64 |
| 713 | 726 | PPDLDAHVPLCKVP | 14 |
| 785 | 797 | STWPYNLKKREAA | 13 |
| 812 | 820 | HDIGHHLKA | 9 |
| 906 | 923 | FTINSTMTRDVVIPLLTN | 18 |
| 983 | 1008 | TLHQVMTQQPGDSSFLDWASDPYSANLVCVQS | 26 |
| 1038 | 1044 | SKEEDER | 7 |
| 1089 | 1099 | SMRKGGLTSRV | 11 |
| 1105 | 1110 | NYDYEQ | 6 |
| 1119 | 1132 | TGRKRNVLIDKESC | 14 |
| 1145 | 1151 | WARLARG | 7 |
| 1169 | 1182 | HLIRRHETCVICEC | 14 |
| 1197 | 1233 | QLDDIDKETSSLRVPYIGSTTDERTDMKLAFVRAPSR | 37 |
| 1268 | 1302 | NVSLEELRVITPISTSTNLAHRLRDRSTQVKYSGT | 35 |
| 1319 | 1327 | SFVISDKKV | 9 |
| 1350 | 1358 | LEKDTGSSN | 9 |
| 1375 | 1395 | IDHPRIPSSRKLELRAELCTN | 21 |
| 1400 | 1430 | DNAPLIDRDATRLYTQSHRRHLVEFVTWSTP | 31 |
| 1450 | 1459 | KFEKDHMNEI | 10 |
| 1463 | 1469 | IGDDDIN | 7 |
| 1500 | 1507 | HYHRPSGK | 8 |
| 1546 | 1560 | GIIEPIHGPSLDAQN | 15 |
| 1595 | 1603 | SDEDVVPDR | 9 |
| 1623 | 1633 | GTCPPIRGLRP | 11 |
| 1647 | 1667 | EARLSPAGSSWNINPIIVDHY | 21 |
| 1680 | 1690 | KQIRLRVDPGF | 11 |
| 1695 | 1753 | LAEVNVSQPKVGSNNISNMSIKDFRPPHDDVAKLLKDINTSKHNLPISGGSLANYEIHA | 59 |
| 1774 | 1780 | IRRCLEP | 7 |
| 1814 | 1828 | YNSGVSANSRSGQRELAPYP | 15 |
| 1833 | 1841 | LVEHRMGVG | 9 |
| 1851 | 1859 | RPEVTWVGS | 9 |
| 1885 | 1892 | LPNKDTIE | 8 |
| 1975 | 2024 | QQIIESSVRTSPGLIGHILSIKQLSCIQAIVGGAVSRGDINPILKKLTPI | 50 |
| 2034 | 2052 | AINGPKLCKELIHHDVASG | 19 |
| 2071 | 2092 | KDNQRSQQGMFHAYPVLVSSRQRELVSR | 22 |
| 2113 | 2119 | NRKLINR | 7 |
| 2148 | 2156 | QIIMTGGLK | 9 |

The core similar sequences are marked with the red color. To facilitate alignment, some short epitope sequences are filled up to at least 15 aa by adding flanking sequences and marked with the blue color.

**Extended Data Table 9 | Epitopes of hepatitis B virus.**

| **Protein** | **Start** | **End** | **Epitope** | **Length** |
| --- | --- | --- | --- | --- |
| HBVgp1 | 5 | 87 | YQHFRRLLLLDDEAGPLEEELPRLADEGLNRRVAEDLNLGNLNVSIPWTHKVGNFTGLYSSTVPVFNPHWKTPSFPNIHLHQD | 83 |
| 92 | 107 | CEQFVGPLTVNEKRRL | 16 |
| 116 | 135 | YPKVTKYLPLDKGIKPYYPE | 20 |
| 157 | 310 | LYKRETTHSASFCGSPYSWEQDLQHGAESFHQQSSGILSRPPVGSSLQSKHRKSRLGLQSQQGHLARRQQGRSWSIRAGFHPTARRPFGVEPSGSGHTTNFASKSASCLHQSPVRKAAYPAVSTFEKHSSSGHAVEFHNLPPNSARSQSERPVF | 154 |
| 313 | 325 | WWLQFRNSKPCSD | 13 |
| 336 | 357 | EDWGPCAEHGEHHIRIPRTPSR | 22 |
| 365 | 403 | VDKNPHNTAESRLVVDFSQFSRGNYRVSWPKFAVPNLQS | 39 |
| 436 | 449 | LLVGSSGLSRYVARLSSNSRILNNQ | 14 |
| 451 | 472 | SSNSRILNNQHGTMPDLHDYCS | 22 |
| 480 | 489 | LLLYQTFGRK | 10 |
| 573 | 580 | NKTKRWGY | 8 |
| 605 | 619 | KECFRKLPINRPIDW | 15 |
| 655 | 661 | AFTFSPT | 7 |
| 670 | 682 | YLNLYPVARQRPG | 13 |
| 705 | 715 | RGTFSAPLPIH | 11 |
| 771 | 829 | SALNPADDPSRGRLGLSRPLLRLPFRPTTGRTSLYADSPSVPSHLPDRVHFASPLHVAW | 59 |
| HBVgp2 L | 4 | 166 | NLSTSNPLGFFPDHQLDPAFRANTANPDWDFNPNKDTWPDANKVGAGAFGLGFTPPHGGLLGWSPQAQGILQTLPANPPPASTNRQSGRQPTPLSPPLRNTHPQAMQWNSTTFHQTLQDPRVRGLYFPAGGSSSGTVNPVLTTASPLSSIFSRIGDPALNMEN | 163 |
| 199 | 228 | WTSLNFLGGTTVCLGQNSQSPTSNHSPTSC | 30 |
| 270 | 298 | CPLIPGSSTTSTGPCRTCMTTAQGTSMYP | 29 |
| HBVgp2 M | 7 | 59 | TFHQTLQDPRVRGLYFPAGGSSSGTVNPVLTTASPLSSIFSRIGDPALNMENI | 53 |
| 86 | 126 | SLDSWWTSLNFLGGTTVCLGQNSQSPTSNHSPTSCPPTCPG | 41 |
| 162 | 190 | CPLIPGSSTTSTGPCRTCMTTAQGTSMYP | 29 |
| HBVgp2 S | 33 | 66 | DSWWTSLNFLGGTTVCLGQNSQSPTSNHSPTSCP | 34 |
| 109 | 121 | CPLIPGSSTTSTGPCRTCMTTAQGTS | 13 |
| 126 | 134 | TTAQGTSMY | 9 |
| HBVgp3 | 21 | 57 | VGAESCGRPFSGSLGTLSSPSPSAVPTDHGAHLSLRG | 37 |
| 77 | 110 | RRMETTVNAHQILPKVLHKRTLGLSAMSTTDLEA | 34 |
| 118 | 127 | KDWEELGEEI | 10 |
| HBVgp4 PreC | 31 | 43 | DIDPYKEFGATVE | 13 |
| 68 | 79 | REALESPEHCSP | 12 |
| 102 | 111 | GVNLEDPASR | 10 |
| 118 | 129 | VNTNMGLKFRQL | 12 |
| 137 | 145 | LTFGRETVI | 9 |
| 157 | 168 | TPPAYRPPNAPI | 12 |
| 173 | 209 | PETTVVRRRGRSPRRRTPSPRRRRSQSPRRRRSQSRE | 37 |
| HBVgp4 C protein | 4 | 14 | DPYKEFGATVE | 11 |
| 39 | 54 | REALESPEHCSPHHTA | 16 |
| 73 | 83 | GVNLEDPASRD | 11 |
| 88 | 99 | YVNTNMGLKFRQ | 12 |
| 127 | 139 | RTPPAYRPPNAPI | 13 |
| 146 | 180 | TTVVRRRGRSPRRRTPSPRRRRSQSPRRRRSQSRE | 35 |

The core similar sequences are marked with the red color. To facilitate alignment, some short epitope sequences are filled up to at least 15 aa by adding flanking sequences and marked with the blue color.

**Extended Data Table 10 | Epitopes of human immunodeficiency virus.**

| **Protein** | **Start** | **End** | **Epitope** | **Length** |
| --- | --- | --- | --- | --- |
| GAG | 7 | 30 | VLRGSKLDSWEQIRLKPGSKKKYR | 24 |
| 45 | 59 | ACNPELLETAEGNEK | 15 |
| 66 | 73 | PALKTGSD | 8 |
| 92 | 150 | FRINDTQQAIQKLKEVMNKKSASAAKEDTSERQTGQNYPIIPNAQGQMVHQAISPRTLN | 59 |
| 204 | 255 | EEASDWDRTHPPAAGPYPAGQIRDPTGSDIAGTTSTQQEQIHWTTRANNPIP | 52 |
| 272 | 290 | VKMYSPVSILDIKQGPKEP | 19 |
| 305 | 314 | EQATQEVKNW | 10 |
| 325 | 394 | NPDCKQILKALGPGASLEEMMVACQGVGGPTHKARVLAEAMATAQQDLKGGYTSVFMQRGQNPVKRGPVK | 70 |
| 400 | 493 | KEGHIAKNCRSPRRKGCWKCGQEGHQMKDCKNGRQANFLGKYWPPGGTRPGNYVQKQVHPSAPPMEEEVQKQENQEQKGDPNELYPFASLKSLF | 94 |
| POL | 4 | 59 | QILASGGHEARQLCAETSAPLSPTDGGGSAETRESGTEGGPKRALSVCLPQIPLWD | 56 |
| 85 | 96 | LNNIQLEGEWTP | 12 |
| 147 | 156 | CTLNFPISPI | 10 |
| 167 | 184 | MDGPKVKQWPLSKEKIEA | 18 |
| 197 | 205 | KISRIGPEN | 9 |
| 236 | 242 | QDFWEVQ | 7 |
| 284 | 291 | PSLNNETP | 8 |
| 345 | 351 | PLTEHRK | 7 |
| 365 | 383 | FYTPDKKHQKEPPFLWMGY | 19 |
| 392 | 406 | VQPIQLPDKEVWTVN | 15 |
| 436 | 443 | GTKSLTEV | 8 |
| 504 | 515 | KYARQKSSHTND | 12 |
| 539 | 628 | KFKLPVTRETWESWWADYWQATWIPEWEFVSTPPLIKLWYRLESEPIPGAETYYVDGAANRDTKLGKAGYVTEQGKQKIVKLEETTNQKA | 90 |
| 638 | 652 | QDSKETVNIVTDSQY | 15 |
| 657 | 670 | ISSQPTQSESPIVQ | 14 |
| 680 | 708 | DKVYLTWVPAHKGIGGNEKIDKLVSKDIR | 29 |
| 713 | 727 | LEGIDQAQEDHEKYH | 15 |
| 752 | 779 | PKCQIKGEAIHGQVDYSPGIWQMDCTHL | 28 |
| 855 | 861 | NPQSQGV | 7 |
| 898 | 905 | RKGGIGGY | 8 |
| 911 | 953 | IIDILASHIQTTELQKQILKIQNFRVYYRDSRDPIWKGPAQLL | 43 |
| 967 | 1006 | DIKVVPRRKAKIIRDYGKQMAGSDSVASGQTESENMEQPG | 40 |
| VIF | 29 | 37 | KYRSRKAKE | 9 |
| 74 | 81 | PGERDEHL | 8 |
| 130 | 141 | LVKCEFPAGHSQ | 12 |
| 155 | 189 | KAKRNKPPLPSVQKLTEDKWSKHLMIRDHLESHSM | 35 |
| VPR | 4 | 16 | APNDQGPPREPFN | 13 |
| 78 | 98 | HSRIGINPTNPRGRGRRNGSSRS | 21 |
| TAT | 5 | 16 | HHPGSQPQTPCN | 12 |
| 37 | 88 | GISYGRKKRRRRPAVGASRPDNKAFVPEQPTAITDRKQKRQEEQEKEVEKKA | 52 |
| REV | 5 | 12 | SDADDQQL | 8 |
| 23 | 50 | YQSNPQPSPIGSRNARKNRRRRWRRRQVQIDSLAT | 28 |
| 64 | 101 | VHGPQDNSCVELPSLEHLSIGDSEGDQPSETWTVDPRR | 38 |
| VPU | 34 | 45 | QCLDHKKQDRREREILERVRRLR | 12 |
| 51 | 81 | REIKDDSDYESNGEEEQEVMDLVHSHGFYNP | 31 |
| ENV | 60 | 67 | NLTSPEKH | 8 |
| 80 | 100 | PTPQEYPLKNVTDKFDIWKNY | 21 |
| 134 | 153 | DPNNNTSKSNITENDGETPM | 20 |
| 165 | 176 | KEKKEEKKQALF | 12 |
| 183 | 189 | KLDNNGT | 7 |
| 203 | 213 | TIKQACPKVSF | 11 |
| 233 | 248 | QTEFNGTGTCRNITVV | 16 |
| 304 | 312 | DNVTVGQVG | 9 |
| 326 | 332 | EGRGNNS | 7 |
| 353 | 377 | ERYLELVNNSQLVTVQFNRSTDGDA | 25 |
| 402 | 427 | TFNCSRSNNCTLIKNNCTINSTSNST | 26 |
| 446 | 454 | SGLYAPPIK | 9 |
| 472 | 529 | KPWNISNRNITLRPTGGDMKDIWRTELFQYKVVKVKPFSVAPTKIARPVIGTGTHREK | 58 |
| 627 | 660 | VQWNKTWVNKTNTDLENIWGNLTWQEWDRQIDNI | 34 |
| 673 | 692 | VQQEQNEKKLLELDEWASIW | 20 |
| 731 | 773 | RQGYQPLSFQTHSHHRSEAETPGRTGEGGGEEGRSRLTASPQG | 43 |
| NEF | 4 | 15 | VLGKDKFGGWPA | 12 |
| 21 | 92 | GWPAVRERMRRTRTSPESEPPAAGVGAVSRAIAEKGGIPNSYTPQNNEALAFLDSHQEEEVGFPVRPQVPLRPMTFKGAHD | 72 |
| 94 | 113 | SVFLKEKGGLEGLIYSHARA | 20 |
| 125 | 142 | GFFPDWQHYTPGPGTRFP | 18 |
| 156 | 168 | EDEAKRLGNECVR | 13 |
| 178 | 186 | HGFEDPHGE | 9 |
| 196 | 209 | LGLTHVSKVIHPEL | 14 |

The core similar sequences are marked with the red color. To facilitate alignment, some short epitope sequences are filled up to at least 15 aa by adding flanking sequences and marked with the blue color.

**Extended Data Table 11 | Epitopes of influenza A virus H1N1.**

| **Protein** | **Start** | **End** | **Epitope** | **Length** |
| --- | --- | --- | --- | --- |
| PB2 | 11 | 46 | MSQSRTREILTKTTVDHMAIIKKYTSGRQEKNPALR | 36 |
| 56 | 87 | PITADKRIMDMIPERNEQGQTLWSKTNDAGSD | 32 |
| 100 | 130 | NRNGPTTSTVHYPKVYKTYFEKVERLKHGTF | 31 |
| 135 | 157 | FRNQVKIRRRVDTNPGHADLSAK | 23 |
| 172 | 197 | VGARILTSESQLAITKEKKEELQDCK | 26 |
| 212 | 218 | VRKTRFL | 7 |
| 239 | 257 | CWEQMYTPGGEVRNDDVDQ | 19 |
| 285 | 293 | HSTQIGGVR | 9 |
| 316 | 340 | CKAAIGLRISSSFSFGGFTFKRTSGSSVKKE | 26 |
| 421 | 430 | VNRANQRLNP | 10 |
| 447 | 457 | QNWGIESIDNV | 11 |
| 465 | 475 | PDMTPSTEMSL | 11 |
| 482 | 491 | KMGVDEYSST | 10 |
| 502 | 510 | LRVRDQRGN | 9 |
| 516 | 524 | EEVSETQGT | 9 |
| 559 | 591 | IVKIQWSQDPTMLYNKMEFEPFQSLVPKATRSR | 33 |
| 604 | 612 | RDVLGTFDT | 9 |
| 626 | 634 | PEQSRMQFS | 9 |
| 654 | 660 | PVFNYNK | 7 |
| 673 | 685 | GALTEDPDEGTSG | 13 |
| 699 | 718 | KEDKRYGPALSINELSNLAK | 20 |
| 732 | 755 | VLVMKRKRDSSILTDSQTATKRIR | 24 |
| PB1 | 15 | 38 | QNAISTTFPYTGDPPYSHGTGTGY | 24 |
| 44 | 83 | NRTHQYSEKGKWTTNTETGAPQLNPIDGPLPEDNEPSGYA | 40 |
| 117 | 138 | TRVDKLTQGRQTYDWTLNRNQP | 22 |
| 152 | 162 | SNGLTANESGR | 11 |
| 174 | 214 | MNKEEIEITTHFQRKRRVRDNMTKKMVTQRTIGKKKQRLNK | 41 |
| 231 | 243 | AERGKLKRRAIAT | 13 |
| 264 | 284 | EKLEQSGLPVGGNEKKAKLAN | 21 |
| 287 | 296 | RKMMTNSQDT | 10 |
| 305 | 313 | DNTKWNENQ | 9 |
| 349 | 365 | ARLGKGYMFESKRMKIR | 17 |
| 370 | 392 | AEMLASIDLKYFNESTKKKIEKI | 23 |
| 429 | 443 | KKYTKTIYWWDGLQS | 15 |
| 477 | 487 | MSKKKSYINKT | 11 |
| 506 | 520 | SMELPSFGVSGVNES | 15 |
| 563 | 574 | RGDTQIQTRRSF | 12 |
| 594 | 606 | GGPNLYNIRNLHI | 13 |
| 611 | 690 | LKWELMDDDYRGRLCNPLNPFVSHKEIDSVNNAVVMPAHGPAKSMEYDAVATTHSWIPKRNRSILNTSQRGILEDEQMYQ | 80 |
| 700 | 711 | NLFEKFFPSSSYRRPVGI | 12 |
| 725 | 742 | DARVDFESGRIKKEEFSE | 18 |
| PA | 22 | 31 | KEYGEDPKIE | 10 |
| 52 | 73 | HFIDERGESIIVESGDPNALLK | 22 |
| 105 | 114 | FLPDLYDYKE | 10 |
| 125 | 140 | REVHIYYLEKANKIKS | 16 |
| 152 | 168 | GEEMATKADYTLDEESR | 17 |
| 185 | 277 | RSLWDSFRQSERGEETIEEKFEITGTMRKLADQSLPPNFSSLENFRAYVDGFEPNGCIEGKLSQMSKEVNAKIEPFLRTTPRPLRLPDGPLCH | 93 |
| 290 | 302 | LSIEDPSHEGEGI | 13 |
| 315 | 335 | FGWKEPNIVKPHEKGINPNYL | 21 |
| 347 | 366 | DIENEEKIPRTKNMKRTSQL | 20 |
| 368 | 405 | WALGENMAPEKVDFDDCKDVGDLKQYDSDEPEPRSLAS | 38 |
| 416 | 437 | ELTDSSWIELDEIGEDVAPIEH | 22 |
| 490 | 497 | RTKEGRRK | 8 |
| 529 | 536 | DPRLEPHK | 8 |
| 601 | 631 | SVKEKDMTKEFFENKSETWPIGESPRGVEEG | 31 |
| 653 | 661 | PQLEGFSAE | 9 |
| 674 | 685 | DNLEPGTFDLGG | 12 |
| HA | 41 | 67 | VTVTHSVNLLEDKHNGKLCKLRGVAPL | 27 |
| 81 | 91 | NPECESLSTAS | 11 |
| 114 | 146 | DYEELREQLSSVSSFERFEIFPKTSSWPNHDSN | 33 |
| 170 | 187 | KKGNSYPKLSKSYINDKG | 18 |
| 202 | 211 | SADQQSLYQN | 10 |
| 226 | 241 | KFKPEIAIRPKVRDQE | 16 |
| 278 | 291 | AGSGIIISDTPVHD | 14 |
| 296 | 315 | CQTPKGAINTSLPFQNIHPI | 20 |
| 329 | 344 | LRLATGLRNVPSIQSR | 16 |
| 358 | 395 | WTGMVDGWYGYHHQNEQGSGYAADLKSTQNAIDEITNK | 38 |
| 407 | 419 | FTAVGKEFNHLEK | 13 |
| 450 | 461 | RTLDYHDSNVKN | 12 |
| 493 | 525 | MESVKNGTYDYPKYSEEAKLNREEIDGIKLEST | 33 |
| NP | 5 | 24 | GTKRSYEQMETGGERQDATE | 20 |
| 48 | 54 | KLSDYDG | 7 |
| 72 | 104 | DERRNKYLEEHPSAGKDPKKTGGPIYRRVDGKW | 33 |
| 111 | 118 | YDKEEIRR | 8 |
| 124 | 131 | NNGEDATA | 8 |
| 146 | 160 | ATYQRTRALVRTGMD | 15 |
| 169 | 178 | GSTLPRRSGA | 10 |
| 204 | 217 | RNFWRGENGRRTRV | 14 |
| 229 | 235 | KFQTAAQ | 7 |
| 243 | 253 | RESRNPGNAEI | 11 |
| 289 | 297 | HDFEREGYS | 9 |
| 347 | 360 | IRGKKVIPRGKLST | 14 |
| 365 | 377 | IASNENVEIMDSN | 13 |
| 392 | 406 | SGGNTNQQKASAGQI | 15 |
| 417 | 423 | NLPFERA | 7 |
| 430 | 495 | SGNNEGRTSDMRTEVIRMMESAKPEDLSFQGRGVFELSDEKATNPIVPSFDMSNEGSYFFGDNAEE | 66 |
| NA | 38 | 55 | IQLGNQNQIETCNQSVIT | 18 |
| 74 | 94 | FAAGQSVVSVKLAGNSSLCPV | 21 |
| 139 | 154 | LLNDKHSNGTIKDRSP | 16 |
| 213 | 226 | TDTIKSWRNNILRT | 14 |
| 246 | 256 | PSNGQASYKIF | 11 |
| 260 | 272 | KGKIVKSVEMNAP | 13 |
| 323 | 341 | GDNPRPNDKTGSCGPVSSN | 19 |
| 357 | 393 | VWIGRTKSISSRNGFEMIWDPNGWTGTDNNFSIKQDI | 37 |
| 451 | 465 | DTVGWSWPDGAELPF | 15 |
| M2 | 5 | 14 | TEVETPTRSE | 10 |
| 56 | 92 | KYGLKRGPSTEGVPESMREEYQQEQQSAVDVDDGHFV | 37 |
| M1 | 30 | 48 | SVFAGKNTDLEALMEWLKT | 19 |
| 70 | 95 | SERGLQRRRFVQNALNGNGDPNNMDR | 26 |
| 105 | 120 | REITFHGAKEVSLSYS | 16 |
| 155 | 176 | ADSQHRSHRQMATTTNPLIRHE | 22 |
| 189 | 204 | MEQMAGSSEQAAEAME | 16 |
| 206 | 232 | ANQTRQMVHAMRTIGTHPSSSAGLKDDLLE | 27 |
| 238 | 248 | QAYQKRMGVQM | 11 |
| NS2 | 17 | 31 | LMRMSKMQLGSSSEDLNGMVT | 15 |
| 35 | 44 | FESLKIYRDS | 10 |
| 46 | 75 | GETVMRMGDLHYLQSRNEKWREQLGQKFEE | 30 |
| 88 | 97 | KATENSFEQI | 10 |
| NS1 | 21 | 55 | RFADNGLGDAPFLDRLRRDQKSLKGRGNTLGLDIE | 35 |
| 81 | 101 | IASVPTSRYLSDMTLEEMSRD | 21 |
| 122 | 129 | AIMEKNIV | 8 |
| 159 | 174 | EISPLPSLPGHTYEDV | 16 |
| 192 | 216 | VRVSENIQRFAWRNCDENGRPSLPP | 25 |

The core similar sequences are marked with the red color. To facilitate alignment, some short epitope sequences are filled up to at least 15 aa by adding flanking sequences and marked with the blue color.

**Extended Data Table 12 | Epitopes of SARS-CoV-2.**

| **Protein** | **Start** | **End** | **Epitope** | **Length** |
| --- | --- | --- | --- | --- |
| ORF1ab | 75 | 81 | DARTAPH | 7 |
| 96 | 102 | QYGRSGE | 7 |
| 127 | 138 | GNKGAGGHSYGA | 12 |
| 147 | 168 | DELGTDPYEDFQENWNTKHSSG | 22 |
| 190 | 198 | FCGPDGYPL | 9 |
| 243 | 252 | ERSEKSYELQ | 10 |
| 305 | 312 | PVASPNEC | 8 |
| 326 | 334 | CGETSWQTG | 9 |
| 348 | 360 | NLTKEGATTCGYL | 13 |
| 374 | 391 | HNSEVGPEHSLAEYHNES | 18 |
| 437 | 446 | GVVGEGSEGL | 10 |
| 511 | 524 | VTKGKAKKGAWNIG | 14 |
| 763 | 779 | LQPLEQPTSEAVEAPLV | 17 |
| 814 | 826 | TLKGGAPTKVTFG | 13 |
| 925 | 963 | YPPDEDEEEGDCEEEEFEPSTQYEYGTEDDYQGKPLEFG | 39 |
| 965 | 1001 | TSAALQPEEEQEEDWLDDDSQQTVGQQDGSEDNQTTT | 37 |
| 1045 | 1053 | IVEEAKKVK | 9 |
| 1069 | 1099 | GGVAGALNKATNNAMQVESDDYIATNGPLKV | 31 |
| 1120 | 1126 | PNVNKGE | 7 |
| 1204 | 1231 | AEIPKEEVKPFITESKPSVEQRKQDDKK | 28 |
| 1262 | 1269 | NLHPDSAT | 8 |
| 1303 | 1311 | TKKAGGTTE | 9 |
| 1319 | 1341 | KVPTDNYITTYPGQGLNGYTVEE | 23 |
| 1474 | 1485 | TVSVSSPDAVTA | 12 |
| 1490 | 1500 | LTSSSKTPEEH | 11 |
| 1511 | 1522 | YKDWSYSGQSTQ | 12 |
| 1533 | 1545 | KSVYYTSNPTTFH | 13 |
| 1591 | 1615 | QVVDMSMTYGQQFGPTYLDGADVTKIKPHNSHEG | 25 |
| 1635 | 1642 | YHTTDPSF | 8 |
| 1655 | 1662 | KWKYPQVN | 8 |
| 1691 | 1697 | NPPALQD | 7 |
| 1700 | 1706 | YRARAGE | 7 |
| 1756 | 1762 | VVCKTCGQQQTTLKGVEAV | 7 |
| 1809 | 1816 | APPAQYEL | 8 |
| 1826 | 1832 | EYTGNYQ | 7 |
| 1856 | 1863 | SSEYKGPI | 8 |
| 1871 | 1878 | NSYTTTIK | 8 |
| 1893 | 1909 | DPKLDNYYKKDNSYFTE | 17 |
| 1912 | 1925 | IDLVPNQPYPNASF | 14 |
| 1944 | 1953 | LTGYKKPASR | 10 |
| 1974 | 1980 | HYTPSFK | 7 |
| 1997 | 2005 | ATNKATYKP | 9 |
| 2017 | 2023 | KPVETSN | 7 |
| 2030 | 2036 | SEDAQGM | 7 |
| 2044 | 2058 | LKPVSEEVVENPTIQ | 15 |
| 2187 | 2193 | NSRIKAS | 7 |
| 2195 | 2201 | PTTIAKN | 7 |
| 2297 | 2304 | SLDTYPSL | 8 |
| 2480 | 2489 | PINPTDQSSY | 10 |
| 2508 | 2514 | AGQKTYE | 7 |
| 2529 | 2535 | ANNTKGS | 7 |
| 2546 | 2557 | KSKCEESSAKSA | 12 |
| 2579 | 2585 | DVGDSAE | 7 |
| 2640 | 2649 | GFVDSDVETK | 10 |
| 2662 | 2670 | DIEVTGDSC | 9 |
| 2680 | 2687 | VENMTPRD | 8 |
| 2812 | 2822 | IDGGVTRDIAS | 11 |
| 2839 | 2849 | SQRGGSYTNDK | 11 |
| 2924 | 2933 | DASGKPVPYC | 10 |
| 3220 | 3227 | AMDTTSYR | 8 |
| 3240 | 3257 | DFSNSGSDVLYQPPQTSI | 18 |
| 3355 | 3364 | DTANPKTPKY | 10 |
| 3382 | 3388 | NGSPSGV | 7 |
| 3433 | 3443 | GVHAGTDLEGN | 11 |
| 3449 | 3462 | VDRQTAQAAGTDTT | 14 |
| 3700 | 3706 | VYDDGAR | 7 |
| 3827 | 3835 | GLLPPKNSI | 9 |
| 3957 | 3973 | FATAQEAYEQAVANGDS | 17 |
| 4014 | 4025 | KQARSEDKRAKV | 12 |
| 4077 | 4089 | YNTYKNTCDGTTF | 13 |
| 4115 | 4122 | SMDNSPNL | 8 |
| 4155 | 4167 | AAGTTQTACTDDN | 13 |
| 4196 | 4211 | FPKSDGTGTIYTELEP | 16 |
| 4214 | 4224 | RFVTDTPKGPK | 11 |
| 4255 | 4263 | GNATEVPAN | 9 |
| 4284 | 4292 | LASGGQPIT | 9 |
| 4302 | 4322 | TGTGQAITVTPEANMDQESFG | 21 |
| 4335 | 4342 | DHPNPKGF | 8 |
| 4354 | 4362 | TTCANDPVG | 9 |
| 4411 | 4421 | LTPCGTGTSTD | 11 |
| 4449 | 4457 | QEKDEDDNL | 9 |
| 4615 | 4626 | IQTTPGSGVPVV | 12 |
| 4647 | 4655 | SHVDTDLTK | 9 |
| 4713 | 4719 | FPPTSFG | 7 |
| 4802 | 4809 | VKPGNFNK | 8 |
| 5011 | 5017 | YPKCDRA | 7 |
| 5066 | 5081 | YVKPGGTSSGDATTAY | 16 |
| 5194 | 5204 | ETDLTKGPHEF | 11 |
| 5216 | 5229 | DDYVYLPYPDPSRI | 14 |
| 5260 | 5269 | PLTKHPNQEY | 10 |
| 5302 | 5310 | DNTSRYWEP | 9 |
| 5374 | 5382 | CNAPGCDVT | 9 |
| 5397 | 5403 | KSHKPPI | 7 |
| 5421 | 5428 | CVGSDNVT | 8 |
| 5493 | 5501 | VGKPRPPLN | 9 |
| 5523 | 5532 | TFEKGDYGDA | 10 |
| 5602 | 5613 | STLQGPPGTGKS | 12 |
| 5724 | 5732 | GDPAQLPAP | 9 |
| 5786 | 5792 | KAHKDKS | 7 |
| 5854 | 5865 | TQTVDSSQGSEY | 12 |
| 5944 | 5953 | HPTQAPTHLS | 10 |
| 6019 | 6027 | CHATREAVG | 9 |
| 6047 | 6071 | TGYVDTPNNTDFSRVSAKPPPGDQF | 25 |
| 6278 | 6286 | AQPCSDKAY | 9 |
| 6297 | 6303 | THSDKFT | 7 |
| 6336 | 6343 | LPGCDGGS | 8 |
| 6374 | 6383 | DSPCESHGKQ | 10 |
| 6466 | 6474 | VVNKGHFDGQQGEVPVSIINN | 9 |
| 6541 | 6547 | KRDAPAH | 7 |
| 6559 | 6566 | IAKKPTET | 8 |
| 6600 | 6614 | VKGLQPSVGPKQASL | 15 |
| 6652 | 6660 | LQEFKPRSQ | 9 |
| 6796 | 6808 | KLQSSQAWQPGVA | 13 |
| 6826 | 6834 | QNYGDSATL | 9 |
| 6870 | 6880 | AGSDKGVAPGT | 11 |
| 6900 | 6908 | DFVSDADST | 9 |
| 6930 | 6945 | YDPKTKNVTKENDSKE | 16 |
| 7011 | 7017 | GKPREQI | 7 |
| S protein | 13 | 37 | SQCVNLTTRTQLPPAYTNSFTRGVY | 25 |
| 59 | 81 | FSNVTWFHAIHVSGTNGTKRFDN | 23 |
| 138 | 154 | DPFLGVYYHKNNKSWME | 17 |
| 177 | 189 | MDLEGKQGNFKNL | 13 |
| 206 | 221 | KHTPINLVRDLPQGFS | 16 |
| 250 | 260 | TPGDSSSGWTA | 11 |
| 304 | 322 | KSFTVEKGIYQTSNFRVQP | 19 |
| 329 | 363 | FPNITNLCPFGEVFNATRFASVYAWNRKRISNCVA | 35 |
| 369 | 393 | YNSASFSTFKCYGVSPTKLNDLCFT | 25 |
| 404 | 426 | GDEVRQIAPGQTGKIADYNYKLP | 23 |
| 440 | 501 | NLDSKVGGNYNYLYRLFRKSNLKPFERDISTEIYQAGSTPCNGVEGFNCYFPLQSYGFQPTN | 62 |
| 516 | 536 | ELLHAPATVCGPKKSTNLVKN | 21 |
| 555 | 562 | SNKKFLPF | 8 |
| 616 | 632 | NCTEVPVAIHADQLTPT | 17 |
| 634 | 644 | RVYSTGSNVFQ | 11 |
| 656 | 666 | VNNSYECDIPI | 11 |
| 672 | 690 | ASYQTQTNSPRRARSVASQ | 19 |
| 695 | 710 | YTMSLGAENSVAYSNN | 16 |
| 773 | 779 | EQDKNTQ | 7 |
| 786 | 800 | KQIYKTPPIKDFGGF | 15 |
| 807 | 814 | PDPSKPSK | 8 |
| 828 | 842 | LADAGFIKQYGDCLG | 15 |
| 1035 | 1043 | GQSKRVDFC | 9 |
| 1107 | 1118 | RNFYEPQIITTD | 12 |
| 1133 | 1172 | VNNTVYDPLQPELDSFKEELDKYFKNHTSPDVDLGDISGI | 40 |
| 1252 | 1267 | SCCKFDEDDSEPVLKG | 16 |
| ORF3a | 17 | 28 | QGEIKDATPSDF | 12 |
| 61 | 71 | KIITLKKRWQL | 11 |
| 172 | 197 | GDGTTSPISEHDYQIGGYTEKWESGV | 26 |
| 216 | 225 | STQLSTDTGV | 10 |
| 238 | 272 | DEPEEHVQIHTIDGSSGVVNPVMEPIYDEPTTTTS | 35 |
| ORF4 (E) | 57 | 71 | YVYSRVKNLNSSRVP | 15 |
| ORF5 (M) | 5 | 20 | NGTITVEELKKLLEQW | 16 |
| 180 | 191 | KLGASQRVAGDS | 12 |
| 199 | 218 | YRIGNYKLNTDHSSSSDNIA | 20 |
| ORF6 | 44 | 57 | LTENKYSQLDEEQP | 14 |
| ORF7a | 17 | 25 | LYHYQECVR | 9 |
| 33 | 51 | EPCSSGTYEGNSPFHPLAD | 19 |
| 71 | 96 | VKHVYQLRARSVSPKLFIRQEEVQEL | 26 |
| ORF7b | 33 | 39 | ELQDHNE | 7 |
| ORF8 | 23 | 45 | QSCTQHQPYVVDDPCPIHFYSKW | 23 |
| 48 | 56 | RVGARKSAP | 9 |
| 63 | 78 | DEAGSKSPIQYIDIGN | 16 |
| ORF9 (N) | 4 | 15 | NGPQNQRNAPRI | 12 |
| 17 | 48 | FGGPSDSTGSNQNGERSGARSKQRRPQGLPNN | 32 |
| 59 | 105 | HGKEDLKFPRGQGVPINTNSSPDDQIGYYRRATRRIRGGDGKMKDLS | 47 |
| 119 | 127 | AGLPYGANK | 9 |
| 137 | 163 | GALNTPKDHIGTRNPANNAAIVLQLPQ | 27 |
| 165 | 216 | TTLPKGFYAEGSRGGSQASSRSSSRSRNSSRNSTPGSSRGTSPARMAGNGGD | 52 |
| 226 | 267 | RLNQLESKMSGKGQQQQGQTVTKKSAAEASKKPRQKRTATKA | 42 |
| 276 | 299 | RRGPEQTQGNFGDQELIRQGTDYK | 24 |
| 358 | 402 | DAYKTFPPTEPKKDKKKKADETQALPQRQKKQQTVTLLPAADLDD | 45 |
| 404 | 416 | SKQLQQSMSSADS | 13 |

The core similar sequences are marked with the red color. To facilitate alignment, some short epitope sequences are filled up to at least 15 aa by adding flanking sequences and marked with the blue color.
